# The genomics of local Adaptation in trees: Are we out of the woods yet?

Brandon M. Lind<sup>\*1</sup>, Mitra Menon<sup>\*</sup>, Connie E. Bolte<sup>\*†</sup>,  
Trevor M. Faske<sup>†</sup>, and Andrew J. Eckert<sup>†</sup>

<sup>\*</sup>Integrative Life Sciences, Virginia Commonwealth University, Richmond, Virginia 23284 USA

<sup>†</sup>Department of Biology, Virginia Commonwealth University, Richmond, Virginia 23284 USA

October 14, 2017

**Running Title:** Are we out of the woods yet?

**Keywords:**

trees, GWAS, genetic architecture, polygenic local adaptation

---

<sup>1</sup> lindb@vcu.edu

# Abstract

There is substantial interest in uncovering the genetic bases of the traits underlying adaptive responses in tree species, as this information is central to understanding how evolution proceeds in such systems and will aid conservation and industrial endeavors. Here, we synthesize evidence for local adaptation in trees by summarizing 129 common garden experiments across 20 genera of tree species that describe levels of heritability, differentiation of quantitative genetic variation ( $Q_{ST}$ ), and/or  $Q_{ST}$ - $F_{ST}$  comparisons. Given the abundant evidence for local adaptation, we discuss theoretical expectations for adaptive genetic architectures and contextualize progress in trees by synthesizing 52 genotype-phenotype association studies across ten genera. Our survey suggests that most tree traits generally exhibit considerably high heritability ( $\overline{h^2} = 0.367$ ,  $\overline{H^2} = 0.430$ ), that underlying genetic variation is often structured across populations ( $\overline{Q_{ST}} = 0.243$ ) and is significantly greater than  $F_{ST}$  in 69% of comparisons across the literature. Despite widespread evidence for local adaptation acting on abundant, heritable genetic variation, we find that single-locus associations explain only a small proportion of the phenotypic variation, often with small estimated per-locus effects ( $\overline{r^2} = 0.039$ ). Together, these results suggest differential selection across populations often acts on tree phenotypes underlain by polygenic architectures consisting of numerous small to moderate effect loci. We close by addressing hurdles and promising alternatives to fully describing the underlying genetic architecture of quantitative traits in trees, remark upon the current state of tree genomics, and identify future directions for this field.

## 31 Table of Contents

|    |                                                                                      |           |
|----|--------------------------------------------------------------------------------------|-----------|
| 32 | <b>The genomics of local Adaptation in trees: Are we out of the woods yet? .....</b> | <b>i</b>  |
| 33 | <b>Abstract .....</b>                                                                | <b>ii</b> |
| 34 | <b>Introduction .....</b>                                                            | <b>1</b>  |
| 35 | <b>Identifying genetically based phenotypic and heritable variation .....</b>        | <b>4</b>  |
| 36 | <b>Expectations for the loci underlying quantitative traits .....</b>                | <b>11</b> |
| 37 | Gene action .....                                                                    | 13        |
| 38 | Negative selection .....                                                             | 18        |
| 39 | Positive selection .....                                                             | 20        |
| 40 | Gene flow .....                                                                      | 23        |
| 41 | Summary.....                                                                         | 25        |
| 42 | <b>The genomics of local adaptation in trees .....</b>                               | <b>26</b> |
| 43 | Common approaches used to identify adaptive loci .....                               | 26        |
| 44 | Current progress in trees.....                                                       | 27        |
| 45 | Are we out of the woods yet? .....                                                   | 29        |
| 46 | <b>The Path Forward.....</b>                                                         | <b>31</b> |
| 47 | Stepping off the path – what’s in our pack? .....                                    | 31        |
| 48 | At the trail junction – where to next? .....                                         | 36        |
| 49 | <b>Concluding Remarks.....</b>                                                       | <b>43</b> |
| 50 | <b>Acknowledgements.....</b>                                                         | <b>44</b> |
| 51 | <b>References .....</b>                                                              | <b>45</b> |
| 52 | <b>Author Contributions .....</b>                                                    | <b>71</b> |
| 53 | <b>FIGURES .....</b>                                                                 | <b>72</b> |
| 54 | Figure 1.....                                                                        | 72        |
| 55 | Figure 2 .....                                                                       | 73        |
| 56 | Figure 3A.....                                                                       | 74        |
| 57 | Figure 3B.....                                                                       | 75        |
| 58 | <b>BOXES .....</b>                                                                   | <b>76</b> |
| 59 | Box 1 figure.....                                                                    | 76        |
| 60 | Box 1: Basic Concepts from Quantitative Genetics .....                               | 77        |
| 61 | <b>Supplemental Information .....</b>                                                | <b>80</b> |
| 62 | Supplemental Figures .....                                                           | 81        |
| 63 | Supplemental Tables .....                                                            | 85        |
| 64 | BOXES .....                                                                          | 88        |
| 65 | <b>Supplemental References.....</b>                                                  | <b>89</b> |
| 66 |                                                                                      |           |

## Introduction

Trees are plants with an arborescent habit, which is loosely defined as a tall-statured growth form usually producing wood (reviewed by Petit & Hampe 2006). Approximately 15% to 25% of the land plant taxa are classified as being trees (Oldfield *et al.* 1998; Grandtner 2005; Scotland & Wortley 2004), with forested ecosystems accounting for approximately 30% of terrestrial vegetation (Costanza *et al.* 1997) and providing habitat for terrestrial biodiversity. Indeed, trees play important ecological roles in diverse communities across the globe, such as vertical structural habitat for various taxa, seeds for wildlife forage, forest cover to understory species, the production of oxygen, carbon sequestration, air and water filtration, as well as the reduction of erosion, protracting snowmelt, and desertification. Of these, biological roles are ultimately defined by a set of life history characteristics common to most tree species (Petit & Hampe 2006), despite the polyphyly of the arborescent habit across the phylogeny of land plants. These include predominantly outcrossing mating systems with high levels of gene flow and fecundities, as well as long lifespans and generation times (Loehle 1987; Mitton & Williams 2006; Savolainen *et al.* 2007). As a result, tree species typically have large effective population sizes, moderate to high levels of genetic diversity, and frequent occurrences of locally adapted ecotypes (see refs in Savolainen *et al.* 2007; Alberto *et al.* 2013; Sork *et al.* 2013; Boshier *et al.* 2015; Prunier *et al.* 2015; Holliday *et al.* 2017). Across species, however, rates of morphological (Stacy *et al.* 2017) and molecular (Smith 2008, Leitch & Leitch 2012; Buschiazzi *et al.* 2012; Pavy *et al.* 2012; Luo *et al.* 2015) evolution tend to be slow. Additionally, genome size varies enormously across species of trees, ranging from 0.4Gbp to 31Gbp (reviewed in Neale *et al.* 2017). Recent sequencing efforts in gymnosperms, which dominate the large genome size end of this spectrum, reveal that much of tree genome size variation is due to transposable element dynamics and gene family evolution (Leitch & Leitch 2012; Morse *et al.* 2009; Nystedt *et al.* 2013; Prunier *et al.* 2015; Neale *et al.* 2017) where duplication events of select gene families

may contribute to the ability of trees to colonize marginalized habitats (Leitch & Leitch 2012; Prunier et al. 2015; Neale et al. 2017).

In trees, the general presence of large geographical ranges and extensive gene flow across these ranges also provides an ideal setting to disentangle neutral from selective evolutionary processes (Neale & Kremer 2011). Indeed, their longevity and wide and heterogeneous geographical distributions lend trees suitable for addressing several key evolutionary questions about the importance of historical climatic fluctuations, and local adaptation involving shifts in allele frequencies (Lotterhos & Whitlock 2014; Savolainen et al. 2007, 2013; Platt et al. 2015). As we detail in subsequent sections, evidence consistent with local adaptation in trees is ubiquitous, even across fine spatial scales where it had been hypothesized that gene flow may overcome selection of locally favored alleles (e.g., Mitton et al. 1989, 1998; Budde et al. 2014; Csilléry et al. 2014; Vizcaíno-Palomar et al. 2014; Eckert et al. 2015; Holliday et al. 2016; Roschanksi et al. 2016; Lind et al. 2017).

Quantitative phenotypes are often used as a proxy for total lifetime fitness, which is composed of two broad components: survival and reproduction. Since most quantitative traits are related to some component of the total lifetime fitness, they are often used to assess potential for local adaptation. For many plant taxa, selection pressures are expected to be strongest for variation in survival during the juvenile stages of development (Donohue et al. 2010), particularly for those taxa with high reproductive output, as is the case for many tree species. As such, juvenile stages in plants have been found to contribute substantially to total lifetime fitness (Postma & Agren 2016). Phenotypic traits associated with juvenile survival have thus received the majority of genetic research focus across tree species, particularly due to the long-lived nature of tree species. Such studies have led to intriguing insights gained through a long history of common garden experimentation (Langlet 1971; Morgenstern 1996). For example, traits such as growth (e.g. height and diameter), form (e.g. specific gravity, straightness), phenology (e.g. bud flush, bud set), juvenile performance (e.g. germination rate,

seed traits) and physiology (e.g. cold hardiness, water-use efficiency) have all been shown to be under moderate to high genetic control (reviewed in Cornelius 1994, Howe *et al.* 2003, Alberto *et al.* 2013; this review). Variation for these traits is also often partitioned among populations (McKay & Latta 2002, Howe 2003, Alberto *et al.* 2013, Savolainen *et al.* 2007; Boshier *et al.* 2015; this review), despite the vast majority of neutral variation remaining within populations (Howe *et al.* 2003; Neale & Savolainen 2004). With few exceptions (e.g., major gene resistance in the white pine-blister rust pathosystem; Kinloch *et al.* 1970; Liu *et al.* 2017), variation for these traits forms a continuum across individuals, thus implying that the underlying genetic architecture of these traits is composed of a large number of small to moderate effect loci (i.e., a polygenic architecture; concept reviewed in Savolainen *et al.* 2007, 2013; Gagnaire & Gaggiotti 2016; Hoban *et al.* 2016). There is some uncertainty, however, concerning the properties of the effect size distributions comprising polygenic architectures (*sensu* Fisher 1930, Kimura 1983, and Orr 1998), the relative importance of various forms of gene actions (e.g., dominance, epistasis) in producing trait variation (Crow 2010, Hansen 2013), how these interact to affect the evolution of polygenic architectures in natural populations (Hansen 2006), and how these factors will ultimately influence evolutionary processes and outcomes in forest trees (Savolainen *et al.* 2007; Sork *et al.* 2013; Prunier *et al.* 2015). Considerable strides, made in the past through genotype-phenotype-environment studies (*sensu* Sork *et al.* 2013), have contributed to intriguing insight into the genomic basis of local adaptation for tree species. However, given the large genome size of many tree species, such methods have been criticized as lacking in power and sufficient coverage needed to detect small effect loci, which is further exacerbated by rapid decay of linkage disequilibrium (LD) in most forest trees (Mackay 2009; Savolainen *et al.* 2007). Despite these limitations, association studies have been moderately successful in linking genotypes and phenotypes, including providing information for making inferences about local adaptation.

In this review, we highlight the extensive evidence for local adaptation in undomesticated

trees by reviewing transplant designs often used in investigations of quantitative genetic differentiation. Using an extensive literature survey across both gymnosperm and angiosperm species, we provide an overview of these transplant methods, give examples of each, and quantify the distribution of narrow sense heritability and  $Q_{ST}$  estimates across various trait categories. We further use this survey to establish patterns of comparative quantitative and neutral genetic differentiation (i.e.,  $Q_{ST}-F_{ST}$  tests). Before we transition into discussing common methods used to uncover loci underlying adaptation, we establish expectations for the genetic architecture of polygenic, fitness-related traits by reviewing the theory available to date. We then provide an extensive review of genotype-phenotype associations in trees and provide the distribution of the percent phenotypic variance explained by empirically associated loci. Using this distribution, we remark on the progress towards uncovering the loci underlying local adaptation in tree species. Given this synthesis, we highlight exemplary genomic resources available in trees to fill knowledge gaps, identify promising avenues of future research, identify key benchmarks and necessary steps towards truly integrating studies of trees into the genomic era, and address our primary question, “Are we out of the woods yet?”.

## Identifying genetically based phenotypic and heritable variation

Trees have evolved numerous adaptations as a result of their vast ecological breadth. As such, it has long been the goal of forest scientists, engaged with industrial and academic pursuits alike, to understand the traits important to viability and persistence within and across tree species. Among the most frequent designs used by forest scientists, common gardens and reciprocal transplants have aimed at describing genetically based differentiation of measured phenotypes among various source populations of varying sizes and across various geographic scales. Across these designs, investigators seek to better understand the phenotypes relevant to local adaptation and the selective pressures influencing these phenotypes. The exact design chosen, however, is generally based on the questions driving the research endeavor and often

by the availability of resources (Morgenstern 1996; Blanquart et al. 2013; de Villemereuil et al. 2015). In this section, we briefly review these designs, identify relevant questions and inferences, highlight some of the important practical applications of these techniques, and discuss examples of past investigations in various tree species.

There is a rich history of forest scientists using the common garden approach dating back hundreds of years (Langlet 1971; Mátyás 1996; Savolainen et al. 2007). In a broad sense, a common garden design is used to test for differentiation among genetically distinct groups in a homogeneous environment. These groups can be clonal replicates or sibships (families) derived from species or hybrids sampled from various populations, provenances, varieties, cultivars, or agricultural accessions (Cheplick 2015). When individuals from various origins are grown together under the same conditions, the observed phenotypic differentiation is expected to reflect underlying genetic variation, especially when maternal effects are assumed or shown to be absent. Common garden and provenance trial designs can also establish evidence that the phenotypes under study are heritable, a prerequisite for an adaptive response to selective agents (Box 1), and that populations exhibit quantitative genetic differentiation (i.e.,  $Q_{ST}$ ; Spitz 1993). When driven by questions related to differentiation alone, a single common garden approach can be used to describe levels of quantitative genetic variation within and among genetically distinct groups. In these cases, no environmental variables are manipulated, and thus, unequivocal evidence for trait divergence among groups, and the contributing factors influencing this divergence (e.g., neutral or selective processes), is often limited because conclusions must be based on *post hoc* inferences about source environments for the materials established in the common garden. Even so, single common garden approaches can be a powerful tool to demonstrate evidence congruent with local adaptation. For instance, the white carob tree (*Prosopis alba* Griseb., Leguminosae) growing in Argentina is an ideal multipurpose tree that has potential for use in reforestation and afforestation applications in the region. However, this genus is known to invade other regions, encroach on farmland and waterways,



and has a thorny growth habit that can injure and cause sepsis in livestock. To better understand how forestry applications can balance the benefits of production and forest protection, Bessega et al. (2015) used a single common garden representing eight provenances of *P. alba* to compare estimates of neutral genetic patterns to the quantitative genetic variation of life history traits related to economic importance, leaf morphological traits posited to be influential to heat-tolerance and physiological response, and spine length, a trait of silvicultural significance. They found that for most traits the underlying genetic variation was differentiated across populations ( $Q_{ST} \approx 0.000-0.362$ , average over all traits = 0.139). Additionally, for most traits, source environments were correlated with measured trait variation in the common garden, suggesting that the observed differentiation was driven by temperature, precipitation, wind speed, and sunshine fraction, with signals of divergent selection corroborated across  $Q_{ST}-F_{ST}$  comparisons and tests for selection (e.g., *S* test, *sensu* Ovaskainen et al., 2011). Bessega et al. (2015) concluded that the signal of non-neutral differentiation was indicative of divergent phenotypic optima across populations, and that this variation could be used to direct future breeding programs across the region.

When there is evidence that environmental differences among source populations may be driving adaptive divergence, strong environmental candidates can be manipulated (artificially or via site selection) in a multiple common garden design to further investigate hypotheses of differentiation and adaptation. For instance, the sweet chestnut (*Castanea sativa* Mill., Fagaceae), also known for its edible fruit, is distributed across much of Minor Asia and southern Europe and is an ecologically important component of many Mediterranean systems. *Castanea sativa* exhibits ecological, physiological, morphological, and genetic variability as the range overlays a climatic transition from xeric Mediterranean conditions to wetter Euro-Siberian environments (see refs in Lauteri et al., 2004). Previous common garden experiments carried out by Lauteri and colleagues have indicated that populations across this transition are further

differentiated by water use efficiency (the ratio of plant carbon gain to water loss) and carbon isotope discrimination,  $\Delta$ . To further explore variability of drought-related traits, Lauteri et al. (2004) used an *ex situ* multiple common garden design using two water and temperature treatments in individual climatic chambers to assess differentiation among six populations across Spain, Italy, and Greece. They found *treatment* and *population x treatment* effects were significant, suggesting variation in drought adaptation across populations. Additionally, populations originating from dry sites generally exhibited higher values of  $\Delta$ , which was also composed of significant additive genetic variation ( $h^2 = 0.15-0.52$ ), and suggests that genetic and physiological mechanisms of drought adaptation confer a capacity to colonize a wide arrange of environmental conditions, while strong negative relationships between  $\Delta$  and growth-related traits is suggestive of strong evolutionary constraints at juvenile stages.

While *ex situ* common gardens approaches (e.g., Lauteri et al. 2004) can provide strong evidence of adaptive divergence among source populations, and in some cases corroborate putative drivers of observed differentiation, these studies can often exclude key environmental factors, possibly leading to confounding signals of adaptation (Kawecki & Ebert 2004). When *in situ* experimentation is feasible, site selection can be used to test for environmental drivers of local adaptation. For example, Evans et al. (2016) investigated traits related to growth and phenology in juvenile narrowleaf cottonwood (*Populus angustifolia* James, Salicaceae) by planting families from nine populations across the native range into three common gardens, one at both the northern and southern range extents and one within the central interior of the range. Phenotypic traits exhibited strong genetic control ( $H^2$  bud flush initiation: 0.11-0.53, bud flush duration: 0.06-0.37, bud set: 0.04-0.73, height: 0.03-0.43, and diameter: 0.20-0.32) and were differentiated across populations ( $Q_{ST}$  bud flush initiation: 0.21-0.64, bud flush duration: 0.26-0.57, bud set: 0.70-0.89, height: 0.48-0.90, and diameter: 0.44-0.63). Using  $Q_{ST}-F_{ST}$  comparisons and clinal analyses alongside the quantitative genetic analyses, Evans et al.

(2016) concluded that climate cues played a major role in structuring adaptive variation across the range of *P. angustifolia*, and that future industrial and conservation applications should utilize this information to inform source environments for optimal outcomes.

As both *in situ* and *ex situ* common garden trials can include multiple environmental influences in their design, reciprocally transplanting to all source environments is not necessarily a requirement to decompose genetic variation underlying adaptive traits or to provide evidence for, or the drivers of, differentiation among populations. Thus, these designs may preclude inferences regarding local adaptation *sensu stricto*. To produce such evidence, source populations can be planted in a (full- or incomplete-factorial) reciprocal transplant design and allow for traits related to fitness to be assessed across native ('home') and non-native ('away') environments. If a population is locally adapted, individuals exposed to their native environments should show increased growth, survival, and reproduction relative to non-native genotypes (Kawecki & Ebert 2004; Leimu & Fischer 2008; Hereford 2009; Savolainen et al. 2013). For example, with the goal of delineating conservation units based on molecular and quantitative trait differentiation, Rodríguez-Quilón et al. (2016) used four reciprocally-transplanted common gardens to assess height and survival of samples from 35 natural populations of maritime pine (*Pinus pinaster* Aiton, Pinaceae). For both traits,  $Q_{ST}$  was consistently larger than  $F_{ST}$  across the four sites, a pattern suggestive of divergent selection. Six distinct gene pools based on evolutionary history of neutral markers were identified, and because high quantitative differentiation ( $Q_{ST}$ ) was found within these pools, hierarchical analyses were used to further identify ten adaptive population groups for use in conservation and breeding approaches.

Available evidence suggests that many populations of tree species have substantial heritable genetic variation, and that the quantitative traits under study often show signals of divergent selection across both broad and fine spatial scales. But how broadly can we apply this statement? Are there overall patterns of heritability and quantitative genetic structure across

tree species? Because estimates of heritability and  $Q_{ST}$  are often only applicable to a specific set of populations, for a specific set of environments, at any specific point in time, a large sample of these estimates is therefore necessary to synthesize the current literature with regard to patterns across taxa. To accomplish this aim, we synthesized estimates from 129 published studies with estimates of narrow sense heritability ( $n = 114$ ) and/or estimates of quantitative genetic differentiation ( $Q_{ST}$ ;  $n = 37$ ). However, we excluded papers that have been cited for estimates of  $Q_{ST}$  or heritability that were calculated *post hoc* from variance components (i.e., we only recorded estimates that were explicitly reported in the original publication). We also exclude from our presentation any estimates of heritability that were greater than 1.0. While some of the articles report individual-tree heritabilities, we focus on estimates of family heritability. For comparison, we further grouped measured traits into 14 broad categories: cold hardiness, disease resistance, drought hardiness, form, growth, herbivore and insect resistance, leaf and needle properties, phenology, plant secondary metabolites, reproduction, resource allocation, seed and early germination properties, survival, and wood properties. Because sample size can influence the estimation of both heritability and  $Q_{ST}$ , for each trait category we used a weighted average where weights were equal to the number of families used to estimate variance components and thus  $h^2$  and  $Q_{ST}$ .

In 1994, Cornelius presented a summary of narrow sense heritability estimates across various form, growth, and wood property traits for *Pinus*, *Eucalyptus*, as well as other conifers and broadleaf tree species. For many of the distributions underlying their survey, heritability estimates were generally within the range of 0.10-0.30. In comparison, our survey of 1878 estimates revealed relatively elevated estimates for these trait groupings (Supplemental Table S1; Supplemental File F1). In general, the average  $h^2$  was within the range of 0.20-0.50, with seed and seedling properties (covering various germination, seed weight, and cotyledon properties) near 0.73 (Figure 1) with tendencies towards values below 0.5 for most traits (Figure S1). Except for disease resistance, herbivore and insect resistance, leaf and needle properties,

and plant secondary metabolites, there were more estimates from gymnosperms than from angiosperms, which were generally contributed from species of *Pinus* than from either *Populus* or *Eucalyptus* (Supplemental Table S1). Grouping heritability estimates across all trait categories and species, there was no indication of a decrease in heritability across age groups (Figure S2). There was also a general lack of a trend when heritabilities were compared within trait groups, except for cold hardiness, and perhaps either form or leaf and needle properties (Figure S3). While the (lack of) trends are likely better suited for analysis within individual traits for a given population within a species, as opposed to our groupings here, these patterns provide insight into interspecific patterns. Additionally, our survey of heritability estimates reveal substantial additive genetic variation across traits that have both ecological and economic importance suggesting abundant sources upon which selection can act in future natural and breeding endeavors.

In general, most of  $Q_{ST}$  estimates from our survey was from gymnosperm species, except for form, herbivore and insect resistance, leaf and needle properties, phenology, plant secondary metabolites, and wood properties, where estimates from angiosperms were greatest (Supplemental Table S2; Supplemental File F1). The mean weighted  $Q_{ST}$  across traits groups from our survey was generally between 0.10-0.28, except for drought hardiness (0.06) and disease resistance (0.04), with median values from the unweighted distribution generally falling below the weighted average for each trait group (Figure 2). This suggests that over various geographic distances, population histories, and species, there is a general pattern of substantial genetic variation among populations underlying measured traits. Given our synthesis of  $Q_{ST}$  estimates in trees, we were curious of the evidence for adaptive divergence among populations ( $Q_{ST} > F_{ST}$ ). Of the 37 papers reporting  $Q_{ST}$  estimates in our review, 23 compared  $Q_{ST}$  with  $F_{ST}$  or  $G_{ST}$  estimated from the same populations under study (however, we excluded studies that used  $F_{ST}$  measurements taken from the literature, e.g., Bower & Aitken 2008). Of these, 18 studies compared  $Q_{ST}$  and  $F_{ST}$  in a statistical framework while the remaining five studies

compared  $Q_{ST}$  and  $F_{ST}$  numerically. Across numerical and statistical comparisons combined, 67% (254 of 381 traits) exhibited higher  $Q_{ST}$  than  $F_{ST}$ , with 69% (170 of 246 traits) exhibiting significantly higher  $Q_{ST}$  than  $F_{ST}$ . Although we did not tally instances where  $Q_{ST}$  was reported to be less than  $F_{ST}$  (statistically or otherwise), there were some instances in which this was the case. For instance, Lamy et al. (2011) found such patterns when quantifying population genetic differentiation of cavitation resistance across the species range of maritime pine (*Pinus pinaster* Aiton, Pinaceae), while Mahalovich et al. (2011) also found that  $Q_{ST} < F_{ST}$  for traits related to white pine-blister rust resistance in inoculated seedlings of whitebark pine (*Pinus albicaulis* Engelm., Pinaceae). While various explanations for such patterns were outlined by Lamy et al. (2011), canalization was argued as the most likely process driving the observed patterns, while Mahalovich et al. (2011) offered similar arguments for selection favoring the same genotype in different environments.

Despite neutral genetic differentiation partitioned primarily within populations, adaptive genetic variation seems to be structured to a greater degree across populations, more often than not, for the various fitness-related traits reviewed here. Such a pattern is indeed consistent with local adaptation, assuming that (among other considerations such as the recency of selection) mutation rates are considerably lower than migration rates in these populations (Whitlock 1999; Hendry 2002; Leinonen et al 2013). In any case, given an extensive literature supporting the local adaptation hypothesis in trees, our results appear consistent with these patterns of selective forces acting on abundant, heritable genetic variation across populations, even in the face of gene flow (discussed further in the next section).

## **Expectations for the loci underlying quantitative traits**

The homogenous environments of the common garden and reciprocal transplant designs are ideally suited to test hypotheses of local adaptation in trees (Sork et al. 2013). However, uncovering the genetic basis and contributory influence of specific loci underlying

these adaptive traits is a sizable endeavor on its own, and the success of such pursuits will be determined, in part, by the genetic architecture (i.e., the number, effect size, type, and interaction of loci) that underlies the trait in question, which is generally not known *a priori* (Stinchcombe & Hoekstra 2008; Rellstab et al. 2013; Savolainen et al. 2013; Hoban et al. 2016; Burghardt et al. 2017; Wadgymar et al. 2017). Much of our early understanding of the architectures of complex traits came shortly after Nilsson-Ehle (1909) and East (1910) independently demonstrated evidence for multiple-factor inheritance, where Fisher (1918) laid the groundwork for quantitative genetics by incorporating the additive properties of variance to partition phenotypic variation into components tractable to a model of Mendelian inheritance. It was this work, and that of Fisher's geometric model (1930), which founded the basis for attributing continuous variation of phenotypes to a polygenic model of many underlying heritable components of mainly small effect. From this model, Fisher (1930) concluded that mutations of small effect were the main drivers of adaptation, suggesting large-effect substitutions to contribute little to adaptation due to negative pleiotropic effects constraining effect size. Therefore, the fate of a given locus would be conditioned on its average, marginal effect on fitness calculated across the species, with non-additive deviations from this linear model of inconsequential influence. This micro-mutationist view, to a large extent, remained the dominant thought for nearly half a century (Orr 2005). It was then that Kimura (1983) established that for an allele to contribute to adaptation, it would need to survive the stochastic nature of drift. Thus, new mutations of low frequency and effect were less likely to contribute substantially to adaptive evolution, and considering the adaptive contribution probability of large and small effect loci, Kimura concluded that mutations of moderate effect would be the most plausible. Years later, Orr (1998) showed that over the entire bout of selection via an adaptive walk, the distribution of fixed substitutions resembles an exponential distribution, with effect size decreasing with the proximity to the phenotypic optimum (i.e., decreasing in an approximate geometric sequence). In addition, the distribution of fitness effects of beneficial mutations is also expected to be



exponential (Orr 2003; for more discussion on this aspect, see also Orr 2006; Eyre-Walker & Keightley 2007; Martin & Lenormand 2008, Kopp & Hermisson 2009b; Keightley & Eyre-Walker 2010, Dittmar *et al.* 2016, and references therein). Despite major advances in theory and technology, there still remains substantial uncertainty regarding the exact number of loci underlying many adaptive traits, the effect size distribution of these loci, and how the number of underlying loci and effect distribution may change under various evolutionary regimes (Orr 2001; Slate 2005; Hansen 2006; Mackay *et al.* 2009). In this section, we describe how various factors can contribute to the (perhaps, effective) number of causative loci, and the distribution of effects underlying continuously distributed adaptive traits, beginning first with aspects of the architecture itself (gene action), and concluding with explanations of how various processes (e.g., selection) play an influential role in the evolution of underlying genetic architectures. We then compare these expectations with results from genotype-phenotype associations in trees. While we discuss these examples in isolation, we highlight the fact that the underlying biological processes are often not independent.

### ***Gene action***

The classical genotype-phenotype map is largely one of additive effects, and is represented by a statistical regression of the phenotype on genetic content, as developed by Fisher (1918) and extended by others (e.g., Cockerham 1954; Kempthorne 1954). Indeed, much of the work done in trees has relied on such additive effects to describe heritable and quantitative genetic variation (see previous section). In this model, the phenotypic variance is partitioned into orthogonal (i.e., independent) contributions from the genetic variance ( $V_G$ ), environmental variance ( $V_E$ ), and the variance due to interaction between genotype and environment ( $V_{G \times E}$ ; see Box 1). Further,  $V_G$  is also the sum of orthogonal variance components, each term representing a different form of gene action. The additive term designates the associated variance contribution of independent alleles, with the dominance term designating



the non-additive contribution to variance of interactions among alleles at the same locus, and the epistatic term designating the contribution to variance of non-additive interactions among alleles at different loci (which can take one of many forms such as additive by additive, additive by dominance, etc.; Lynch & Walsh 1998). As a result, non-additive gene action is minimized as non-linear contributions to the overall phenotype (Moreno 1994; Whitlock et al. 1995) that contributes little to the distinction of the different forms of dominance and epistasis (Cheverud & Routman 1995; Hansen & Wagner 2001; Hermisson et al. 2003; Hansen 2006; Mackay 2014) nor towards the inference of aspects of the underlying genetic architecture in general (Nelson et al. 2013; Huang & Mackay 2016).

These statistical conveniences afforded by Fisher and others led to the notion that such non-additive effects were transient (i.e., are due to LD, which will decay with the relaxation of selection), or that trends of statistical epistasis were representative of functional epistasis in general, and therefore epistasis was unimportant to evolutionary dynamics (e.g., Bulmer 1980; Crow 2008, 2010; Hill et al. 2008). While minimized in a statistical regression, this does not necessarily mean that epistasis and dominance will not have a profound impact on the genetic architecture, or towards a given population or species' long-term evolutionary trajectory, even if statistical epistatic variance is minimal (Goodnight 1988; Chevrud & Routman 1995; Hansen & Wagner 2001; Hansen 2013; Nelson et al. 2013; Griswold 2015; Paixão & Barton 2016). Indeed, parameterizing a model in which the type I sums of squares is determined by non-additive parameters, as opposed to additive variance in the conventional regression model, the majority of genetic variation is still captured by the primary effect in the model regardless of the underlying architecture (Huang & Mackay 2016). Given the prevalence of evidence for non-additive contributions (e.g., Phillips 2008; de Visser et al. 2011; see also refs in Hansen 2013), it is likely that non-additive effects will play a role in evolutionary outcomes. Indeed, Carter et al. (2005) show that, relative to a purely additive trait (or with non-directional epistasis) under directional selection, positive and negative epistasis can respectfully increase or decrease the

Lind *et al*: Are we out of the woods yet?

additive genetic variance, and thus increase or decrease the rate of phenotypic response to selection (see also Le Rouzic & Álvarez-Castro 2016). As Jones et al. (2014) show, for a two-trait phenotype controlled by pleiotropic and epistatic effects, epistasis in the presence of selection can also affect the mutational architecture of complex traits, where the average allelic effect evolves to be negatively correlated with the average epistatic coefficient, the strength of which is greater in larger population sizes. Yet, as described by Barton et al. (2016), and further discussed by Barton (2017) and Paixão & Barton (2016), the infinitesimal model can be generalized to include epistatic effects, particularly when the number of underlying loci is large and selection on individual loci is weak. In the case of non-systematic, weak pairwise epistasis, and without mutation or environmental noise, the infinitesimal model holds to a good approximation (Barton et al. 2016). In the case of sparse epistasis with selection and a large number of loci, the change in the mean trait over 100 generations is greater than that under a purely additive architecture, and the decrease in additive genetic variance exceeds, to an extent, that of the neutral case after about 30 generations (which is exacerbated with simpler architectures), with a reduction of the frequency of segregating alleles with positive effect on the trait (Barton et al. 2016; Barton 2017). Despite an ongoing debate within the literature (Wright 1932; Whitlock 1995; Crow 2008, 2010; Gibson 2012; Zuk et al. 2012; Hansen 2013; Hemani et al. 2013; Nelson et al. 2013; Mäki-Tanila & Hill 2014; Ávila et al. 2014; Paixão & Barton 2016), and given that there seems to be no general prevalence of either positive or negative epistatic interactions (Mackay 2014), the infinitesimal model is likely to continue to contribute to our understanding of the evolution of complex traits, as exemplified in its application towards breeding applications (Turelli & Barton 1994) and specifically those successfully applied to trees (Savolainen et al. 2007; Thavamanikumar et al. 2013; Isik et al. 2015). Ultimately, the success of such models will be conditioned on the context, as well as the distinction between physiological and statistical epistasis. Here, (higher order) non-additive contributions to phenotypic variance will likely have minimal deviations from the limit of the infinitesimal model in

the short-term, particularly if epistasis is primarily due to independent, low-order interactions, and should thus be applied with this in mind. As such, while short-term evolutionary processes are likely to hold in this limit, identifying the non-additive loci which underlie the trait, and their respective gene action, may still need further inquiry. Indeed, it is often argued that epistasis is too often neglected in studies of complex traits (e.g., Carlborg & Haley 2004), possibly due to the large sample sizes required to detect significant interactions, and lack of statistical power incurred due to multiple hypothesis testing (Mackay 2014). Given the recent reduced cost of sequencing technology and availability of novel computational and laboratory tools, future studies incorporating investigations of epistasis and dominance (where appropriate and feasible) would contribute to our understanding of genetic architectures and quantitative trait evolution and breeding applications in trees (e.g., Tan et al. 2017, Vitezica et al. 2017). Even so, the additive model is still a powerful tool to describe the loci underlying adaptive traits.

Pleiotropy is another considerable factor influencing the expectations of the genetic architecture of quantitative traits, its evolution or evolvability, and indeed the genotype-phenotype map (Hansen 2003; Orr 2006; Chevin et al. 2010b; Tenallion 2014). While multiple definitions exist across the literature (see Paaby & Rockman 2013), pleiotropy is generally identified as a single locus influencing multiple phenotypic traits. Other than linkage disequilibrium, pleiotropy is the fundamental cause of genetic covariance among phenotypes (Lande 1980). Given that the number of independent traits under selection is likely limited (Barton 1990), pleiotropy likely plays a substantial role in evolutionary dynamics. It is expected that as the number of traits,  $n$ , influenced by a locus increases, the probability of a beneficial mutation will decrease with the effect size of a mutation; where the effect size,  $r$ , relative to the distance to the phenotypic optimum,  $d \cdot n^{-1/2}$ , must be (much) less than  $d$  in order to be beneficial (Fisher 1930; the so-called ‘cost of complexity’: Orr 2000). Yet, empirical data seem to contradict this hypothetical cost, as the effect size of mutations often do not scale with pleiotropy in this way, and instead increase with the dimensionality of targeted traits (Wagner et al. 2008;

Wang et al. 2010). Additionally, universal pleiotropy, where all mutations affect all phenotypes, and where there is no net directionality of mutations (i.e., mutational isotropy; both aspects as in Fisher 1930), has also been challenged by findings which suggest that only a fraction of phenotypic traits are affected by pleiotropic loci (Wagner et al. 2008; Wang et al. 2010). Relaxation of such assumptions from Fisher's geometric model have shown that the total number of traits affected by pleiotropy has a relatively decreased effect on the rate of evolution in more general models (e.g., Martin & Lenormand 2006; see also Simons et al. 2017, and references in Wagner & Zhang 2011 and Tenaillon 2014). It seems that if model organisms (e.g., Pickrell et al. 2016, Smith 2016) are taken as a bellwether for expectations in trees, pleiotropy is likely a contributing factor for many quantitative traits. Thus, the fraction of beneficial mutations is likely limited when the number of traits influenced is large, suggesting that the cost of complexity (or, more precisely, pleiotropy) may be generally robust (Welch & Waxman 2003), particularly when a population is close to its phenotypic optimum where selection acts against dimensionality of pleiotropic effects (Zhang 2012). Thus, the degree of pleiotropy for underlying loci, distance from phenotypic optima, and covariance among traits under selection can have profound effects on evolutionary outcomes. This is particularly true for the evolvability of architectures and distribution of effect sizes, which further depends on the variational autonomy of the traits affected by pleiotropy and the modularity of mutations, the former of which is ultimately determined by the direction and size of effect among a set of pleiotropic loci across a set of characters (see Arnold 1992; Wagner & Altenberg 1996; Hansen 2003, 2006; Wagner et al. 2007; Chevin et al. 2010b; Wagner & Zhang 2011; MacPherson et al. 2015).

In many investigations of local adaptation, the primary interest is in trait evolution and thus the underlying genetic components. As such, environmental effects and interactions are not often pursued, or perhaps even detected (Yoder & Tiffin 2017), particularly in studies of a single common garden or environment, and are instead treated in much the same way as

epistatic interactions discussed above. Nonetheless, genotypic effects can evolve through genotype-by-environment interactions with a changing environment just as is the case for the evolution of non-additive interactions with a changing genetic background (Hansen 2006). Indeed, it is likely that consistent fluctuations in the environment would select for environmentally-perceptive responses, which seems to be the case across many tree species (Li et al. 2017). The contribution to the effect size distribution from GxE interactions will be a function of the variation in selection across the environments experienced by the interacting allele or alleles as well as the level of gene flow between environments and fitness differences among various genetic backgrounds, but to our knowledge such information (to the extent of that for e.g., selective sweeps) is lacking within the literature.

### *Negative selection*

Negative selection acts against deleterious mutations that arise within populations. It is one, but not the only, mechanism that underlies stabilizing selection, defined at the level of the phenotype where deviations from an optimal value are selected against. Optima in this framework can be thought of either globally (i.e., across all individuals) or locally (i.e., individuals at a certain site or within a certain population), where the latter can have varying optima across populations. The nature of the optima (i.e., being local or global) affects the detectable trait architecture. For example, trait architecture should be composed of rare alleles with a negative relationship between effect size and allele frequency (cf. Eyre-Walker 2010 and references therein), where this relationship can also be confounded with degree of dominance and gene expression network connectivity (Huber et al. 2017), under models of a single global optimum. From a population genetic perspective, the ubiquity of negative selection is encapsulated in the name background selection, which has extensive reviews about its presence in natural systems (Charlesworth 2013), its importance for the neutral and nearly neutral theories of molecular evolution (Ohta 1992, 1996), and its contribution to observable patterns of hitchhiking (Stephan

2010). Important for the study of polygenic adaptation and its architecture, however, is that loci identified using GWAS may also include segregating deleterious variation (as argued and hinted at in Eckert et al. 2013b; cf. Yang et al. 2017; Gazal et al. 2017) as this creates trait variance, with little known about their prevalence (including differential prevalence across traits), differentiation in frequencies across populations (but see Holliday et al. 2016), and effects on downstream inferences about divergent selection pressures across populations. It is sets of GWAS loci, though, that are currently analyzed for signatures of local adaptation via spatially divergent (i.e., locally positive) natural selection (e.g., Berg & Coop 2014).

Recent exemplary work with expression networks in *Populus tremula* L. (Salicaceae; Mähler et al. 2017) and the herbaceous *Capsella grandiflora* Boiss. (Brassicaceae; Josephs et al. 2015, 2017a) have revealed intriguing insight into the effects of negative selection on the architecture of complex traits in plants, as well as the relationship between network connectivity and the strength of negative selection. In *P. tremula*, genes with expression levels that were significantly associated with sequence variation were found more often in the periphery of the co-expression network (lower network connectivity) than within network module cores (higher connectivity), while expression-associated SNPs were negatively correlated with network connectivity and effect size, a pattern also found between connectivity and expression variance, and minor allele frequency and QTL effect size (Mähler et al. 2017). Genes associated with sequence variation had less skewed site-frequency spectra (i.e., the frequency distribution of allelic variants) and lower estimates of nonsynonymous to synonymous divergence ( $d_N/d_S$ ) than genes not associated to sequence variation, together suggesting that genes within the periphery of co-expression networks are likely under less selective constraint than those genes with high network connectivity which likely experience greater intensities of purifying selection. These genes thus tend to have more segregating variation and may be those most likely to be detected with current sample sizes utilized in GWAS, which has implications for estimation of trait architecture and its ‘degree’ of polygenicity. Even so, while there is prevalent evidence of

negative selection in trees (e.g., Krutovsky & Neale 2005, Palmé et al. 2009, Eckert et al. 2013a,b), more inquiry is needed.

### ***Positive selection***

The temporal and spatial heterogeneity of selection can impact the evolution of genomic architectures underlying adaptation. These impacts are often thought of on a spectrum of trade-offs, with one end being antagonistic pleiotropy where allelic effects vary between positive and negative on fitness across populations, and conditional neutrality where allelic effects on fitness are positive in one or more populations and nearly zero in others (Anderson et al. 2012, Savolainen et al. 2013). For instance, alleles incorporated into a population after a shift in environmental influence can increase from low to high frequency via positive selection. The existence of such a beneficial allele can manifest in several ways: from new mutations, introgression through gene flow, or molecular reorganization through novel recombination, inversion, transposition, copy number variation, or insertion-deletion events. If there is strong selection acting on this allele ( $N_e s \gg 1$ ), it will sweep to high frequency creating a signature of reduced polymorphism at neutral sites physically linked to the allele ('genetic hitchhiking', Maynard Haigh & Smith 1974) resulting in a hard 'selective sweep' (Berry et al. 1991). However, in structured populations with limited gene flow, this process can take significantly longer to reach fixation, resulting in incomplete sweeps (Whitlock 2003). Additionally, Pavlidis et al. (2012) found that, in congruence with Chevin & Hospital (2008), a multilocus genotype often prevents the trajectories of individual alleles from sweeping to fixation, with an increasing number of loci leading to decreasing probability of fixation, and as a result, an altered selective signature at such loci (see also Jain & Stephan 2017). As such, hard selective sweeps in a polygenic architecture are expected to be rare (but not completely absent) under most circumstances, particularly when the shift in environment causes a relatively small deviation from the phenotypic optimum. Thus, hard sweeps most likely apply to loci with relatively large



effect above a calculated, context-dependent threshold value (Orr 2005; de Vladar & Barton 2014; Stephan 2015; see specifically Jain & Stephan 2015, 2017).

While early literature (Maynard & Smith 1974; Kaplan et al. 1989) focused on the rapid sweep of an allele incorporated into a population after an environmental shift, research within the last few decades have focused on ‘soft sweeps’ resulting from neutral or deleterious mutations that are present in the standing genetic variation prior to the change in the selective environment, wherein the selection coefficient changes with the environmental shift such that the allele(s) become evolutionarily advantageous (Innan & Kim 2004, Przeworski et al. 2005, Berg & Coop 2015; Schrider & Kern 2017; reviewed in Hermisson & Pennings 2005, Barret & Schluter 2008, Messer & Petrov 2013, and Hermisson & Pennings 2017; see also Jensen 2014). These allele(s) could manifest via a single low-frequency variant, multiple variants caused by parallel recurrent mutation/reorganization on multiple haplotypes, or multiple unique alleles that arise independently within, perhaps multiple, populations. In such cases where selection acts via soft sweeps, the rate of evolution at the phenotypic level is expected to exceed those of hard sweeps because the alleles under selection have escaped the stochastic nature of drift to a greater degree and are segregating within multiple individuals and genetic backgrounds within the population (Innan & Kim 2004). The extent to which soft sweeps alter the effect size distributions underlying the genetic architecture is likely dependent upon both the strength of selection and effect size before and after the environmental change (Messer & Petrov 2013; Matuszewski et al. 2015; Jain & Stephan 2017), while the frequency before selection influences the likelihood of subsequent detection (Innan & Kim 2004). Additionally, if multiple mutations are segregating during the sweep, the probability of fixation for any given locus also decreases (Pennings & Hermisson 2006a, 2006b; Chevin & Hospital 2008; Ralph & Coop 2010). For many species of trees, which often experience high gene flow and strong diversifying selection across populations, adaptive divergence for polygenic traits is expected to result more often from soft sweeps than hard sweeps, affecting phenotypes by subtle allele



frequency changes across populations, such that allele frequency differences of individual loci across populations for neutral and selective sites will often be nearly indistinguishable (Latta 1998, 2003; Barton 1999; Kremer & Le Corre 2012; Le Corre & Kremer 2012; Stephan 2015; Yeaman 2015; Jain & Stephan 2015, 2017). Indeed, the large effective population sizes found in most tree species would permit large effective mutation rates (or reorganization events) necessary for a soft selective sweep from multiple unique variants, particularly when the phenotype is underlain by a large mutational target (i.e., many loci). Even so, and as highlighted by Stephan (2015) and Bailey & Bataillon (2016), the extent to which scientists can detect the influence of demographic processes on soft versus hard sweeps, and vice versa, remains challenging (Jensen et al. 2005; Chevin & Hospital 2008; Hancock et al. 2010; Pritchard et al. 2010; Schrider et al. 2015, 2016; Schrider & Kern 2016; Hermisson & Pennings 2017).

While discrete directional selection events are likely to be a common evolutionary influence across taxa, fluctuating or sustained directional selection (i.e., moving optima) are also likely to be contributory factors influencing the genetic architecture of quantitative traits (reviewed in Kopp & Matuszewski 2013; see also McCandlish & Stoltzfus 2014). For a sustained moving optimum, the effect size distribution of beneficial alleles is expected to be dependent upon the effect distribution of standing or *de novo* mutations as well as the strength of selection: if the rate of change is dramatic, adaptation from new mutations is expected to occur through intermediate to large-effect loci (Kopp & Hermisson 2009a; Matuszewski et al. 2014) or from small-effect loci when adaptation occurs via standing variation (particularly when epistasis is considered, Matuszewski et al. 2015). Under lesser rates of environmental change, adaptation is expected to proceed through mainly alleles of small-effect (Collins et al. 2007; Kopp & Hermisson 2009a, 2009b) where intermediate effects will dominate the long-term distribution of effect sizes of an adaptive walk (Kopp & Hermisson 2009b). In the case of fluctuating environments, outcomes often depend directly on the degree of temporal autocorrelation of the changing environment. In such cases of stochastic fluctuation around a

linear trend of environmental change, extinction risk increases relative to that of the strictly linear trend (Bürger & Lynch 1995) where local adaptation lags, to some degree, behind any given contemporaneous scenario. In comparison, and similar in some ways, stochastic fluctuations around a constant mean are expected to resemble the dramatic environmental change scenario described above, characterized by strong selection pressures, maladaptation between generations, and a large lag load (Bürger 1999; Chevin 2012; Kopp & Matuszewski 2013). In the case of autocorrelated shifts, the ‘predictability’ of such fluctuations may decrease the possibility of extinction, increase probability of local adaptation, and lead to similar scenarios as discussed for gradual changes in the environment (Kopp & Matuszewski 2013).

## *Gene flow*

Gene flow, to the extent that would be appreciable to that found in trees, is also an important component shaping quantitative expectations. Indeed, since the early 1900s we have known that gene flow can disrupt adaptation if selection is not strong enough to overcome the loss of beneficial alleles (Haldane 1930; Wright 1931; Slatkin 1987; reviewed in Felsenstein 1976, Lenormand 2002, Savolainen et al. 2007, 2013, Feder et al. 2012a, and Tigano & Friesen 2016). Particularly when gene flow is asymmetric between core and peripheral populations, adaptation can be inhibited in marginal habitats (Kirkpatrick & Barton 1997; Kawecki 2008). Even so, there is abundant evidence that gene flow can promote adaptation and maintain polymorphisms within populations, including *Heliconius* butterflies (Joron et al. 2011), white sand lizards (Laurent et al. 2016), stick insects (Comeault et al. 2014, 2015), cichlid fishes (Meier et al. 2017), Darwin’s finches (Lamichhaney et al. 2015), as well as lodgepole pine (Yeaman & Jarvis 2006). There is also evidence to suggest that as the number of traits experiencing spatially heterogeneous selection increases, the degree of local adaptation increases, even with considerable gene flow (MacPherson et al. 2015). The magnitude of gene flow between populations can also impact the distribution of effect sizes, for when gene flow

falls below a critical threshold, and over many thousands of generations, there is an increase in the probability of establishment and persistence times of large-effect alleles, thus reducing the proportion of the polymorphism due to small-effect loci (Yeaman and Otto 2011; Yeaman and Whitlock 2011). These dynamics are further influenced by the susceptibility of alleles to 'swamping' (Slatkin 1975; Bürger & Akerman 2011; Lenormand 2002; Yeaman 2015; *sensu* Haldane 1930). For alleles that are prone to swamping, adaptive phenotypic divergence depends on genetic variation and is driven by allelic covariance among populations particularly when the underlying architecture is highly polygenic, the mutation rate is high, and the number of loci underlying the trait exceeds the number needed to achieve the local optimum phenotype (genetic redundancy, Yeaman 2015; see Goldstein & Holsinger 1992). Conversely, when there is little genetic redundancy underlying the trait, limited divergence is observed unless the effect size of a given swamping-prone allele exceeds the critical migration threshold. In these cases where swamping-prone alleles contribute to adaptive divergence, the genetic architecture is transient and any given locus contributes ephemerally to phenotypic divergence, even for loci of relatively large effect (Yeaman 2015). In the case of swamping-resistant alleles, the evolved architecture is enriched for large-effect loci and adaptive divergence can be maintained with little genetic variation or input from mutation. Yet while the contribution from such loci can last many thousands of generations, the architecture can again become transient as the genetic redundancy or mutation rate increases (Yeaman and Whitlock 2011; Yeaman 2015).

Physical linkage and reduction of recombination between adaptive loci can also play a considerable role in adaptive processes in the face of gene flow (Feder & Nosil 2010; Feder et al. 2012a,b; Yeaman 2013; references therein). In such cases, loci that are tightly linked to other loci already under selection will have an increased probability of contributing to local adaptation, both because of physical linkage as well as by reducing the effective recombination among loci within the sequence block. For instance, Yeaman & Whitlock (2011) showed that under divergent selection with gene flow, the number of contributing loci decreases with increasing

Lind *et al*: Are we out of the woods yet?

recombination while small effect loci tend to cluster in groups that act as a single large effect locus (see also Remington 2015), and strong selection can maintain these clusters of linked loci over greater map distances than can weak selection. More recently, Yeaman (2013) employed individual-based simulations to provide evidence that the clustering of alleles throughout a bout of adaptation is unlikely to be driven mainly by divergence hitchhiking alone, and that instead competition between genomic architectures and chromosomal rearrangements occurring throughout adaptive processes under a range of environmental fluctuation scenarios can lead to the evolution of tightly clustered adaptive loci which persist in the event of gene flow, unlike the clusters identified by Yeaman & Whitlock (2011). Yeaman (2013) found that the level of clustering was a function of the temporal fluctuation period, the rate of rearrangement itself is an important determinant on the evolution of clustered architectures, and clusters can in some cases be evolutionarily disadvantageous. Together, these results suggest that genomic rearrangements (reviewed in Ortiz-Barrientos et al. 2016), including inversions (Kirkpatrick & Barton 2006; reviewed in Hoffman & Rieseberg 2008), which decrease the effective rates of gene flow among adaptive sequences can be an essential component of local adaptation, and indeed some cases of speciation, in the face of gene flow.

## ***Summary***

While we provided an overview of the factors that can influence the genetic architecture of local adaptation, we acknowledge that it is far from exhaustive. Because the phenotypes used in studies of local adaptation (particularly those assumed or corroborated to be a component of total lifetime fitness) often have a continuous distribution, and are thus quantitative in nature, the underlying genetic basis for these traits is likely polygenic and is predicted to be underlain by multiple (often many) segregating loci, many of which may confer small phenotypic effects (and are thus unlikely to be detected using single-locus approaches). Even so, a continuum exists, where the true genetic architecture (the number of contributing

loci, as well as their relative locations within the genome, phenotypic effects, and interactions) underlying a given complex trait is itself determined by a combination of evolutionary forces that encompass an interplay between the strength, timing, and direction of (background) selection against the homogenizing effects of gene flow and recombination, disruptive effects of drift, linkage, transposition, inversion, and mutation, interactions between underlying loci as well as between these loci and the environment, structural variation, relationship to gene expression networks, as well as other factors related to life history. Consequently, the contemporary genetic architecture is a result of past evolutionary processes, while the adaptive response to future evolutionary dynamics is influenced in part by the contemporary architecture and genetic variance at hand.

## **The genomics of local adaptation in trees**

### ***Common approaches used to identify adaptive loci***

Across taxa, the predominant association and outlier methods for uncovering sets of loci underlying local adaptation have relied upon single-locus population genetic approaches. Putatively adaptive loci are often identified by elevated allele frequency differences among populations relative to a null model. Because most of the loci in the genome are assumed to be neutral relative to fitness, outlier loci that stand out from this noise are identified as those being putatively under selection. However, outlier tests based on  $F_{ST}$  (*sensu* Lewontin & Krakaur 1973) do not incorporate information regarding putative phenotypic targets of selection nor environmental drivers of differentiation, often do not correct for neutral population structure (but see Lotterhas & Whitlock 2015), and will inevitably isolate a biased set of candidate loci (Hermisson 2009; Cruickshank & Hahn 2014). In the case of genotype-environment associations (reviewed in Rellstab et al. 2015; see also De Mita et al. 2013), information about possible environmental drivers is incorporated by assessing the association between allele frequencies and environmental heterogeneity, yet without information regarding traits

hypothesized to be influenced by selection (Schoville et al. 2012). Single-locus genome wide association studies (see supplemental box SB1) and quantitative trait loci (QTL) experiments (reviewed in Ritland et al. 2011, Hall et al. 2016) have also been used in such investigations, quantifying the differential effects of typed alleles on a given phenotype. In these cases, a common garden or reciprocal transplant design (discussed above) can be utilized to control for, or at least minimize, environmental effects on the studied phenotypes, while a pedigree is used to minimize false associations and to isolate linkage groups, and/or to predict parental phenotypes through regression analysis of progeny. Despite the shortcomings of these methods, such studies provide candidate loci that can be investigated in further detail, which is particularly advantageous when resources are limited. Indeed, as discussed below, these single-locus approaches dominate the methods used to uncover complex traits (adaptive or otherwise) in trees.

### ***Current progress in trees***

The knowledge gained through the descriptions of genetic architectures underlying complex traits has fundamental implications for the success of conservation and breeding strategies. In light of the expectations outlined above for the architecture of quantitative traits under various evolutionary regimes, and the methods commonly used to detect these loci, we reviewed the literature of single-locus genotype-phenotype associations (GPAs, which included associations to gene expression levels) from studies in forest trees. In doing so, we identified 52 articles across 10 genera and 25 species with a total of 2121 GPAs (Supplemental Table S3, Supplemental File F2). Because most studies in trees do not report phenotypic effect sizes of individual loci (i.e., regression coefficients), we report  $r^2$  values which can be used to quantify the percent phenotypic variance explained by the associated locus. In cases where multiple SNPs from a given locus (e.g., a gene or scaffold) were associated to a trait, we averaged the  $r^2$  values for that locus. As with our review of trait heritability and  $Q_{ST}$ , we grouped phenotypic

traits used in associations into twelve broad categories (in this case, no phenotypes fell into Survival or Seed and Seedling Properties groups). Across these trait groups, the mean  $r^2$  was 0.039, where 80.85% ( $n = 1715$ ) of recorded estimates had  $r^2$  values less than 0.05, 18.71% ( $n = 397$ ) of  $r^2$  values falling between [0.05,0.22], and nine values of  $r^2$  greater than 0.22, which were all related to *Cronartium ribicola* resistance in *Pinus monticola* Douglas ex. D. Don (Figure 3).

Of the twelve trait groups, all but those traits relating to both reproduction and herbivore and insect resistance had  $r^2$  estimates greater than 0.10, with traits relating to disease resistance, growth, leaf and needle properties, phenology, and wood properties each contributing over 10% of these outliers. These small effects tend to also not account for much of the observed heritability, but can explain sizeable fractions in some instances (e.g., primary metabolites in Eckert et al. 2012). Of the loci associated with expression levels,  $r^2$  estimates were between 0.05 and 0.152 in all but one case ( $n = 54$ ). We also assessed the propensity of individual loci to be associated to more than one phenotype or expression level across our literature review. Without correcting for the multiple associations of a locus to yearly phenotypes (e.g., bud flush 2009, bud flush 2010), we found that the average number of loci associated to multiple phenotypes per study was 6.94, while after correcting for multiple years the average number decreased to 5.59. The median number of SNPs utilized for association per study was 195, where 75% (39/52) of studies used less than 1,000 SNPs, eight studies using less than 10,000 SNPs, four studies using between 29,000-35,000 SNPs, and one study utilizing 2,822,609 SNPs for association (all studies with greater than 10000 SNPs were from either *Pinus* or *Populus* species). Finally, to explore influence of sample size on estimated percent variance explained across studies we examined the relationship between  $r^2$  estimates and the number of maternal families used in estimate calculations and found a positive but non-significant relationship ( $\rho = 0.0735$ ,  $P = 0.623$ ).



## *Are we out of the woods yet?*

From insight gained from the literature review of genotype-phenotype associations it seems that the vast majority of the genetic architecture of local adaptation and complex traits in trees remains largely unexplained using common methods, a consistent pattern across the past decade of research in trees (Neale & Savolainen 2004; Savolainen et al. 2007; Čalić et al. 2015; Hall et al. 2017). Furthermore, it is likely that the estimates for percent variance explained are inflated due to a combination of QTLs that break down into smaller effect loci (Remington 2015), the Beavis effect (Beavis 1994; Xu 2003), and the Winner's Curse (Görning et al. 2001; Zöllner & Pritchard 2007) where locus effects are inflated by using the same data for both gene identification and phenotypic prediction (see Box 1 in Josephs et al. 2017b for a detailed synopsis of these biases). Such a pattern suggests that, indeed, many of the traits important to evolutionary, breeding, and conservation insight in trees are likely of a polygenic basis and that future studies must take this into account when seeking to identify the underlying loci.

For GWAS and QTL studies, even within studies of model organisms, missing heritability is nothing new. Across taxa, missing heritability is less frequent within phenotypes of mono- to oligogenic bases (as seen for the *Cr2* major-gene resistant locus in *Pinus monticola*, Lui et al. 2017), as would be expected, and is a recurrent, pervasive shortcoming from genotype-phenotype associations of complex traits, particularly those maintaining single-locus perspectives. A number of explanations have been put forth to explain the missing heritability, such as epistasis (Hemani et al. 2013) and its inflationary effect on heritability estimates (Zuk et al. 2012), environmental or epigenetic interactions (Feldman & Lewontin 1975) as well as their inflationary effect on heritability estimates (Zuk et al. 2012), (unmeasured) low-frequency variants of large effect (Dickson et al. 2010), genetic or variance heterogeneity of individual alleles (Leiserson et al. 2013; *cf.* Box 1 in Nelson et al. 2013), or common variants with effect size below detection thresholds (Yang et al. 2010). As such, here we avoid supporting one



Lind *et al*: Are we out of the woods yet?

causative hypothesis over another, particularly given the ongoing discussion within the literature, for which strengths and weakness for any viewpoint are apparent (e.g., Gibson et al. 2010), and because of the progress yet to be made in trees.

Indeed, the dissection of the genetic architectures underlying complex traits in trees is still in its nascency compared to the progress of model organisms (for which missing heritability is still an issue), and beyond issues of coverage, genomic saturation, and genomic resources (discussed below in The Path Forward), we must approach this issue with all possibilities in mind. Given the unique properties of the life histories, genome size and organization of many tree species, and the limited numbers of studies with large sets of molecular markers, causative sources of the missing heritability should be ruled out, or supported, as with any other hypothesis, particularly as we gain information from contemporary studies of trees that address shortcomings of those in the past. Further, we must keep in mind differences between functional and statistical epistasis (Álvarez-Castro et al. 2007; Nelson et al. 2013; Huang & Mackay 2016). In any case, it seems that sample sizes will need to be increased (Hall et al. 2016), albeit with diminishing returns (Boyle et al. 2017; Simons et al. 2017), to discover a higher proportion of the underlying loci in trees due to small to moderate additive effects, so incorporating investigations into such aspects of epistasis, GxE effects, and network analyses (when appropriate), may be a worthwhile complement (e.g., Mähler et al. 2017, Mizrachi et al. 2017; Tan et al. 2017).

While the infinitesimal model will continue to prove to be immensely useful for breeding programs and for short-term evolutionary predictions, and we may find that the missing heritability in trees is truly due to consequences of the infinitesimal regime (as is often cited to be the majority consensus across taxa for missing heritability), it has been argued that the analysis paradigm for such studies is near its limits in describing the functional genetic architecture of quantitative traits, and that it is therefore necessary to move beyond single-locus perspectives and reconsider common practices (Pritchard & Di Rienzo 2010; Nelson et al. 2013; Sork et al. 2013; Tiffin & Ross-Ibarra 2014; Wadgyamar et al. 2017). At this stage, it seems that

we investigators seeking to describe the genetic architecture of quantitative traits in trees have some ways yet to go before we are truly out of the woods. In the next section, we describe the path forward to describing genetic architectures from a polygenic and functional perspective, identify resources available to advance our knowledge and fill knowledge gaps, as well as future directions for this research area.

## **The Path Forward**

As we have outlined, there is still ample room for improvement in our description and understanding of the genomic architecture of quantitative traits in trees. In this section, we orient our path forward by first highlighting utilities available to, and underused within, the forest genetics community to describe the genetic architecture of complex traits. We then outline several suggestions to facilitate further progress and advocate for prospective perspectives in future studies such that information and data may continue to be used easily in subsequent syntheses across pathways, environments, species, and towards insight to identify future needed resources as our understanding progresses. While our recommendations are specific to the tree community, we also acknowledge other valuable recommendations from recent reviews (e.g., Savolainen et al. 2013; Tiffin & Ross-Ibarra 2014; Lotterhos & Whitlock 2015; Gagnaire & Gaggiotti 2016; Hoban et al. 2016; Wellenreuther et al. 2016; Burghardt et al. 2017; Wadgymar et al. 2017).

### ***Stepping off the path – what’s in our pack?***

The genetic architecture underlying local adaptation and complex traits likely has a polygenic basis composed of many loci of relatively weak effect yet many of the common association or outlier methods will often fail to detect many of the causative loci of small to moderate influence. Such investigations have so far led to an incomplete description of studied architectures, and, in many cases, have limited our understanding of complex traits in trees to a handful of loci. While we do not advocate that such single-locus methods be avoided in future

Lind *et al*: Are we out of the woods yet?

studies (considered further in the next section), here we outline underused and promising approaches to identify and describe underlying loci that explicitly take into account the polygenic basis of such traits and may help advance our understanding in future studies. Multivariate, multiple regression, and machine learning techniques are three such examples, and differ from univariate analyses by analyzing patterns among multiple loci simultaneously.

The Bayesian sparse linear mixed model (BSLMM), for instance, such as that deployed in the software package *GEMMA* (Zhou et al. 2013), is developed for both genomic prediction and mapping of complex traits that offers considerable advantages over single-locus genotype-phenotype approaches (Guan & Stephens 2011; Eheret et al. 2012; Zhou et al. 2013; Moser et al. 2015). This analysis has gained in popularity recently, being used across diverse taxa such as stick insects (Comeault et al. 2015, Riesch et al. 2017), butterflies (Gompert et al. 2015), Darwin's finches (Chaves et al. 2016), and trees (Lind et al. 2017). BSLMM is a hybrid of LMM and Bayesian variable regression that extends the Lande & Arnold (1983) multiple regression approach in an attempt to address the sparsity of common data sets used in genotype associations, where the number of model parameters (loci) is often much greater than the number of observations (sampled individuals; Zhou et al. 2013; Gompert et al. 2016). Specifically, the model takes into account relatedness among individuals and provides a means to summarize estimates of selection across the genome such as the proportion of phenotypic variation explained (PVE) across genotyped markers by estimating the combined influence of markers with either polygenic (infinitesimal) or measureable (moderate to large) effect, the proportion of PVE explained by genetic loci with measurable effects (PGE), and the number of loci with measurable effects that underlie the trait (for more details see Guan & Stephens 2011; Zhou et al. 2014; Gompert et al. 2016). Additionally, *GEMMA* returns the posterior inclusion probability for each marker providing evidence for association with the phenotype, and with sufficient genetic sampling PVE should approach the narrow sense heritability if all or most causal sites are in LD with genotyped loci (Gompert et al. 2016), a useful property considering

the uncertainties of genomic sampling saturation in trees. While the approach remains promising considering its performance in the context of genomic prediction and inference of PVE (e.g., Zhou et al. 2013, Speed & Balding 2014), there has been no attempts, to our knowledge, to assess the approach under various demographic histories, genetic architectures, and sampling designs. A close approximation to this comes from analyses carried out by Gompert et al. (2016), in which GEMMA was evaluated for PVE estimation, estimated effects of causative loci, and the estimated number of underlying SNPs based on various author-specified numbers of causal loci, underlying heritability ranges, and numbers of sampled individuals. In short, the authors convey that GEMMA is promising, but that there are important limitations to consider (Gompert et al. 2016). However, because the authors simulated architectures by randomly assigning effects to loci from an empirically-derived sequence data set, and while they were thorough in their data exploration, we encourage these results be replicated *in silico* through full modeling of genomic loci across various demographic, LD, sampling, and architecture scenarios to ensure underlying allele frequencies among populations and LD (within and among populations) reflect realistic patterns which may have an effect on model performance. Such additional analyses will also allow for more specific insight into model performance based on *a priori* biological insight available to investigators, allowing more informed decisions when choosing an appropriate genotype-phenotype association method such as BSLMM.

Random Forests (Breiman et al. 2001) is a machine learning algorithm used to identify patterns in highly dimensional data sets to further generate predictive models. Alongside uses outside of evolutionary biology, the Random Forests algorithm has gained popularity in association studies across taxa as well as in trees such as that of genotype-phenotype associations in Sitka spruce (*Picea sitchensis*; Holliday et al. 2012) and genotype-environment associations in white spruce (*P. glauca*; Hornoy et al. 2015). Random Forests is based upon classification (for discrete variables, e.g., soil type) and regression (continuous variables; e.g.,

910 temperature or phenotypic measurements) trees (so-called CART models). During its  
 911 implementation, Random Forests creates these decision trees using two layers of stochasticity:  
 912 the first layer is used to grow each tree by using a bootstrap sample of observations  
 913 (environmental or phenotypic) while the second uses a random subset of predictors (marker  
 914 loci) to create a node which is then split based on the best split of the observations across  
 915 permutations of predictors using the residual mean square error (see Figure 2 in Hornoy et al.  
 916 2015). The observations that were not used as training data to create the model are then used  
 917 to estimate model accuracy, which can be further used to assess variable importance (Holliday  
 918 et al. 2012; Hornoy et al. 2015; Forester et al. 2017). While creating a promising alternative to  
 919 univariate approaches, until recently the Random Forests algorithm has not been fully explored  
 920 to assess model performance for use in association studies. Forester et al. (2017) provide a  
 921 thorough analytical assessment using simulated data to remark on performance for use in  
 922 genotype-environment association studies (GEA). In their analysis, they used published  
 923 simulations of multilocus selection (Lotterhos & Whitlock 2014, 2015) of various demographic  
 924 histories and selection intensities across 100 causative (with 9900 neutral) loci to compare the  
 925 Random Forests algorithm to the multivariate approaches of constrained ordination (redundancy  
 926 analysis, RDA, and distance-based RDA, dbRDA - both of which are mechanistically described  
 927 in Legendre & Legendre 2012, but are multivariate analogs of multiple regression on raw or  
 928 distance-based data) and to the univariate latent factor mixed model (LFMM). In short, Forester  
 929 et al. (2017) found that LFMM performed better than Random Forests as a GEA, while  
 930 constrained ordinations resulted in relatively lower false positive and higher true positive rates  
 931 across levels of selection than both Random Forests and LFMM. Additionally, the authors found  
 932 that correction for population structure had little influence on true and false positive rates of  
 933 ordination methods, but considerably reduced true positive rates of Random Forests. They also  
 934 note that further testing is needed across various evolutionary scenarios. Even so, constrained  
 935 ordination provides an effective means by which to detect loci under a range of both strong and

weak selection (Forester et al. 2017). While promising under a GEA framework, future analyses may provide evidence that such methods also perform well in genotype-phenotype associations as well. Empirically, it has been used in trees to explore multivariate relationships between phenotypes, genotypes, and environments (e.g., Sork et al. 2016). Additionally, there have been many extensions of the original Random Forests model, such that extensions with purportedly better performance should be assessed alongside other popular association methods in the future.

Once a set of candidate loci have been identified to putatively underlie a phenotype or environment of interest, these loci can be used to further test the hypothesis of polygenic local adaptation. For instance, Berg & Coop (2014) use the significant hits from GWAS data sets to estimate within-population additive genetic values by calculating the frequency-weighted sum of effects across these loci. These values are then compared to a null model of genetic drift that accounts for population structure to test for an excess of variance among populations, ultimately identifying the populations most strongly contributing to this signal. The excess variance statistic ( $Q_x$ ) is analogous to  $Q_{ST}$  and is composed of two quantities – an  $F_{ST}$ -like component describing allele frequency differentiation across populations and a LD-like component describing coordinated and subtle allele frequency shifts across populations. This method thus allows explicit hypothesis tests related to the expected polygenic architecture of local adaptation across populations of trees. It is also noteworthy in that it combines aspects of the genotype-environment-phenotypic spectrum that underlies local adaptation within a single methodological framework (cf. Sork et al. 2013). Prior attempts take a pairwise approach examining each pairwise combination of the genotype-environment-phenotype spectrum (e.g., Eckert et al. 2015). Despite the promising insight from this method, it has not been used widely outside of model organisms. Future applications in trees should consider the number of causal loci identified to be associated with quantitative phenotypes (driven somewhat by the number of loci used in mapping studies), the number of populations needed to increase power, especially in

the correlation of genetic values to environmental data, and the ability to reliably estimate genotypic effects.

### *At the trail junction – where to next?*

While we have outlined methods above that have not yet realized their full potential in describing genetic architecture of complex traits in trees, there are several matters that we, as a field, must keep in mind such that we can continue to progress our understanding in the most efficient manner. Here we believe the path forward lies in three critical areas which we discuss in further detail below: 1) needed data, 2) standardized data reporting, and 3) empirical studies in trees designed to test theoretical expectations of genetic architectures.

### *Needed data*

While the common garden approach can facilitate understanding of evolutionary processes without specifically identifying underlying loci (Rausher & Delph 2015), identifying features of the genetic architecture will ultimately inform breeding applications important to management, conservation, and industry, and thus requires knowledge about underlying loci. Consequently, we have not yet had sufficient sampling of both marker densities and studies amenable to replication across systems to truly exhaust the use of single-locus approaches, particularly as the sample size of markers, individuals, and populations increase in the near future. Indeed, Hall *et al.* (2016) estimated that the number of causative loci underlying quantitative traits in trees is likely in the several hundreds, and to capture 50% of the heritable genetic variation, population sizes of about 200 will be needed for mapping disease traits, and about 25,000 for traits such as growth. Even so, we recommend that such single-locus associations should not be used as the sole method of architecture description as we carry out future studies unless justified *a priori* based on biological principles or knowledge of the expected architecture, and/or for testing specific hypotheses. While the limits of such methods



should be considered for a given study, these approaches can be used alongside other lines of evidence to either support or spur further testing of underlying loci (*sensu* Sork et al. 2013). For instance, there is little downside to performing both a single-locus association and a multivariate analysis in the same study, even if some or all of the results for a given technique are excluded to the supplemental section (e.g., Sork et al. 2016). Further, contextualizing genotype-phenotype and genotype-environment relationships with results that describe local adaptation (e.g., phenotype-environment,  $Q_{ST}$ - $F_{ST}$  comparisons) can also stimulate further understanding. Specifically, studies which do so within the context of a comparative approach, not only in the sense of Sork et al. (2013), but as well as within the context of comparisons within and across species (e.g., Yeaman et al. 2016) or environments (Holliday et al. 2016), offer unique circumstances under which to advance our understanding of complex traits (Lotterhos & Whitlock 2015; Čalić et al. 2016; Hoban et al. 2016; Ingvarsson et al. 2016; Mahler et al. 2017).

Considering the polygenic and network nature underlying such traits, future studies will benefit from a diverse set of markers that represent both functional proteins (genic regions) as well as those which control aspects of their expression or post-transcriptional regulation. If one lesson is to be gained from the recent discussion of the applicability of reduced representation techniques (Lowry et al. 2016; Catchen et al. 2017; Lowry et al. 2017; McKinney et al. 2017), it is that genomic resources are paramount to advancement of knowledge, especially when developed with knowledge of patterns of linkage disequilibrium or, if not with this knowledge, with goal of quantifying it. However, RADseq remains one of the most cost-effective approaches available to trees and should thus be assessed in the specific context of tree species, particularly when strengths and limitations are understood and addressed (as reviewed in Parchman et al. in review). No matter the approach used for association, some aspect of the architecture is likely to be missed in trees. For example, RADseq based markers developed within large genomes are not enriched within genic regions where structural changes to proteins are expected to affect phenotypes (although choice of enzymes can affect the relative



proportion of genic regions). In contrast, exome based approaches are anchored within coding regions thus excluding putative regulatory elements outside of the exomic regions used to develop probes. Recent marker development approaches, such as RAPTURE (Ali et al. 2016), however, have blurred the lines between RADseq and targeted capture-based approaches and offer a promising, cost-effective method that can explicitly avoid biased assumptions about the importance of exomic versus intergenic loci comprising the architecture of local adaptation.

Beyond genetic linkage maps (e.g., Friedline et al. 2015) and reference genomes, which undoubtedly should be among our top priorities, other techniques outside of traditional genomics, such as transcriptomics, have the potential to complement genomic studies in many ways without great need for existing species-specific resources (reviewed in Romero et al. 2012, Strickler et al. 2012; Vialette-Guiraud et al. 2016). For instance, comparative transcriptomic techniques in trees can be used to identify putatively orthologous sets of markers (e.g., Wachowiak et al. 2015; Yeaman et al. 2016) that can be used to describe the evolution of architecture (e.g., shared orthologs versus paralogs across species) or for comparative linkage mapping (Ritland et al. 2010) across systems. Additionally, with the appropriate study design, transcriptomics can be implemented in tree species to describe various aspects of differential expression (Cohen et al. 2010; Carrasco et al. 2017; Cronn et al. 2017), selective constraint (Mähler et al. 2017), prevailing selective forces (Hodgins et al. 2016), mapping of disease resistance (Liu et al. 2016; Liu et al. 2017), and regulatory networks (Zinkgraf et al. 2017). The multilocus paradigm of transcriptomics is amenable to identifying and testing hypotheses of the genetic architecture of complex traits in a network framework (Jansen et al. 2009; Leiserson et al. 2013; Civelek & Lusi 2014) and will no doubt provide valuable contributions for tree evolutionary biologists. Other areas amenable to network description such as metabolomics and proteomics would also be a complement, particularly if genetic studies contextualize results with findings from such approaches and vice versa. Ultimately the goal is to use *a priori* knowledge synthesized across past studies, techniques, and perspectives to guide further hypotheses

about underlying architecture, as exemplified by Mizrachi et al. (2017). Finally, high-throughput phenotyping as well as environmental measures at fine spatial scales below square-kilometers will also facilitate and advance our understanding of complex traits in trees (Sork et al. 2013; Rellstab et al. 2015; Leempoel et al. 2017).

### ***Standardized data reporting***

As we continue to accrue genotype-phenotype, genotype-environment, and phenotype-environment associations within and across tree species, authors should consider how their results can most effectively be used in further studies and syntheses, both for the purpose of validation or comparison as well as novel insights yet to be seen. Here we outline a few suggestions that can be broken down into reporting within manuscripts and metadata. For instance, in our survey of common garden studies used to estimate  $h^2$  and  $Q_{ST}$ , in many cases the exact design of the study could not be replicated with the information from the manuscript alone. While an abbreviated design may be suitable for the main text, authors can provide much more detail in supplemental materials that can facilitate replication and comparison across studies (e.g., total individuals per garden, family, or block – as opposed to averages or ranges), which will ultimately facilitate syntheses regarding future directions. Further, future studies would benefit from estimating relatedness using marker data which will ultimately improve the precision of  $h^2$ ,  $Q_{ST}$ , and missing heritability estimates (de Villemereuil et al. 2016). For cases in which estimating relatedness from markers is not appropriate or feasible, the field would benefit by authors exploring a range of underlying sibships (e.g., Eckert et al. 2015), which are often assumed to be half-sib relationships. While some studies in our survey assumed a mixed sibship relationship for open-pollinated sources, ultimately such assumptions without data exploration will affect the outcome or conclusions for any given study. A recently released R package by Gilbert and Whitlock (2014) allows for such an exploration of effects of mixed sibships on inference of  $Q_{ST}$  and its magnitude relative to  $F_{ST}$ . Inclusion of such exploration,

even in the supplement, will help contextualize such studies as they are published. For studies estimating causality for genotype to phenotype, it would be worthwhile to include the regression coefficients or other estimates of effect size in addition to PVE ( $r^2$ ). Importantly, the units of the effect size must be explicitly reported (e.g., Julian days versus phenotypic standard deviations), with the standard deviation also reported. For all association studies, supplemental tab- or comma-delimited text files (outside of a word processing document) easily analyzed with programming languages would also facilitate synthesis (even if providing redundant information from the main text), particularly if such files are well described with a README file and contained data regarding marker position, putative orthogroups, hits to reference genomes, effect size, PVE, genotypes by individual identifiers, individual population assignments, and if the sequence or marker was significantly associated to phenotype or environment. Such an operating procedure may work well in the short term, however in the long term such information will need to be easily accessible from one or very few repositories.

Data standardization, the inclusion of meta-information, and compilation of these data specific to trees into a database with common terminology will be crucial to future inquiries with the purpose of synthesizing evidence for underlying architectures across species and environmental systems (e.g., as for human GWAS data: <https://www.ebi.ac.uk/gwas/>). If the data generated by tree biologists is disparate and housed across databases and journal supplements this impedes synthesis first by forcing scientists to collate information across sources, which may be further impeded by data redundancies or inconsistencies in data format and utilized nomenclature (Wegrzyn et al. 2012). While many journals have required submission of sequence data to repositories such as NCBI, such databases are lacking with regard to information pertaining to phenotypic, environmental, and geographic information upon which much of the foundation of our field is built. Submissions to Dryad somewhat overcome this, but there is no standardization within the community for content for such submissions and important information may be lacking. Currently, this information is often appended in supplemental files

that cannot be readily accessed, compared, or queried in an efficient manner. Hierarchical ontologies can be used to ease this burden. Gene Ontology is likely the most recognizable to evolutionary biologists, but there also exist Plant Ontologies for organismal structure and developmental stages, Environmental Ontologies for habitat categorization, and Phenotypic, Attribute, and Trait Ontologies for the annotation of phenotypes. Such ontologies not only standardize nomenclature, but also assist in database queries. The utilization of such databases will no doubt encourage comparative studies and syntheses, as infrastructure and data accessibility are essential to the comparative approach (Neale et al. 2013; Ingvarsson et al. 2016; Plomion et al. 2016). Luckily, such a database exists for the broader tree genetics community. The open-source database, called TreeGenes, can be accessed, queried, and visualized through DiversiTree, a web-based, desktop-style interface (Wegrzyn et al. 2008). Further, DiversiTree connects to the geographical interface CartograTree (Vasquez-Gross et al. 2013) to encourage comparative synthesis by providing technology to filter and visualize geo-referenced biotic and abiotic data housed on TreeGenes. As promising as such databases are, they are only as useful as the data that is deposited to them. While TreeGenes will regularly import and enhance data from public repositories (through e.g., sequence alignment to published genomes), often pertinent metadata necessary for comparative synthesis is lacking (Wegrzyn et al. 2008, 2012). Indeed, from our survey of published GPA since the release of the database in 2008, less than 13% (6/48) of the studies submitted their data directly to TreeGenes. To better prepare for future synthesis, we advocate that authors submit their data to the TreeGenes database and that reviewers and editors enforce this habit, as currently implemented for linkage maps published in *Tree Genetics & Genomes*. Consolidated, open-source resources will be crucial to the advancement of this field (Neale et al. 2013), and will no doubt spur knowledge that would not have been recognized otherwise. Prime examples of advancement to knowledge because of these types of resources and community-wide efforts come from the human GWAS literature where such resources provide crucial information

1115 necessary to study polygenic adaptation (e.g., Berg & Coop 2014).

# 1116 *Empirical tests of theory*

1117 In combination with the development of truly genome-wide public resources, there is  
1118 need to use these resources to validate and better characterize foundational ideas and  
1119 assumptions in the theory of polygenic adaptation relative to the life history strategies of tree  
1120 species. For example, Gagnaire & Gaggiotti (2016) highlight that the degree of polygenicity can  
1121 be tested as a function of the number of GWAS hits relative to the length of contigs or  
1122 chromosomes containing these markers. Simple models of polygenicity predict that there should  
1123 be a positive correlation between these quantities. Thus, rather than assuming some functional  
1124 form of a polygenic architecture (i.e., an approximate infinitesimal model) during analysis,  
1125 researchers can strive to characterize, or at least exclude some forms of, the underlying genetic  
1126 architecture prior to interpretation. In a related fashion, publically available data sets would spur  
1127 comparisons across species and study systems to test hypotheses about polygenic  
1128 architectures (e.g., genomic organization, effect size distribution) due to the relative timing of  
1129 selection, degree of environmental contrast (e.g. diversifying selection and changes to the  
1130 strength of negative selection), selection strength, and level of gene flow across diverging  
1131 lineages. As an example, much of the theory of polygenic adaptation requires assumptions  
1132 about simplistic demographics (where violations have consequences for standing levels of non-  
1133 neutral diversity, e.g., Wang et al. 2017) and the equilibration among co-acting evolutionary  
1134 forces over a large number of generations (Brandvain & Wright 2016). Indeed, differing  
1135 architectures are expected as a function of the timing for the onset of selection (Le Corre &  
1136 Kremer 2003; Kremer & Le Corre 2012), with subtle allele frequency shifts across populations  
1137 dominating architectures near the onset of selection and larger allele frequency shifts much later  
1138 in time. While there is need for empirical validation of this theory, there is also a need to  
1139 characterize the prevalence of its predicted patterns across differing clades of tree species. In

other words, researchers could imagine testing the theory itself in natural populations (e.g., as begun by Le Corre & Kremer 2012) or assuming its validity and characterizing the circumstances under which to expect large shifts in allele frequencies across tree species with differing life history strategies. Little of any of this, however, will be possible without development of needed data and its deposition into publically available, standardized databases.

## Concluding Remarks

The path forward provides a means by which we can most efficiently describe the underlying genetic architectures of traits important to management, conservation, and industry, and will can ultimately be used to expedite breeding projects. The past evolutionary history will have a profound effect on the underlying genetic architecture of such traits, and thus strengths and weakness of the data and methods used to uncover such architecture should be specifically addressed in future investigations, particularly in how utilized methods perform across various demographic and architecture scenarios. Insights gained from empirically testing theory in trees will also contribute to the advancement of this field and will ultimately quantify the variation in architecture across environments and species and inform effective management. The future is bright, but we are not yet out of the woods. As such, efficient advancement in this field relies on community efforts, standardized reporting, centralized open-access databases, and continual input and review within the community's research.

Lind *et al*: Are we out of the woods yet?

## 1159 **Acknowledgements**

1160 The authors would like to thank Chris Friedline for stimulating conversations when developing  
 1161 content, and Justin Bagley for providing helpful comments to earlier versions of this manuscript.  
 1162 Brandon Lind is supported through a Dissertation Fellowship provided by the Graduate School  
 1163 of Virginia Commonwealth University. Andrew Eckert is supported through the National Science  
 1164 Foundation (EF-1442486) and the United States Department of Agriculture (USDA 2016-67013-  
 1165 24469).

## References

- Ali, O. A., O'Rourke, S. M., Amish, S. J., Meek, M. H., Luikart, G., Jeffres, C., & Miller, M. R. (2016). RAD capture (Rapture): flexible and efficient sequence-based genotyping. *Genetics*, 202(2), 389-400.
- Álvarez-Castro JM, Carlborg O. A unified model for functional and statistical epistasis and its application in quantitative trait loci analysis. *Genetics*. 2007; 176: 1151–1167. doi: 10.1534/genetics.106. 067348
- Anderson JT, LEE C-R, Rushworth CA, et al (2012) Genetic trade-offs and conditional neutrality contribute to local adaptation. *Molecular Ecology* 22:699–708. doi: 10.1111/j.1365-294X.2012.05522.x
- Arnold SJ (1992) Constraints on phenotypic evolution. *The American Naturalist* 140:S85–S107. doi: 10.1086/285398
- Ashander J, Chevin L-M, Baskett ML (2016) Predicting evolutionary rescue via evolving plasticity in stochastic environments. *Proceedings of the Royal Society B: Biological Sciences* 283:20161690–10. doi: 10.1098/rspb.2016.1690
- Ávila V, Pérez-Figueroa A, Caballero A, et al (2014) The action of stabilizing selection, mutation, and drift on epistatic quantitative traits. *Evolution* 68:1974–1987. doi: 10.1111/evo.12413
- Bailey SF, Bataillon T (2016) Can the experimental evolution programme help us elucidate the genetic basis of adaptation in nature? *Molecular Ecology* 25:203–218. doi: 10.1111/mec.13378
- Barrett R, Schluter D (2008) Adaptation from standing genetic variation. *Trends in Ecology & Evolution* 23:38–44. doi: 10.1016/j.tree.2007.09.008
- Barton NH (2017) How does epistasis influence the response to selection? *Heredity* 118:96–109. doi: 10.1038/hdy.2016.109
- Barton NH (1990) Pleiotropic models of quantitative variation. *Genetics* 124:773–782.
- Barton NH (1999) Clines in polygenic traits. *Genetical Research* 74:223–236. doi: 10.1017/S001667239900422X
- Barton NH, Etheridge AM, Véber A (2016) The infinitesimal model. *bioRxiv* 1–54. doi: 10.1101/039768
- Beavis W. 1994. The power and deceit of QTL experiments: lessons from comparative QTL



- 1197 studies. Proceedings of the forty-ninth annual corn and sorghum industry research  
1198 conference. Chicago, IL, USA: American Seed Trade Association, 250–266.
- 1199 Berg JJ, Coop G (2015) A Coalescent Model for a Sweep of a Unique Standing Variant.  
1200 Genetics. doi: 10.1534/genetics.115.178962/-/DC1
- 1201 Berg JJ, Coop G (2014) A Population Genetic Signal of Polygenic Adaptation. PLoS Genetics  
1202 10:e1004412.
- 1203 Berry AJ, Ajioka JW, Kreitman M (1991) Lack of polymorphism on the Drosophila fourth  
1204 chromosome resulting from selection. Genetics 129:1111–1117.
- 1205 Bessega C, Pometti C, Ewens M et al. (2015) Evidences of local adaptation in quantitative traits  
1206 in *Prosopis alba* (Leguminosae). Genetica 143: 31. doi:10.1007/s10709-014-9810-5
- 1207 Blanquart F, Kaltz O, Nuismer SL, Gandon S (2013) A practical guide to measuring local  
1208 adaptation. Ecology Letters 16:1195–1205. doi: 10.1111/ele.12150
- 1209 Boshier D, Broadhurst L, Cornelius J, et al (2015) Is local best? Examining the evidence for  
1210 local adaptation in trees and its scale. Environmental Evidence 4:1–10. doi:  
1211 10.1186/s13750-015-0046-3
- 1212 Bower AD, Aitken SN (2008) Ecological genetics and seed transfer guidelines for *Pinus*  
1213 *albicaulis* (Pinaceae). American Journal of Botany 95:66–76.
- 1214 Boyle EA, Li YI, Pritchard JK (2017) An Expanded View of Complex Traits: From Polygenic to  
1215 Omnigenic. Cell 169:1177–1186. doi: 10.1016/j.cell.2017.05.038
- 1216 Brandvain Y, Wright SI (2016) The Limits of Natural Selection in a Nonequilibrium World.  
1217 Trends in Genetics 32:201–210. doi: 10.1016/j.tig.2016.01.004
- 1218 Breiman, L. (2001). Random Forests. Machine Learning, 45(1), 5–32.  
1219 <http://doi.org/10.1023/A:1010933404324>
- 1220 Budde KB, Heuertz M, Hernandez-Serrano A et al. (2014) In situ genetic association for  
1221 serotiny, a fire-related trait, in Mediterranean maritime pine (*Pinus pinaster*). New  
1222 Phytologist 201:230–241.
- 1223 Bulmer MG (1980) The mathematical theory of quantitative genetics. Genetical research 19: 17-  
1224 25.
- 1225 Bürger R (1999) Evolution of Genetic Variability and the Advantage of Sex and Recombination  
1226 in Changing Environments. Genetics 153:1055–1069.
- 1227 Bürger R, Akerman A (2011) The effects of linkage and gene flow on local adaptation: A two-

- 1228 locus continent-island model. *Theoretical Population Biology* 80:272–288. doi:  
1229 10.1016/j.tpb.2011.07.002
- 1230 Bürger R, Lynch M (1995) Evolution and extinction in a changing environment: a quantitative-  
1231 genetic analysis. *Evolution* 49:151–163. doi: 10.2307/2410301
- 1232 Burghardt LT, Young ND, Tiffin P (2017) A Guide to Genome- Wide Association Mapping in  
1233 Plants. *Current Protocols in Plant Biology*. doi: 10.1002/cppb.20041
- 1234 Buschiazio, E., Ritland, C., Bohlmann, J., & Ritland, K. (2012). Slow but not low: genomic  
1235 comparisons reveal slower evolutionary rate and higher dN/dS in conifers compared to  
1236 angiosperms. *BMC evolutionary biology*, 12(1), 8.
- 1237 Caballero A, Tenesa A, Keightley PD (2015) The nature of genetic variation for complex traits  
1238 revealed by GWAS and regional heritability mapping analyses. *Genetics* 201:1601-1613.
- 1239 Čalić I, Bussotti F, Martínez-García PJ, Neale DB (2015) Recent landscape genomics studies in  
1240 forest trees. *Tree Genetics & Genomes* 1–7. doi: 10.1007/s11295-015-0960-0
- 1241 Carlborg Ö, Haley CS (2004) Epistasis: too often neglected in complex trait studies? *Nature*  
1242 *Reviews Genetics* 5:618–625. doi: 10.1038/nrg1407
- 1243 Carrasco A, Wegrzyn JL, Durán R, et al (2017) Expression profiling in *Pinus radiata* infected  
1244 with *Fusarium circinatum*. *Tree Genetics & Genomes* 13:1665. doi: 10.1007/s11295-017-  
1245 1125-0
- 1246 Carter AJR, Hermisson J, Hansen TF (2005) The role of epistatic gene interactions in the  
1247 response to selection and the evolution of evolvability. *Theoretical Population Biology*  
1248 68:179–196. doi: 10.1016/j.tpb.2005.05.002
- 1249 Catchen JM, Hohenlohe PA, Bernatchez L, et al (2017) Unbroken: RADseq remains a powerful  
1250 tool for understanding the genetics of adaptation in natural populations. *Molecular Ecology*  
1251 *Resources* 17:362–365. doi: 10.1111/1755-0998.12669
- 1252 Charlesworth, B. 2013. Background selection 20 years on: The Wilhelmine E. Key 2012  
1253 Invitational Lecture. *Journal of Heredity* 104: 161-171.
- 1254 Charlesworth B, Charlesworth D (2010) *Elements of Evolutionary Genetics*. Greenwood Village,  
1255 CO: Roberts and Company Publishers. 734 pp.
- 1256 Chaves, J. A., Cooper, E. A., Hendry, A. P., Podos, J., De León, L. F., Raeymaekers, J. A. M., et  
1257 al. (2016). Genomic variation at the tips of the adaptive radiation of Darwin’s finches.  
1258 *Molecular Ecology*, 25(21), 5282–5295. <http://doi.org/10.1111/mec.13743>

- 1259 Cheverud JM, Routman EJ (1995) Epistasis and its contribution to genetic variance components.  
1260 Genetics 139:1455–1461.
- 1261 Chevin L-M (2012) Genetic constraints on adaptation to a changing environment. Evolution  
1262 67:708–721. doi: 10.1111/j.1558-5646.2012.01809.x
- 1263 Chevin L-M, Hoffmann AA (2017) Evolution of phenotypic plasticity in extreme environments.  
1264 Philosophical Transactions of the Royal Society B: Biological Sciences 372:20160138–12.  
1265 doi: 10.1098/rstb.2016.0138
- 1266 Chevin L-M, Lande R, Mace GM (2010a) Adaptation, Plasticity, and Extinction in a Changing  
1267 Environment: Towards a Predictive Theory. PLoS Biol 8:e1000357–8. doi:  
1268 10.1371/journal.pbio.1000357
- 1269 Chevin L-M, Martin G, Lenormand T (2010b) Fisher's model and the genomics of adaptation:  
1270 Restricted pleiotropy, heterogenous mutation, and parallel evolution. Evolution 64:3213–  
1271 3231. doi: 10.1111/j.1558-5646.2010.01058.x
- 1272 Chevin LM, Hospital F (2008) Selective sweep at a quantitative trait locus in the presence of  
1273 background genetic variation. Genetics 180:1645–1660. doi: 10.1534/genetics.108.093351
- 1274 Chevin LM, Lande R (2011) Adaptation to marginal habitats by evolution of increased  
1275 phenotypic plasticity. Journal of Evolutionary Biology 24:1462–1476. doi: 10.1111/j.1420-  
1276 9101.2011.02279.x
- 1277 Cheplick GP (2015) Approaches to Plant Evolutionary Ecology. Oxford University Press, USA.
- 1278 Civelek M, Lusk AJ (2013) Systems genetics approaches to understand complex traits. Nature  
1279 Publishing Group 15:34–48. doi: 10.1038/nrg3575
- 1280 Cockerham CC (1954) An Extension of the Concept of Partitioning Hereditary Variance for  
1281 Analysis of Covariances among Relatives When Epistasis Is Present. Genetics 39:859–882.
- 1282 Cohen D, Borgeat-Triboulot M-B, Tisserant E, et al (2010) Comparative transcriptomics of  
1283 drought responses in Populus: a meta-analysis of genome-wide expression profiling in  
1284 mature leaves and root apices across two genotypes. BMC Genomics 11:630. doi:  
1285 10.1186/1471-2164-11-630
- 1286 Collins S, de Meaux J, Acquisti C (2007) Adaptive walks toward a moving optimum. Genetics  
1287 176:1089–1099. doi: 10.1534/genetics.107.072926
- 1288 Comeault AA, Flaxman SM, Riesch R, et al (2015) Selection on a genetic polymorphism  
1289 counteracts ecological speciation in a stick insect. Current Biology 25:1975–1981. doi:

- 1290 10.1016/j.cub.2015.05.058
- 1291 Comeault AA, Soria-Carrasco V, Gompert Z, et al (2014) Genome-wide association mapping of  
1292 phenotypic traits subject to a range of intensities of natural selection in *Timema cristinae*.  
1293 The American Naturalist 183:711–727. doi: 10.1086/675497
- 1294 Cornelius J (1994) Heritabilities and additive genetic coefficients of variation in forest trees. Can  
1295 J For Res 24:372–379. doi: 10.1139/x94-050
- 1296 Costanza R, d’Arge R, De Groot R, et al (1997) The value of the world’s ecosystem services  
1297 and natural capital. Nature 387:253-260. doi: <http://dx.doi.org/10.1038/387253a0>
- 1298 Cronn R, Dolan PC, Jogdeo S, et al (2017) Transcription Through The Eye Of A Needle: Daily  
1299 And Annual Cycles Of Gene Expression Variation In Douglas-Fir Needles. bioRxiv. doi:  
1300 10.1101/117374
- 1301 Crow JF (2010) On epistasis: why it is unimportant in polygenic directional selection.  
1302 Philosophical Transactions of the Royal Society B: Biological Sciences 365:1241–1244.  
1303 doi: 10.1098/rstb.2009.0275
- 1304 Crow JF (2008) Maintaining evolvability. Journal of genetics 87:349–353. doi: 10.1007/s12041-  
1305 008-0057-8
- 1306 Cruickshank TE, Hahn MW (2014) Reanalysis suggests that genomic islands of speciation are  
1307 due to reduced diversity, not reduced gene flow. Molecular Ecology 23:3133–3157. doi:  
1308 10.1111/mec.12796
- 1309 Csilléry K, Lalagüe H, Vendramin GG, González-Martínez SC, Fady B, Oddou-Muratorio S  
1310 (2014) Detecting short spatial scale local adaptation and epistatic selection in climate-  
1311 related candidate genes in European beech (*Fagus sylvatica*) populations. Molecular  
1312 Ecology 23:4696–4708.
- 1313 De Mita S, Thuillet A-C, Gay L, et al (2013) Detecting selection along environmental gradients:  
1314 analysis of eight methods and their effectiveness for outbreeding and selfing populations.  
1315 Molecular Ecology 22:1383–1399. doi: 10.1111/mec.12182
- 1316 de Villemereuil P, Gaggiotti OE, Mouterde M, Till-Bottraud I (2015) Common garden  
1317 experiments in the genomic era: new perspectives and opportunities. Heredity 116:249–254.  
1318 doi: 10.1038/hdy.2015.93
- 1319 de Visser JAGM, Cooper TF, Elena SF (2011) The causes of epistasis. Proc Biol Sci 278:3617–  
1320 3624. doi: 10.1098/rspb.2011.1537
- 1321 de Vladar HP, Barton N (2014) Stability and response of polygenic traits to stabilizing selection

- 1322 and mutation. Genetics. doi: 10.1534/genetics.113.159111/-/DC1
- 1323 Devlin B, Roeder K (1999) Genomic control for association studies. Biometrics 55:997-1004.
- 1324 Dickson, S. P., Wang, K., Krantz, I., Hakonarson, H., & Goldstein, D. B. (2010). Rare variants  
1325 create synthetic genome-wide associations. *PLoS biology*, 8(1), e1000294.
- 1326 Dittmar EL, Oakley CG, Conner JK, et al (2016) Factors influencing the effect size distribution  
1327 of adaptive substitutions. Proc Biol Sci 283:20153065–8. doi: 10.1098/rspb.2015.3065
- 1328 Donohue K, Rubio de Casas R, Burghardt L, Kovach K, Willis CG (2010) Germination, post-  
1329 germination adaptation, and species ecological ranges. Annual Review of Ecology  
1330 Evolution and Systematics 41:293–319.
- 1331 Du, J., & Groover, A. (2010, January). Transcriptional regulation of secondary growth and wood  
1332 formation. Journal of Integrative Plant Biology.
- 1333 East EM (1910) A Mendelian interpretation of variation that is apparently continuous. The  
1334 American Naturalist 44:65–82.
- 1335 Eckert AJ, Bower AD, Jermstad KD, et al (2013a) Multilocus analyses reveal little evidence for  
1336 lineage-wide adaptive evolution within major clades of soft pines (*Pinus* subgenus *Strobus*).  
1337 Molecular Ecology 22:5635–5650. doi: 10.1111/mec.12514
- 1338 Eckert AJ, Maloney PE, Vogler DR, et al (2015) Local adaptation at fine spatial scales: an  
1339 example from sugar pine (*Pinus lambertiana*, *Pinaceae*). Tree Genetics & Genomes 11:1-  
1340 17.
- 1341 Eckert AJ, Wegryzn JL, Liechty JD, et al (2013b) The Evolutionary Genetics of the Genes  
1342 Underlying Phenotypic Associations for Loblolly Pine (*Pinus taeda*, *Pinaceae*). Genetics  
1343 195:1353–1372. doi: 10.1534/genetics.113.157198/-/DC1
- 1344 Ehret GB, Lamparter D, Hoggart CJ, Whittaker JC, Beckmann JS, Kutalik Z, Genetic  
1345 Investigation of Anthropometric Traits Consortium (2012) A multi-SNP locus-association  
1346 method reveals a substantial fraction of the missing heritability. The American Journal of  
1347 Human Genetics, 91, 863–871.
- 1348 Eyre-Walker A, Keightley PD (2007) The distribution of fitness effects of new mutations. Nature  
1349 Reviews Genetics 8:610–618. doi: 10.1038/nrg2146
- 1350 Evans, L. M., Kaluthota, S., Pearce, D. W., Allan, G. J., Floate, K., Rood, S. B., & Whitham, T.  
1351 G. (2016). Bud phenology and growth are subject to divergent selection across a latitudinal  
1352 gradient in *Populus angustifolia* and impact adaptation across the distributional range and  
1353 associated arthropods. Ecology and evolution 6:4565-4581. doi: 10.1002/ece3.2222

- 1354 Falconer DS (1989) Introduction to quantitative genetics, 3d ed. Longman, New York.
- 1355 Feder JL, Egan SP, Nosil P (2012a) The genomics of speciation-with- gene-flow. Trends in  
1356 Genetics 28:342–350. doi: 10.1016/j.tig.2012.03.009
- 1357 Feder JL, Gejji R, Yeaman S, Nosil P (2012b) Establishment of new mutations under divergence  
1358 and genome hitchhiking. Philosophical Transactions of the Royal Society B: Biological  
1359 Sciences 367:461–474. doi: 10.1038/nature08480
- 1360 Feder JL, Nosil P (2010) The efficacy of divergence hitchhiking in generating genomic islands  
1361 during ecological speciation. Evolution 64:1729–1747. doi: 10.1111/j.1558-  
1362 5646.2009.00943.x
- 1363 Feldman M, Lewontin R (1975) The heritability hang-up. Science 190:1163–1168. doi:  
1364 10.1126/science.1198102
- 1365 Fisher RA (1918) The correlation between relatives on the supposition of Mendelian inheritance.  
1366 Transactions of the Royal Society of Edinburgh 52:399–433.
- 1367 Fisher RA (1930) The genetical theory of natural selection: a complete variorum edition. Oxford  
1368 University Press
- 1369 Forester BR, Lasky JR, Wagner HH, Urban DL (2017) Using genotype-environment associations  
1370 to identify multilocus local adaptation. bioRxiv 1–24. doi: 10.1101/129460
- 1371 Franks SJ, Weber JJ, Aitken SN (2013) Evolutionary and plastic responses to climate change in  
1372 terrestrial plant populations. Evolutionary Applications 7:123–139. doi: 10.1111/eva.12112
- 1373 Gagnaire P-A, Gaggiotti OE (2016) Detecting polygenic selection in marine populations by  
1374 combining population genomics and quantitative genetics approaches. Curr Zool 62:603–  
1375 616. doi: 10.1093/cz/zow088
- 1376 Gazal S, Finucane HK, Furlotte NA, Loh P, Palamara PF, Liu X, Schoech A, Bulik-Sullivan B,  
1377 Neale BM, Gusev A, Price A (2017) Linkage disequilibrium–dependent architecture of  
1378 human complex traits shows action of negative selection. Nat. Gen. 1-7. doi:  
1379 10.1038/ng.3954
- 1380 Gibson G (2012) Rare and common variants: twenty arguments. Nature Reviews Genetics  
1381 13:135–145. doi: 10.1038/nrg3118
- 1382 Gilbert, K. J., & Whitlock, M. C. (2015).  $Q_{ST}$ – $F_{ST}$  comparisons with unbalanced half- sib  
1383 designs. Molecular ecology resources 15:262-267.
- 1384 Goddard ME, Wray NR, Verbyla K, Visscher PM (2009) Estimating effects and making



- 1385 predictions from genome-wide marker data. *Statistical Science* 24:517-529.
- 1386 Goldstein DB, Holsinger KE (1992) Maintenance of polygenic variation in spatially structured  
1387 populations: roles for local mating and genetic redundancy. *Evolution* 46:412–429. doi:  
1388 10.2307/2409861
- 1389 Gompert, Z., Egan, S. P., Barrett, R. D. H., Feder, J. L., & Nosil, P. (2016). Multilocus  
1390 approaches for the measurement of selection on correlated genetic loci. *Molecular Ecology*,  
1391 1–18. <http://doi.org/10.1111/mec.13867>
- 1392 Gompert, Z., Jahner, J. P., Scholl, C. F., Wilson, J. S., Lucas, L. K., Soria-Carrasco, V., et al.  
1393 (2015). The evolution of novel host use is unlikely to be constrained by trade-offs or a lack  
1394 of genetic variation. *Molecular Ecology*, 24(11), 2777–2793.  
1395 <http://doi.org/10.1111/mec.13199>
- 1396 Goodnight CJ (1988) Epistasis and the effect of founder events on the additive genetic variance.  
1397 *Evolution* 42:441-454. doi: 10.2307/2409030
- 1398 Göring HHH, Terwilliger JD, Blangero J (2001) Large Upward Bias in Estimation of Locus-  
1399 Specific Effects from Genomewide Scans. *The American Journal of Human Genetics*  
1400 69:1357–1369. doi: 10.1086/324471
- 1401 Griswold CK (2015) Additive genetic variation and evolvability of a multivariate trait can be  
1402 increased by epistatic gene action. *J Theor Biol* 387:241–257. doi:  
1403 10.1016/j.jtbi.2015.09.023
- 1404 Guan, Y., & Stephens, M. (2011). Bayesian variable selection regression for genome-wide  
1405 association studies and other large-scale problems. *Annals of Eugenics*, 5(3), 1780–1815.  
1406 <http://doi.org/10.1214/11-AOAS455>
- 1407 Haldane JBS (1930) A mathematical theory of natural and artificial selection.(Part VI,  
1408 Isolation.). 26:220–230.
- 1409 Hall D, Hallingbäck HR, Wu HX (2016) Estimation of number and size of QTL effects in forest  
1410 tree traits. *Tree Genetics & Genomes* 1–17. doi: 10.1007/s11295-016-1073-0
- 1411 Hancock AM, Alkorta-Aranburu G, Witonsky DB, Di Rienzo A (2010) Adaptations to new  
1412 environments in humans: the role of subtle allele frequency shifts. *Philosophical*  
1413 *Transactions of the Royal Society B: Biological Sciences* 365:2459–2468. doi:  
1414 10.1098/rstb.2010.0032
- 1415 Hansen TF (2006) The Evolution of Genetic Architecture. *Annual Review of Ecology*,  
1416 *Evolution, and Systematics* 37:123–157. doi: 10.1146/annurev.ecolsys.37.091305.110224

- 1417 Hansen TF, Pelabon C, Houle D (2011) Heritability is not evolvability. *Evolutionary Biology*  
1418 38:258-277
- 1419 Hansen TF (2013) Why epistasis is important for selection and adaptation. *Evolution* 67:3501–  
1420 3511. doi: 10.1111/evo.12214
- 1421 Hansen TF (2003) Is modularity necessary for evolvability? *Biosystems* 69:83–94. doi:  
1422 10.1016/S0303-2647(02)00132-6
- 1423 Hansen TF, Wagner GP (2001) Modeling genetic architecture: a multilinear theory of gene  
1424 interaction. *Theoretical Population Biology* 59:61–86. doi: 10.1006/tpbi.2000.1508
- 1425 Hemani G, Knott S, Haley C (2013) An Evolutionary Perspective on Epistasis and the Missing  
1426 Heritability. *PLoS Genetics* 9:e1003295. doi: 10.1371/journal.pgen.1003295
- 1427 Henderson CR (1975) Best linear unbiased estimation and prediction under a selection model.  
1428 *Biometrics* 31:423-447.
- 1429 Hendry AP (2002)  $QST > = < FST$ ? *Trends in Ecology & Evolution* 17:502-502. doi:  
1430 [http://dx.doi.org/10.1016/S0169-5347\(02\)02603-4](http://dx.doi.org/10.1016/S0169-5347(02)02603-4)
- 1431 Hendry AP (2016) Key Questions on the Role of Phenotypic Plasticity in Eco-Evolutionary  
1432 Dynamics. *Journal of Heredity* 107:25–41. doi: 10.1093/jhered/esv060
- 1433 Hereford J (2009) A Quantitative Survey of Local Adaptation and Fitness Trade- Offs. *The*  
1434 *American Naturalist* 173:579–588. doi: 10.1086/597611
- 1435 Hermisson J (2009) Who believes in whole-genome scans for selection? *Heredity* 103:283–284.  
1436 doi: 10.1038/hdy.2009.101
- 1437 Hermisson J, Hansen TF, Wagner GP (2003) Epistasis in Polygenic Traits and the Evolution of  
1438 Genetic Architecture under Stabilizing Selection. *American Naturalist* 161:708–734. doi:  
1439 10.1086/374204
- 1440 Hermisson J, Pennings PS (2005) Soft sweeps: molecular population genetics of adaptation from  
1441 standing genetic variation. *Genetics* 169:2335–2352. doi: 10.1534/genetics.104.036947
- 1442 Hermisson J, Pennings PS (2017) Soft sweeps and beyond: understanding the patterns and  
1443 probabilities of selection footprints under rapid adaptation. *Methods in Ecology and*  
1444 *Evolution* 8:700–716. doi: 10.1111/2041-210X.12808
- 1445 Hill WG (2010) Understanding and using quantitative genetic variation. *Philosophical*  
1446 *Transactions of the Royal Society B* 365:73-85.
- 1447 Hill WG, Goddard ME, Visscher PM (2008) Data and Theory Point to Mainly Additive Genetic



- 1448 Variance for Complex Traits. PLoS Genetics 4:e1000008–10. doi:  
1449 10.1371/journal.pgen.1000008
- 1450 Hirschhorn JN, Daly MJ (2005) Genome-wide association studies for common diseases and  
1451 complex traits. Nature Reviews Genetics 6:95-108.
- 1452 Hoban S, Kelley JL, Lotterhos KE, et al (2016) Finding the Genomic Basis of Local Adaptation:  
1453 Pitfalls, Practical Solutions, and Future Directions. The American Naturalist 188:000–000.  
1454 doi: 10.1086/688018
- 1455 Hodgins KA, Yeaman S, Nurkowski KA, et al (2016) Expression Divergence Is Correlated with  
1456 Sequence Evolution but Not Positive Selection in Conifers. Molecular Biology and  
1457 Evolution 33:1502–1516. doi: 10.1093/molbev/msw032
- 1458 Holliday JA, Aitken SN, Cooke JEK et al. (2017) Advances in ecological genomics in forest  
1459 trees and applications to genetic resources conservation and breeding. Molecular Ecology  
1460 26:706–717.
- 1461 Holliday, J. A., Wang, T., & Aitken, S. N. (2012). Predicting adaptive phenotypes from  
1462 multilocus genotypes in Sitka spruce (*Picea sitchensis*) using random forest. G3: Genes,  
1463 Genomes, Genetics. <http://doi.org/10.1534/g3.112.002733/-/DC1>
- 1464 Holliday JA, Zhou L, Bawa R, et al (2016) Evidence for extensive parallelism but divergent  
1465 genomic architecture of adaptation along altitudinal and latitudinal gradients in *Populus*  
1466 *trichocarpa*. New Phytologist 209:1240-1251.
- 1467 Hoffmann AA, Rieseberg LH (2008) Revisiting the Impact of Inversions in Evolution: From  
1468 Population Genetic Markers to Drivers of Adaptive Shifts and Speciation? Annual Review  
1469 of Ecology, Evolution, and Systematics 39:21–42. doi:  
1470 10.1146/annurev.ecolsys.39.110707.173532
- 1471 Hornoy, B., Pavy, N., Gérardi, S., Beaulieu, J., & Bousquet, J. (2015). Genetic Adaptation to  
1472 Climate in White Spruce Involves Small to Moderate Allele Frequency Shifts in  
1473 Functionally Diverse Genes. Genome Biology and Evolution, 7(12), 3269–3285.  
1474 <http://doi.org/10.1093/gbe/evv218>
- 1475 Huang W, Mackay TFC (2016) The Genetic Architecture of Quantitative Traits Cannot Be  
1476 Inferred from Variance Component Analysis. PLoS Genetics 12:e1006421–15. doi:  
1477 10.1371/journal.pgen.1006421
- 1478 Huber, C. D., Durvasula, A., Hancock, A. M., & Lohmueller, K. E. (2017). Gene expression  
1479 drives the evolution of dominance. bioRxiv, 182865. doi: <http://dx.doi.org/10.1101/182865>
- 1480 Innan H, Kim Y (2004) Pattern of polymorphism after strong artificial selection in a

- 1481 domestication event. Proceedings of the National Academy of Sciences 101:10667–10672.  
1482 doi: 10.1073/pnas.0401720101
- 1483 Jain K, Stephan W (2015) Response of polygenic traits under stabilizing selection and mutation  
1484 when loci have unequal effects. G3: Genes | Genomes | Genetics 5:1065–1074. doi:  
1485 10.1534/g3.115.017970
- 1486 Jain K, Stephan W (2017) Rapid Adaptation of a Polygenic Trait After a Sudden Environmental  
1487 Shift. Genetics 206:389–406. doi: 10.1534/genetics.116.196972
- 1488 Jansen RC, Tesson BM, Fu J, et al (2009) Defining gene and QTL networks. Current Opinion in  
1489 Plant Biology 12:241–246. doi: 10.1016/j.pbi.2009.01.003
- 1490 Jensen JD (2014) On the unfounded enthusiasm for soft selective sweeps. Nature  
1491 Communications 5:5281. doi: 10.1038/ncomms6281
- 1492 Jensen JD, Kim Y, DuMont VB, et al (2005) Distinguishing between selective sweeps and  
1493 demography using DNA polymorphism data. Genetics 170:1401–1410. doi:  
1494 10.1534/genetics.104.038224
- 1495 John Maynard Smith JH (1974) The hitch-hiking effect of a favourable gene. Genetical Research  
1496 23:23–35.
- 1497 Johnson RC, Nelson GW, Troyer JL, et al (2010) Accounting for multiple comparisons in a  
1498 genome-wide association study (GWAS). BMC Genomics 11:724.
- 1499 Jones AG, Bürger R, Arnold SJ (2014) Epistasis and natural selection shape the mutational  
1500 architecture of complex traits. Nature Communications 5:1–10. doi: 10.1038/ncomms4709
- 1501 Joo JWJ, Hormozdiari F, Han B, Eskin E (2016) Multiple testing correction in linear mixed  
1502 models. Genome Biology 17:62.
- 1503 Joron M, Frezal L, Jones RT, et al (2011) Chromosomal rearrangements maintain a polymorphic  
1504 supergene controlling butterfly mimicry. Nature 477:203–206. doi: 10.1038/nature10341
- 1505 Josephs EB, Wright SI, et al (2017a) The Relationship between Selection, Network Connectivity,  
1506 and Regulatory Variation within a Population of *Capsella grandiflora*. Genome Biology and  
1507 Evolution 9:1099–1109. doi: 10.1093/gbe/evx068
- 1508 Josephs EB, Lee YW, Stinchcombe JR, Wright SI (2015) Association mapping reveals the role  
1509 of purifying selection in the maintenance of genomic variation in gene expression.  
1510 Proceedings of the National Academy of Sciences 112:15390–15395. doi:  
1511 10.1073/pnas.1503027112

- 1512 Josephs EB, Stinchcombe JR, Wright SI (2017b) What can genome-wide association studies tell  
1513 us about the evolutionary forces maintaining genetic variation for quantitative traits? *New*  
1514 *Phytologist* 214:21–33. doi: 10.1111/nph.14410
- 1515 Kaplan NL, Hudson RR, Langley CH (1989) The “hitchhiking effect” revisited. *Genetics*  
1516 123:887–899.
- 1517 Kawecki TJ (2008) Adaptation to Marginal Habitats. *Annual Review of Ecology, Evolution, and*  
1518 *Systematics* 39:321–342. doi: 10.1146/annurev.ecolsys.38.091206.095622
- 1519 Kawecki TJ, Ebert D (2004) Conceptual issues in local adaptation. *Ecology Letters* 7:1225–  
1520 1241. doi: 10.1111/j.1461-0248.2004.00684.x
- 1521 Keightley PD, Eyre-Walker A (2010) What can we learn about the distribution of fitness effects  
1522 of new mutations from DNA sequence data? *Philos Trans R Soc Lond, B, Biol Sci*  
1523 365:1187–1193. doi: 10.1098/rstb.2009.0266
- 1524 Kempthorne O (1954) The Correlation between Relatives in a Random Mating Population.  
1525 *Proceedings of the Royal Society B: Biological Sciences* 143:103–113. doi:  
1526 10.1098/rspb.1954.0056
- 1527 Kimura M (1983) *The neutral theory of molecular evolution*. Cambridge University Press
- 1528 Kirkpatrick M, Barton NH (1997) Evolution of a species' range. *The American Naturalist* 150:1–  
1529 23. doi: 10.1086/286054
- 1530 Kirkpatrick M, Barton NH (2006) Chromosome Inversions, Local Adaptation and Speciation.  
1531 *Genetics* 173:419–434. doi: 10.1534/genetics.105.047985
- 1532 Kopp M, Hermisson J (2009a) The Genetic Basis of Phenotypic Adaptation I: Fixation of  
1533 Beneficial Mutations in the Moving Optimum Model. *Genetics* 182:233–249. doi:  
1534 10.1534/genetics.108.099820
- 1535 Kopp M, Hermisson J (2009b) The genetic basis of phenotypic adaptation II: the distribution of  
1536 adaptive substitutions in the moving optimum model. *Genetics* 183:1453–1476. doi:  
1537 10.1534/genetics.109.106195
- 1538 Kopp M, Matuszewski S (2013) Rapid evolution of quantitative traits: theoretical perspectives.  
1539 *Evolutionary Applications* 7:169–191. doi: 10.1111/eva.12127
- 1540 Kremer A, Le Corre V (2012) Decoupling of differentiation between traits and their underlying  
1541 genes in response to divergent selection. *Heredity* 108:375–385. doi: 10.1038/hdy.2011.81
- 1542 Kremer A, Ronce O, Robledo-Arnuncio JJ, et al (2012). Long-distance gene flow and adaptation

- 1543 of forest trees to rapid climate change. *Ecology Letters* 15:378-392.
- 1544 Krutovsky KV, Neale DB (2005) Nucleotide diversity and linkage disequilibrium in cold-  
1545 hardiness- and wood quality-related candidate genes in Douglas fir. *Genetics* 171:2029–  
1546 2041. doi: 10.1534/genetics.105.044420
- 1547 Lamichhaney S, Berglund J, Almén MS, et al (2015) Evolution of Darwin’s finches and their  
1548 beaks revealed by genome sequencing. *Nature* 518:371–375. doi: 10.1038/nature14181
- 1549 Lamy JB, Bouffier L, Burlett R, Plomion C, Cochard H, Delzon S (2011) Uniform selection as a  
1550 primary force reducing population genetic differentiation of cavitation resistance across a  
1551 species range. *PLoS One* 6:e23476.
- 1552 Lande R (1980) The genetic covariance between characters maintained by pleiotropic mutations.  
1553 *Genetics* 94:203–215.
- 1554 Lande R (2009) Adaptation to an extraordinary environment by evolution of phenotypic  
1555 plasticity and genetic assimilation. *Journal of Evolutionary Biology* 22:1435–1446. doi:  
1556 10.1111/j.1420-9101.2009.01754.x
- 1557 Lande R, Arnold S (1983) The measurement of selection on correlated characters. *Evolution*, 37,  
1558 1210–1226. doi: 10.1111/j.1558-5646.1983.tb00236.x
- 1559 Langlet O (1971) Two hundred years genecology. *Taxon* 20:653–721. doi: 10.2307/1218596
- 1560 Latta RG (1998) Differentiation of allelic frequencies at quantitative trait loci affecting locally  
1561 adaptive traits. *The American Naturalist* 151:283–292. doi: 10.1086/286119
- 1562 Latta RG (2003) Gene flow, adaptive population divergence and comparative population  
1563 structure across loci. *New Phytologist* 161:51–58. doi: 10.1046/j.1469-8137.2003.00920.x
- 1564 Laurent S, Pfeifer SP, Settles ML, et al (2016) The population genomics of rapid adaptation:  
1565 disentangling signatures of selection and demography in white sands lizards. *Molecular*  
1566 *Ecology* 25:306–323. doi: 10.1111/mec.13385
- 1567 Lauteri M, Pliura A, Monteverdi MC, Brugnoli E, Villani F, Eriksson G (2004) Genetic variation  
1568 in carbon isotope discrimination in six European populations of *Castanea sativa* Mill.  
1569 originating from contrasting localities. *Journal of evolutionary biology* 17:1286-1296.
- 1570 Le Corre V, Kremer A (2012) The genetic differentiation at quantitative trait loci under local  
1571 adaptation. *Molecular Ecology* 21:1548–1566. doi: 10.1111/j.1365-294X.2012.05479.x
- 1572 Le Rouzic A, Álvarez-Castro JM (2016) Epistasis-induced evolutionary plateaus in selection  
1573 responses. *American Naturalist* 188:E134–E150. doi: 10.1086/688893

- 1574 Leimu R, Fischer M (2008) A meta-analysis of local adaptation in plants. PLoS ONE 3:e4010.  
1575 doi: 10.1371/journal.pone.0004010.s001
- 1576 Leinonen T, McCairns RJS, O'Hara RB, Merilä J (2013) QST–FST comparisons: evolutionary  
1577 and ecological insights from genomic heterogeneity. Nature Reviews Genetics 14:179–190.  
1578 doi: 10.1038/nrg3395
- 1579 Leinonen PH, Sandring S, Quilot B, et al (2009). Local adaptation in european populations of  
1580 *Arabidopsis lyrata* (Brassicaceae). American Journal of Botany 96:1129–1137.
- 1581 Leiserson M, Eldridge JV, Ramachandran S (2013) Network analysis of GWAS data. Current  
1582 opinion in Genetics and Development 23:602-610 doi: 10.1016/j.gde.2013.09.003
- 1583 Lenormand T (2002) Gene flow and the limits to natural selection. Trends in Ecology &  
1584 Evolution 17:183–189. doi: 10.1016/S0169-5347(02)02497-7
- 1585 Lewontin RC, Krakauer J (1973) Distribution of gene frequency as a test of the theory of the  
1586 selective neutrality of polymorphisms.
- 1587 Li Y, Suontoma M, Burdon RD, Dungey HS (2017) Genotype by environment interactions in  
1588 forest tree breeding: review of methodology and perspectives on research and application.  
1589 Tree Genetics & Genomes 13:60. doi: 10.1007/s11295-017-1144-x
- 1590 Lind BM, Friedline CJ, Wegrzyn JL, et al (2017) Water availability drives signatures of local  
1591 adaptation in whitebark pine (*Pinus albicaulis* Engelm.) across fine spatial scales of the  
1592 Lake Tahoe Basin, USA. Molecular Ecology 26:3168–3185 doi: 10.1111/mec.14106
- 1593 Loehle C (1988) Tree life history strategies: the role of defenses. Canadian Journal of Forest  
1594 Research 18: 209-222.
- 1595 Long AD, Langley CH (1999) The power of association studies to detect the contribution of  
1596 candidate genetic loci to variation in complex traits. Genome Research 9:720-731.
- 1597 Lopez GA, Potts BM, Vaillancourt RE, Apiolaza LA (2003). Maternal and carryover effects on  
1598 early growth of Eucalyptus globulus. Canadian Journal of Forest Research, 33(11), 2108–  
1599 2115. <http://doi.org/10.1139/X03-132>
- 1600 Liu J-J (2017) Profiling methyl jasmonate-responsive transcriptome for understanding induced  
1601 systemic resistance in whitebark pine (*Pinus albicaulis*). Plant Mol Biol 0:0–0. doi:  
1602 10.1007/s11103-017-0655-z&domain=pdf
- 1603 Liu J-J, Schoettle AW, Sniezko RA, et al (2016) Genetic mapping of *Pinus flexilis* major gene  
1604 (Cr4) for resistance to white pine blister rust using transcriptome-based SNP genotyping.  
1605 BMC Genomics 17:1–12. doi: 10.1186/s12864-016-3079-2

- 1606 Lotterhos KE, Whitlock MC (2015) The relative power of genome scans to detect local  
1607 adaptation depends on sampling design and statistical method. *Molecular Ecology* 24:1031–  
1608 1046.
- 1609 Lotterhos KE, Whitlock MC (2014) Evaluation of demographic history and neutral  
1610 parameterization on the performance of  $F_{ST}$  outlier tests. *Molecular Ecology* 23:2178–2192.  
1611 doi: 10.1111/mec.12725
- 1612 Lowry DB, Hoban S, Kelley JL, et al (2016) Breaking RAD: an evaluation of the utility of  
1613 restriction site-associated DNA sequencing for genome scans of adaptation. *Molecular*  
1614 *Ecology Resources* 17:142–152. doi: 10.1111/1755-0998.12635
- 1615 Lowry DB, Hoban S, Kelley JL, et al (2017) Responsible RAD: Striving for best practices in  
1616 population genomic studies of adaptation. *Molecular Ecology Resources* 17:366–369. doi:  
1617 10.1111/1755-0998.12677
- 1618 Luo M-C, You FM, Li P, et al (2015) Synteny analysis in Rosids with a walnut physical map  
1619 reveals slow genome evolution in long-lived woody perennials. *BMC Genomics* 1–17. doi:  
1620 10.1186/s12864-015-1906-5
- 1621 Lynch M, Walsh B (1998) Genetics and analysis of quantitative traits. Sinauer Sunderland, MA
- 1622 Mackay T (2001) The genetic architecture of quantitative traits. *Annual review of genetics*, **35**,  
1623 303–339.
- 1624 Mackay TFC (2014) Epistasis and quantitative traits: using model organisms to study gene-gene  
1625 interactions. *Nature Reviews Genetics* 15:22–33. doi: 10.1038/nrg3627
- 1626 Mackay TFC, Stone EA, Ayroles JF (2009) The genetics of quantitative traits: challenges and  
1627 prospects. *Nature Reviews Genetics* 10:565–577. doi: 10.1038/nrg2612
- 1628 MacPherson A, Hohenlohe PA, Nuismer SL (2015) Trait dimensionality explains widespread  
1629 variation in local adaptation. *Proc Biol Sci* 282:20141570–20141570. doi:  
1630 10.1098/rspb.2014.1570
- 1631 Mahalovich MF, Hipkins VD (2011) Molecular genetic variation in whitebark pine (*Pinus*  
1632 *albicaulis* Engelm.) in the Inland West. In: Keane, Robert E.; Tomback, Diana F.; Murray,  
1633 Michael P.; and Smith, Cyndi M., eds. 2011. The future of high-elevation, five-needle white  
1634 pines in Western North America: Proceedings of the High Five Symposium. 28-30 June  
1635 2010; Missoula, MT. Proceedings RMRS-P-63. Fort Collins, CO: U.S. Department of  
1636 Agriculture, Forest Service, Rocky Mountain Research Station. 376 p.
- 1637 Mähler N, Wang J, Terebieniec BK, et al (2017) Gene co-expression network connectivity is an  
1638 important determinant of selective constraint. *PLoS Genetics* 13:e1006402–33. doi:



- 1639 10.1371/journal.pgen.1006402
- 1640 Mahler DL, Weber MG, Wagner CE, Ingram T (2017) Pattern and Process in the Comparative  
1641 Study of Convergent Evolution. *American Naturalist* 190:S13–S28. doi: 10.1086/692648
- 1642 Mäki-Tanila A, Hill WG (2014) Influence of gene interaction on complex trait variation with  
1643 multilocus models. *Genetics* 198:355–367. doi: 10.1534/genetics.114.165282
- 1644 Martin G, Lenormand T (2006) A general multivariate extension of Fisher's geometrical model  
1645 and the distribution of mutation fitness effects across species. *Evolution* 60:893–16. doi:  
1646 10.1554/05-412.1
- 1647 Martin G, Lenormand T (2008) The distribution of beneficial and fixed mutation fitness effects  
1648 close to an optimum. *Genetics* 179:907–916. doi: 10.1534/genetics.108.087122
- 1649 Matuszewski S, Hermisson J, Kopp M (2015) Catch me if you can: Adaptation from standing  
1650 genetic variation to a moving phenotypic optimum. *Genetics* 200:1255–1274. doi:  
1651 10.1534/genetics.115.178574/-/DC1
- 1652 Matuszewski S, Hermisson J, Kopp M (2014) Fisher's Geometric Model with a moving  
1653 optimum. *Evolution* 68:2571–2588. doi: 10.1111/evo.12465
- 1654 Mátyás C (1996) Climatic adaptation of trees: rediscovering provenance tests. *Euphytica* 92:45–  
1655 54.
- 1656 McCandlish DM, Stoltzfus A (2014) Modeling evolution using the probability of fixation:  
1657 history and implications. *The Quarterly review of biology* 89:225–252. doi: 10.1086/677571
- 1658 McKay JK, Latta RG (2002) Adaptive population divergence: markers, QTL and traits. *Trends in*  
1659 *Ecology & Evolution* 17:285–291.
- 1660 McKinney GJ, Larson WA, Seeb LW, Seeb JE (2017) RADseq provides unprecedented insights  
1661 into molecular ecology and evolutionary genetics: comment on Breaking RAD by Lowry et  
1662 al. (2016). *Molecular Ecology Resources* 17:356–361. doi: 10.1111/1755-0998.12649
- 1663 Meier JJ, Sousa VC, Marques DA, et al (2016) Demographic modelling with whole-genome data  
1664 reveals parallel origin of similar *Pundamilia* cichlid species after hybridization. *Molecular*  
1665 *Ecology* 26:123–141. doi: 10.1111/mec.13838
- 1666 Messer PW, Petrov DA (2013) Population genomics of rapid adaptation by soft selective sweeps.  
1667 *Trends in Ecology & Evolution* 28:659–669. doi: 10.1016/j.tree.2013.08.003
- 1668 Mitton JB, Stutz HP, Schuster WS (1989) Genotypic differentiation at PGM in Engelmann  
1669 spruce from wet and dry sites. *Silvae Genetica* 38:217–221.

- 1670 Mitton JB, Grant MC, Yoshino AM (1998) Variation in allozymes and stomatal size in pinyon  
1671 (*Pinus edulis*, Pinaceae), associated with soil moisture. American Journal of Botany  
1672 85:1262–1265.
- 1673 Mitton JB, Williams CG (2006) Gene Flow in Conifers. In: Landscapes, Genomics, and  
1674 Transgenic Conifers. (ed Williams CG), pp. 147–168. Springer Netherlands, Dordrecht.
- 1675 Mizrachi E, Verbeke L, Christie N, et al (2017) Network-based integration of systems genetics  
1676 data reveals pathways associated with lignocellulosic biomass accumulation and processing.  
1677 Proc Natl Acad Sci 114:1195–1200. doi: 10.1073/pnas.1620119114
- 1678 Moreno G (1994) Genetic architecture, genetic behavior, and character evolution. Annual review  
1679 of ecology and systematics 25:31–44.
- 1680 Morgenstern EK (1996) Geographic variation in forest trees: genetic basis and application of  
1681 knowledge in silviculture. UBC press.
- 1682 Morse AM, Peterson DG, Islam-Faridi MN, et al (2009) Evolution of genome size and  
1683 complexity in *Pinus*. PLoS ONE 4:e4332.
- 1684 Moser G, Lee SH, Hayes BJ, Goddard ME, Wray NR, Visscher PM (2015) Simultaneous  
1685 discovery, estimation and prediction analysis of complex traits using a Bayesian mixture  
1686 model. PLoS Genetics, 11, e1004969.
- 1687 Namkoong G (1979) Introduction to Quantitative Genetics in Forestry. Technical Bulletin No.  
1688 1588. Washington, D. C. USDA Forest Service. 342 pp.
- 1689 Neale DB, Kremer A. (2011). Forest tree genomics: growing resources and applications. Nature  
1690 Reviews Genetics 12:111–122.
- 1691 Neale DB, Langley CH, Salzberg SL, Wegrzyn JL (2013) Open access to tree genomes: the path  
1692 to a better forest. Genome Biology 14:6 14:120. doi: 10.1186/gb-2013-14-6-120
- 1693 Neale DB, Martínez-García PJ, La Torre De AR, et al (2017) Novel Insights into Tree Biology  
1694 and Genome Evolution as Revealed Through Genomics. Ann Rev of Plant Biol 68:457–483.  
1695 doi:10.1146/annurev-arplant-042916-041049
- 1696 Neale DB, Savolainen O (2004) Association genetics of complex traits in conifers. Trends in  
1697 Plant Science 9:325–330.
- 1698 Nelson RM, Pettersson ME, Carlborg Ö (2013) A century after Fisher: time for a new paradigm  
1699 in quantitative genetics. Trends in Genetics 29:669–676. doi: 10.1016/j.tig.2013.09.006
- 1700 Nilsson-Ehle H (1909) Kreuzungsuntersuchungen an Hafer und Weizen. Lunds Universitets  
1701 Arsskrift 5:1–122.



- 1702 Nystedt B, Street NR, Wetterbom A, et al. (2013) The Norway spruce genome sequence and  
1703 conifer genome evolution. *Nature* 497:570-584.
- 1704 Ohta T (1982) Linkage disequilibrium with the island model. *Genetics* 101:139–155.
- 1705 Ohta, T. 1992. The nearly neutral theory of molecular evolution. *Annu. Rev. Ecol. Syst.* 23:263-  
1706 286.
- 1707 Ohta, T. 1996. The current significance and standing of neutral and nearly neutral theories.  
1708 *BioEssays* 18: 673-684.
- 1709 Orr HA (1998) The population genetics of adaptation: the distribution of factors fixed during  
1710 adaptive evolution. *Evolution* 52:935. doi: 10.2307/2411226
- 1711 Orr HA (2005) The genetic theory of adaptation: a brief history. *Nature Reviews Genetics*  
1712 6:119–127. doi: 10.1038/nrg1523
- 1713 Orr HA (2003) The Distribution of Fitness Effects Among Beneficial Mutations. *Genetics*  
1714 163:1519–1526. doi: 10.1101/SQB.1951.016.01.026
- 1715 Orr HA (2006) The distribution of fitness effects among beneficial mutations in Fisher's  
1716 geometric model of adaptation. *J Theor Biol* 238:279–285. doi: 10.1016/j.jtbi.2005.05.001
- 1717 Orr HA (2001) The “sizes” of mutations fixed in phenotypic evolution: a response to Clarke and  
1718 Arthur. *Evolution & Development* 3:121–123. doi: 10.1046/j.1525-142x.2001.003003121.x
- 1719 Orr HA (2000) Adaptation and the cost of complexity. *Evolution* 54:13–20. doi: 10.1111/j.0014-  
1720 3820.2000.tb00002.x
- 1721 Ortiz-Barrientos D, Engelstädter J, Rieseberg LH (2016) Recombination Rate Evolution and the  
1722 Origin of Species. *Trends in Ecology & Evolution* 31:226–236. doi:  
1723 10.1016/j.tree.2015.12.016
- 1724 Ovaskainen O, Karhunen M, Zheng CH, Cano Arias JM, Merilä J (2011) A new method to  
1725 uncover signatures of divergent and stabilizing selection in quantitative traits. *Genetics*  
1726 189:621–632.
- 1727 Paaby AB, Rockman MV (2013) The many faces of pleiotropy. *Trends in Genetics* 29:66–73.  
1728 doi: 10.1016/j.tig.2012.10.010
- 1729 Paixão T, Barton NH (2016) The effect of gene interactions on the long-term response to  
1730 selection. *Proc Natl Acad Sci USA* 113:4422–4427. doi: 10.1073/pnas.1518830113
- 1731 Palmé AE, Pyhajarvi T, Wachowiak W, Savolainen O (2009) Selection on Nuclear Genes in a

- 1732 Pinus Phylogeny. *Molecular Biology and Evolution* 26:893–905. doi:  
1733 10.1093/molbev/msp010
- 1734 Pavlidis P, Metzler D, Stephan W (2012) Selective sweeps in multilocus models of quantitative  
1735 traits. *Genetics* 192:225–239. doi: 10.1534/genetics.112.142547
- 1736 Patterson HD, Thompson R (1971) Recovery of interblock information when block sizes are  
1737 unequal. *Biometrika* 58:545–554.
- 1738 Pennings PS, Hermisson J (2006a) Soft sweeps III: the signature of positive selection from  
1739 recurrent mutation. *PLoS Genetics* 2:e186. doi: 10.1371/journal.pgen
- 1740 Pennings PS, Hermisson J (2006b) Soft Sweeps II--Molecular Population Genetics of Adaptation  
1741 from Recurrent Mutation or Migration. *Molecular Biology and Evolution* 23:1076–1084.  
1742 doi: 10.1093/molbev/msj117
- 1743 Petit RJ, Hampe A (2006) Some evolutionary consequences of being a tree. *Annual review of*  
1744 *ecology* 37:187–214.
- 1745 Phillips PC (2008) Epistasis—the essential role of gene interactions in the structure and  
1746 evolution of genetic systems. *Nature Reviews Genetics* 9:855–867.
- 1747 Piepho HP, Möhring J, Melchinger AE, Büchse A (2008) BLUP for phenotypic selection in plant  
1748 breeding and variety testing. *Euphytica* 161:209–228.
- 1749 Pickrell JK, Berisa T, Liu JZ, Ségurel L (2016) Detection and interpretation of shared genetic  
1750 influences on 42 human traits. *Nature Genetics* 48:709–717. doi: 10.1038/ng.3570
- 1751 Platt A, Vilhjalmsón BJ, Nordborg M (2010) Conditions under which genome-wide association  
1752 studies will be positively misleading. *Genetics* 186:1045–1052.
- 1753 Price AL, Patterson NJ, Plenge RM, Weinblatt ME, Shadick NA, Reich D (2006) Principal  
1754 components analysis corrects for stratification in genome-wide association studies. *Nature*  
1755 *Genetics* 38:904–909.
- 1756 Pritchard JK, Pickrell JK, Coop G (2010) The Genetics of Human Adaptation: Hard Review  
1757 Sweeps, Soft Sweeps, and Polygenic Adaptation. *Current Biology* 20:R208–R215. doi:  
1758 10.1016/j.cub.2009.11.055
- 1759 Prout T, Barker JSF (1993) *F* statistics in *Drosophila buzzatii*: selection, population size and  
1760 inbreeding. *Genetics* 134: 369–375.
- 1761 Prunier J, Laroche J, Beaulieu J, Bousquet J (2011) Scanning the genome for gene SNPs related  
1762 to climate adaptation and estimating selection at the molecular level in boreal black spruce.  
1763 *Molecular Ecology* 20:1702–1716. doi: 10.1111/j.1365-294X.2011.05045.x

- 1764 Prunier J, Verta J-P, MacKay JJ (2015) Conifer genomics and adaptation: at the crossroads of  
1765 genetic diversity and genome function. *New Phytologist* 209:44–62.
- 1766 Przeworski M, Coop G, Wall JD (2005) The signature of positive selection on standing genetic  
1767 variation. *Evolution* 59:2312–13. doi: 10.1554/05-273.1
- 1768 Quesada, T., Li, Z., Dervinis, C., et al. (2008). Comparative analysis of the transcriptomes of  
1769 *Populus trichocarpa* and *Arabidopsis thaliana* suggests extensive evolution of gene  
1770 expression regulation in angiosperms. *New Phytologist* 180:408–420.
- 1771 Ralph P, Coop G (2010) Parallel adaptation: one or many waves of advance of an advantageous  
1772 allele? *Genetics* 186:647–668. doi: 10.1534/genetics.110.119594
- 1773 Rellstab C, Gugerli F, Eckert AJ, et al (2015) A practical guide to environmental association  
1774 analysis in landscape genomics. *Molecular Ecology* 24:4348–4370. doi: 10.1111/mec.13322
- 1775 Remington DL (2015) Alleles versus mutations: Understanding the evolution of genetic  
1776 architecture requires a molecular perspective on allelic origins. *Evolution* 69:3025–3038.  
1777 doi: 10.1111/evo.12775
- 1778 Riesch R, Muschick M, Lindtke D, et al (2017) Transitions between phases of genomic  
1779 differentiation during stick-insect speciation. *Nat ecol evol* 1:1–13. doi: 10.1038/s41559-  
1780 017-0082
- 1781 Ritland, K., Krutovsky, K.V., Tsumura, Y., Pelgas, B., Isabel, N. and Bousquet, J., 2011. Genetic  
1782 mapping in conifers. In: *Genetics, genomics and breeding of conifers*, pp.196-238.
- 1783 Ritland K, Ritland C (1996) Inferences about quantitative inheritance based on natural  
1784 population structure in the yellow monkeyflower, *Mimulus guttatus*. *Evolution* 50:1074-  
1785 1082.
- 1786 Rockman, M. V. (2012, January). The QTN program and the alleles that matter for evolution: All  
1787 that’s gold does not glitter. *Evolution* 66:1-17.
- 1788 Rodríguez-Quilón I, Santos-del-Blanco L, Serra-Varela MJ, Koskela J, González-Martínez SC,  
1789 Alía R (2016) Capturing neutral and adaptive genetic diversity for conservation in a highly  
1790 structured tree species. *Ecological Applications* 26:2254-2266. doi:
- 1791 Romero IG, Ruvinsky I, Gilad Y (2012) Comparative studies of gene expression and the  
1792 evolution of gene regulation. *Nature Publishing Group* 13:505–516. doi: 10.1038/nrg3229
- 1793 Roschanski AM, Csilléry K, Liepelt S et al (2016) Evidence of divergent selection at landscape  
1794 and local scales in *Abies alba* Mill. in the French Mediterranean Alps. *Molecular Ecology*  
1795 25:776-794.

- 1796 Savolainen O, Lascoux M, Merilä J (2013) Ecological genomics of local adaptation. *Nature*  
1797 *Reviews Genetics* 14:807–820. doi: 10.1038/nrg3522
- 1798 Savolainen O, Pyhäjärvi T, Knürr T (2007) Gene Flow and Local Adaptation in Trees. *Annual*  
1799 *Review of Ecology, Evolution, and Systematics* 38:595–619. doi:  
1800 10.1146/annurev.ecolsys.38.091206.095646
- 1801 Schoville SD, Bonin A, Francois O, et al (2012) Adaptive Genetic Variation on the Landscape:  
1802 *Methods and Cases. Annual Review of Ecology, Evolution, and Systematics* 43:23–43. doi:  
1803 10.1146/annurev-ecolsys-110411-160248
- 1804 Schrider DR, Kern AD (2017) Soft Sweeps Are the Dominant Mode of Adaptation in the Human  
1805 *Genome. Molecular Biology and Evolution* 1–15. doi: 10.1093/molbev/msx154
- 1806 Schrider DR, Kern AD (2016) S/HIC: Robust Identification of Soft and Hard Sweeps Using  
1807 *Machine Learning. PLoS Genetics* 12:e1005928–31. doi: 10.1371/journal.pgen.1005928
- 1808 Schrider DR, Mendes FK, Hahn MW, Kern AD (2015) Soft shoulders ahead: spurious signatures  
1809 of soft and partial selective sweeps result from linked hard sweeps. *Genetics* 200:267–284.  
1810 doi: 10.1534/genetics.115.174912/-/DC1
- 1811 Schrider DR, Shanku AG, Kern AD (2016) Effects of linked selective sweeps on demographic  
1812 inference and model selection. *Genetics* 204:1207–1223. doi:  
1813 10.1534/genetics.116.190223/-/DC1
- 1814 Searle SR, Casella G, McCulloch CE (1992) *Variance Components*. New York, NY: John Wiley  
1815 & Sons, Inc. 528 pp.
- 1816 Simons YB, Bullaughey K, Hudson RR, Sella G (2017) A model for the genetic architecture of  
1817 quantitative traits under stabilizing selection. *bioRxiv* 1–76. doi: arXiv:1704.06707
- 1818 Slate J (2005) Quantitative trait locus mapping in natural populations: progress, caveats and  
1819 future directions. *Molecular Ecology* 14:363–379. doi: 10.1111/j.1365-294X.2004.02378.x
- 1820 Slatkin M (1987) Gene flow and the geographic structure of natural populations. *Science*  
1821 236:787–793. doi: 10.1126/science.3576198
- 1822 Slatkin M (1975) Gene flow and selection in a two-locus system. *Genetics* 81:787–802.
- 1823 Smith SD (2016) Pleiotropy and the evolution of floral integration. *New Phytologist* 209:80–85.  
1824 doi: 10.1111/nph.13583
- 1825 Smith SA, Donoghue MJ (2008) Rates of molecular evolution are linked to life history in  
1826 flowering plants. *Science* 322:86–89.

- 1827 Sork VL, Aitken SN, Dyer RJ, et al (2013) Putting the landscape into the genomics of trees:  
1828 approaches for understanding local adaptation and population responses to changing  
1829 climate. *Tree Genetics & Genomes* 9:901–911. doi: 10.1007/s11295-013-0596-x
- 1830 Speed, D., & Balding, D. J. (2014). MultiBLUP: improved SNP-based prediction for complex  
1831 traits. *Genome Research*, 24(9), 1550–1557. <http://doi.org/10.1101/gr.169375.113>
- 1832 Spitze K (1993) Population structure in *Daphnia obtusa*: quantitative genetic and allozyme  
1833 variation. *Genetics* 135:367-374.
- 1834 Spencer CCA, Su Z, Donnelly P, Marchini J (2009) Designing genome-wide association studies:  
1835 sample size, power, imputation, and the choice of genotyping chip. *PLoS Genetics*  
1836 5:e1000477.
- 1837 St Clair JB, Mandel NL, Vance-Borland KW (2005) Genecology of Douglas fir in western  
1838 Oregon and Washington. *Annals of Botany* 96:1199–1214.
- 1839 Stephan, W. (2010) Genetic hitchhiking versus background selection: the controversy and its  
1840 implications. *Philos Trans R Soc Lond B Biol Sci* 365: 1245-1253.
- 1841 Stephan W (2015) Signatures of positive selection: from selective sweeps at individual loci to  
1842 subtle allele frequency changes in polygenic adaptation. *Molecular Ecology* 25:79–88. doi:  
1843 10.1111/mec.13288
- 1844 Stephens M, Balding DJ (2009) Bayesian statistical methods for genetic association studies.  
1845 *Nature Reviews Genetics* 10:681-690.
- 1846 Stinchcombe JR, Hoekstra HE (2008) Combining population genomics and quantitative genetics:  
1847 finding the genes underlying ecologically important traits. *Heredity* 100:158–170. doi:  
1848 10.1038/sj.hdy.6800937
- 1849 Storey JD, Tibshirani R (2003) Statistical significance for genomewide studies. *Proceedings of*  
1850 *the National Academy of Sciences of the United States of America* 100:9440-9445.
- 1851 Strickler SR, Bombarely A, Mueller LA (2012) Designing a transcriptome next-generation  
1852 sequencing project for a nonmodel plant species1. *American Journal of Botany* 99:257–266.  
1853 doi: 10.3732/ajb.1100292
- 1854 Tan, B., Grattapaglia, D., Wu, H. X., & Ingvarsson, P. K. (2017). Genomic prediction reveals  
1855 significant non-additive effects for growth in hybrid *Eucalyptus*. *bioRxiv*, 1–35.  
1856 <http://doi.org/10.1101/178160>
- 1857 Tenaillon O (2014) The Utility of Fisher's Geometric Model in Evolutionary Genetics. *Annual*  
1858 *Review of Ecology, Evolution, and Systematics* 45:179–201. doi: 10.1146/annurev-ecolsys-

- 1859 120213-091846
- 1860 Thavamanikumar S, Southerton SG, Bossinger G, Thumma BR (2013) Dissection of complex
- 1861 traits in forest trees — opportunities for marker-assisted selection. *Tree Genetics &*
- 1862 *Genomes* 9:627–639. doi: 10.1007/s11295-013-0594-z
- 1863 Tiffin P, Ross-Ibarra J (2014) Advances and limits of using population genetics to understand
- 1864 local adaptation. *Trends in Ecology & Evolution* 29:673–680. doi:
- 1865 10.1016/j.tree.2014.10.004
- 1866 Tigano A, Friesen VL (2016) Genomics of local adaptation with gene flow. *Molecular Ecology*
- 1867 25:2144–2164. doi: 10.1111/mec.13606
- 1868 Turelli M, Barton NH (1994) Genetic and statistical analyses of strong selection on polygenic
- 1869 traits: what, me normal? *Genetics* 138:913–941.
- 1870 Via S, Lande R (1985) Genotype-environment interaction and the evolution of phenotypic
- 1871 plasticity. *Evolution* 39:505–522. doi: 10.1111/j.1558-5646.1985.tb00391.x
- 1872 Vialette-Guiraud ACM, Andres-Robin A, Chambrier P, et al (2016) The analysis of Gene
- 1873 Regulatory Networks in plant evo-devo. *Journal of Experimental Botany* 67:2549–2563.
- 1874 doi: 10.1093/jxb/erw119
- 1875 Vitezica ZG, Legarra A, Toro MA, Varona L (2017) Orthogonal Estimates of Variances for
- 1876 Additive, Dominance, and Epistatic Effects in Populations. *Genetics* 206:1297–1307. doi:
- 1877 10.1534/genetics.116.199406
- 1878 Vizcaíno-Palomar N, Revuelta-Eugercios B, Zavala MA, Alia R, González-Martínez SC (2014)
- 1879 The role of population origin and microenvironment in seedling emergence and early
- 1880 survival in Mediterranean maritime pine (*Pinus pinaster* Aiton). *PLoS ONE* 9:e109132.
- 1881 Wachowiak W, Trivedi U, Perry A, Cavers S (2015) Comparative transcriptomics of a complex
- 1882 of four European pine species. *BMC Genomics* 16:1–9. doi: 10.1186/s12864-015-1401-z
- 1883 Wadgyamar SM, Lowry DB, Gould BA, et al (2017) Identifying targets and agents of selection:
- 1884 innovative methods to evaluate the processes that contribute to local adaptation. *Methods in*
- 1885 *Ecology and Evolution* 8:738–749. doi: 10.1111/2041-210X.12777
- 1886 Wagner GP, Altenberg L (1996) Perspective: complex adaptations and the evolution of
- 1887 evolvability. *Evolution* 50:967. doi: 10.2307/2410639
- 1888 Wagner GP, Kenney-Hunt JP, Pavlicev M, et al (2008) Pleiotropic scaling of gene effects and
- 1889 the “cost of complexity.” *Nature* 452:470–472. doi: 10.1038/nature06756
- 1890 Wagner GP, Pavlicev M, Cheverud JM (2007) The road to modularity. *Nature Reviews Genetics*



- 1891 8:921–931. doi: 10.1038/nrg2267
- 1892 Wagner GP, Zhang J (2011) The pleiotropic structure of the genotype–phenotype map: the  
1893 evolvability of complex organisms. *Nature Publishing Group* 12:204–213. doi:  
1894 10.1038/nrg2949
- 1895 Wang L, Beissinger TM, Lorant A, Ross-Ibarra C, Ross-Ibarra J, Hufford M (2017) The  
1896 interplay of demography and selection during maize domestication and expansion. *bioRxiv*  
1897 doi: <https://doi.org/10.1101/114579>
- 1898 Wang Z, Liao BY, Zhang J (2010) Genomic patterns of pleiotropy and the evolution of  
1899 complexity. *Proceedings of the National Academy of Science* 107:18034–18039. doi:  
1900 10.1073/pnas.1004666107
- 1901 Wegrzyn JL, Lee JM, Tarse BR, Neale DB (2008) TreeGenes: A Forest Tree Genome  
1902 Database. *International Journal of Plant Genomics* 2008:1–7. doi: 10.1155/2008/412875
- 1903 Wegrzyn JL, Main D, Figueroa B, et al (2012) Uniform standards for genome databases in forest  
1904 and fruit trees. *Tree Genetics & Genomes* 8:549–557. doi: 10.1007/s11295-012-0494-7
- 1905 Welch JJ, Waxman D (2003) Modularity and the cost of complexity. *Evolution* 57:1723–13. doi:  
1906 10.1554/02-673
- 1907 Wellenreuther M, Hansson B (2016) Detecting Polygenic Evolution: Problems, Pitfalls, and  
1908 Promises. *Trends in Genetics* 32:155–164. doi: 10.1016/j.tig.2015.12.004
- 1909 Whitlock MC (1999) Neutral additive genetic variance in a metapopulation. *Genetical Research*  
1910 74:215–221.
- 1911 Whitlock MC (2003) Fixation probability and time in subdivided populations. *Genetics* 164:767–  
1912 779.
- 1913 Whitlock MC, Gilbert KJ (2012)  $Q_{ST}$  in a hierarchically structured population. *Molecular*  
1914 *Ecology Resources* 12:481–483.
- 1915 Whitlock, M. C. and F. Guillaume. 2009. Testing for spatially divergent selection: Comparing  
1916  $Q_{ST}$  to  $F_{ST}$ . *Genetics* 183: 1055-1063.
- 1917 Whitlock MC, Lotterhos KE (2015) Reliable detection of loci responsible for local adaptation:  
1918 Inference of a null model through trimming the distribution of  $F_{ST}$ . *The American Naturalist*  
1919 186:S24–S36. doi: 10.1086/682949
- 1920 Whitlock MC, Phillips PC, Moore FB (1995) Multiple fitness peaks and epistasis. *Annual*  
1921 *Review of Ecology and Systematics* 26:601–629. doi: [annurev.es.26.110195.003125](https://doi.org/10.1101/195.003125)

- 1922 Wright S (1932) The roles of mutation, inbreeding, crossbreeding, and selection in evolution.  
1923       Proceedings of the Sixth International Congress on Genetics, Vol. 1, No. 6. (1932), pp. 356-  
1924       366.
- 1925 Wright S (1931) Evolution in Mendelian populations. *Genetics* 16:97–159.
- 1926 Xu S (2003) Theoretical Basis of the Beavis Effect. *Genetics* 165:2259–2268. doi:  
1927       10.1038/hdy.1992.131
- 1928 Yang J, Benyamin B, McEvoy BP, et al (2010) Common SNPs explain a large proportion of the  
1929       heritability for human height. *Nature Genetics* 42:565–569. doi: 10.1038/ng.608
- 1930 Yang, J., S. Mezmouk, A. Baumgarten, E. S. Buckler, K. E. Guill, M. D. McMullen, and J. Ross-  
1931       Ibarra. 2017. Incomplete dominance of deleterious alleles contribute substantially to trait  
1932       variation and heterosis in maize. *bioRxiv*. Doi: <https://doi.org/10.1101/086132>
- 1933 Yeaman S (2013) Genomic rearrangements and the evolution of clusters of locally adaptive loci.  
1934       Proceedings of the National Academy of Sciences 110:E1743–51. doi:  
1935       10.1073/pnas.1219381110
- 1936 Yeaman S (2015) Local Adaptation by Alleles of Small Effect. *The American Naturalist*  
1937       186:S74–S89. doi: 10.1086/682405
- 1938 Yeaman S, Hodgins KA, Lotterhos KE, et al (2016) Convergent local adaptation to climate in  
1939       distantly related conifers. *Science* 353:1431–1433. doi: 10.1126/science.aaf7812
- 1940 Yeaman S, Jarvis A (2006) Regional heterogeneity and gene flow maintain variance in a  
1941       quantitative trait within populations of lodgepole pine. *Proceedings of the Royal Society B:*  
1942       *Biological Sciences* 273:1587–1593. doi: 10.1534/genetics.166.2.1053
- 1943 Yeaman S, Otto SP (2011) Establishment and maintenance of adaptive genetic divergence under  
1944       migration, selection, and drift. *Evolution* 65:2123–2129. doi: 10.1111/j.1558-  
1945       5646.2011.01277.x
- 1946 Yeaman S, Whitlock MC (2011) The genetic architecture of adaptation under migration-  
1947       selection balance. *Evolution* 65:1897–1911. doi: 10.1111/j.1558-5646.2011.01269.x
- 1948 Yoder JB, Tiffin P (2017) Effects of Gene Action, Marker Density, and Timing of Selection on  
1949       the Performance of Landscape Genomic Scans of Local Adaptation. *Journal of Heredity* 1–  
1950       13. doi: 10.1093/jhered/esx042
- 1951 Yu J, Pressoir G, Briggs WH, Vroh Bi I, Yamasaki M et al. (2005) A unified mixed-model  
1952       method for association mapping that accounts for multiple levels of relatedness. *Nature*  
1953       *Genetics* 38:203-208.



- 1954 Zhang X-S (2012) Fisher's geometric model of fitness landscape and variance in fitness within a  
1955 changing environment. *Evolution* 66:2350–2368. doi: 10.1111/j.1558-5646.2012.01610.x
- 1956 Zhou, X., Carbonetto, P., & Stephens, M. (2013). Polygenic modeling with Bayesian sparse  
1957 linear mixed models. *PLoS Genetics*, 9(2), e1003264.  
1958 <http://doi.org/10.1371/journal.pgen.1003264>
- 1959 Zöllner S, Pritchard JK (2007) Overcoming the Winner's Curse: Estimating Penetrance  
1960 Parameters from Case-Control Data. *The American Journal of Human Genetics* 80:605–615.  
1961 doi: 10.1086/512821
- 1962 Zuk O, Hechter E, Sunyaev SR (2012) The mystery of missing heritability: Genetic interactions  
1963 create phantom heritability. *Proceedings of the National Academy of Science* 109:1193–  
1964 1198. doi: 10.1073/pnas.1119675109/-/DCSupplemental

Lind *et al*: Are we out of the woods yet?

## 1965 **Author Contributions**

1966 BML and AJE conceived the review, with contributions from MM, CEB, and TMF. BML, MM,  
 1967 CEB, and TMF contributed to the literature search and survey which was analyzed by BML.  
 1968 BML wrote the manuscript with contributions from MM and AJE. AJE created Box 1. All  
 1969 authors contributed to the editing of the manuscript.

1970 **FIGURES**

1971 *Figure 1*

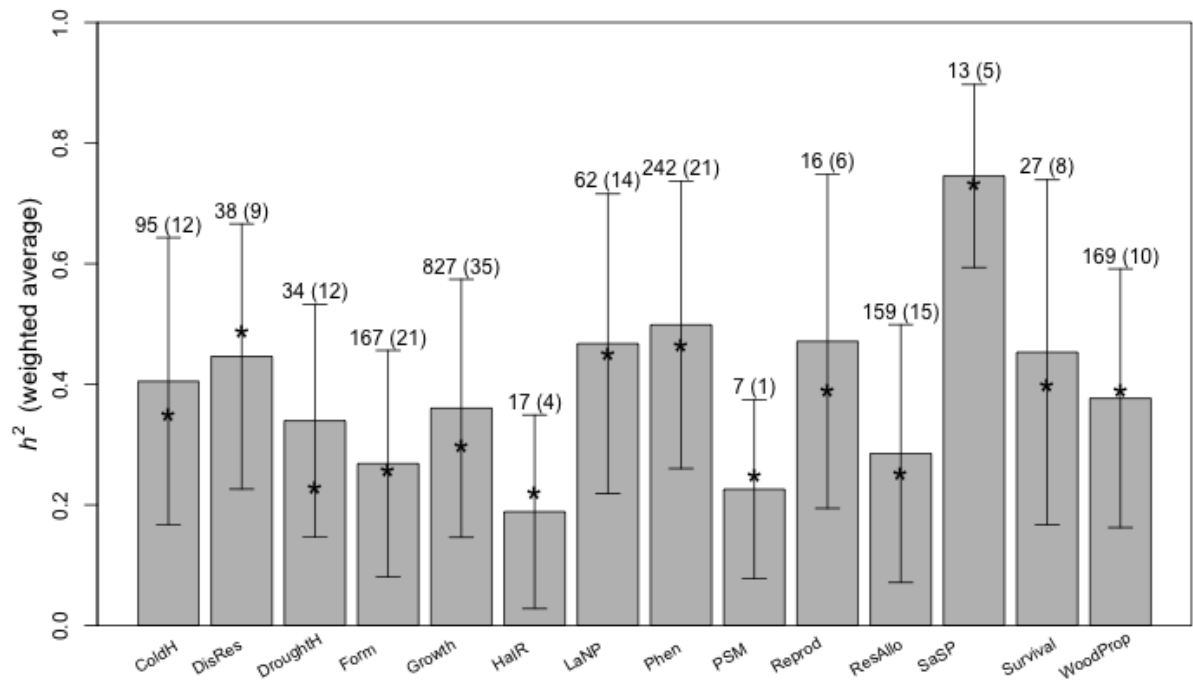

1972 **Figure 1.** Averages of narrow sense heritability calculated by weighting the number of families  
1973 used in each estimate of heritability. Error bars represent the standard deviation of the weighted  
1974 averages. ColdH = cold hardiness, DisRes = disease resistance, DroughtH = drought hardiness,  
1975 HaIR = herbivore and insect resistance, LaNP = leaf and needle properties, Phen = phenology,  
1976 PSM = plant secondary metabolites, Reprod = reproduction, ResAllo = resource allocation, SaSP  
1977 = seed and seedling properties, WoodProp = wood properties. Asterisks indicate median values  
1978 of the unweighted  $Q_{ST}$  distribution.  
1979

1980 **Figure 2**

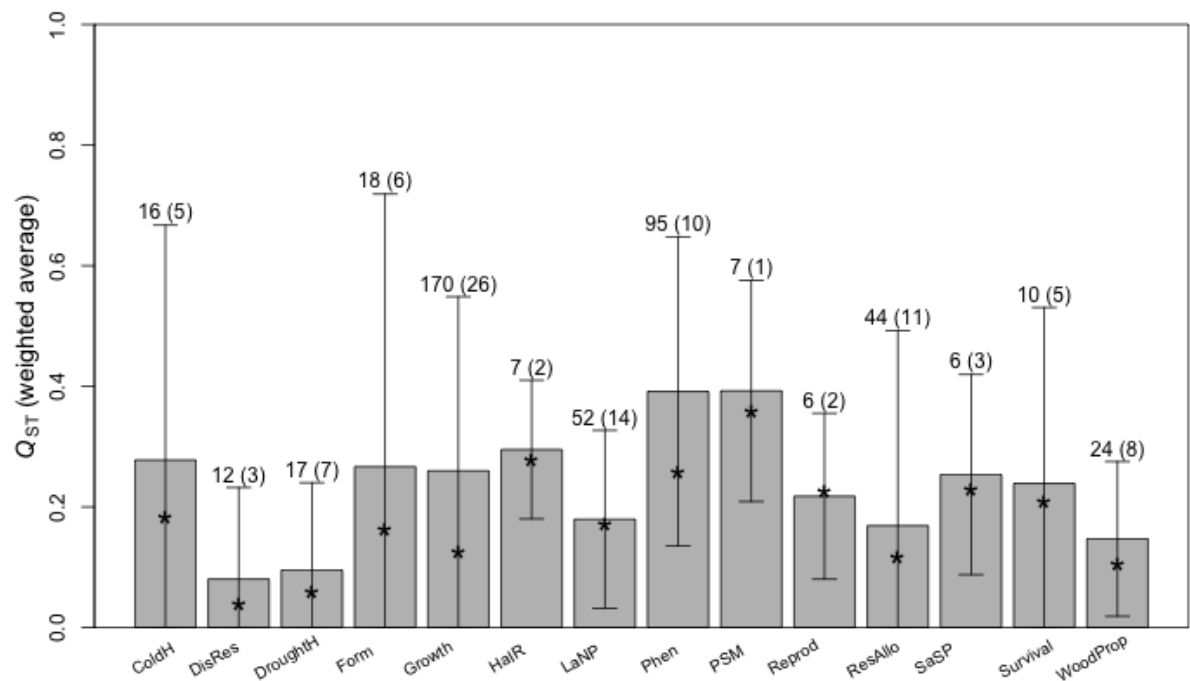

1981 **Figure 2.** Average  $Q_{ST}$  for each of 14 traits from literature review calculated by weighting each  
1982 estimate by the number of families used in the estimation. Error bars represent the standard  
1983 deviation of the weighted averages. Numbers above error bars represent total number of  
1984 estimates, with total number of unique species in parentheses. Asterisks indicate median values  
1985 of the unweighted  $Q_{ST}$  distribution. Abbreviations as in Figure 1.  
1986

1987 **Figure 3A**

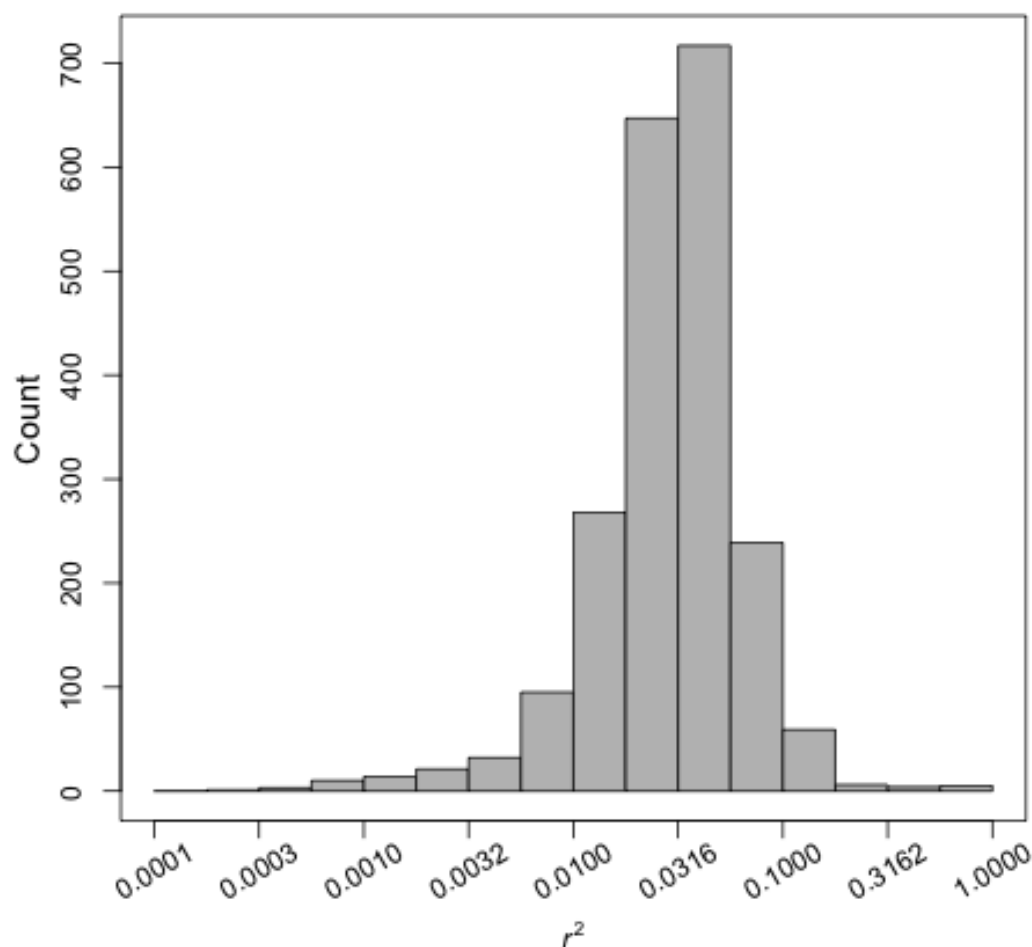

1988  
1989 **Figure 3A.** Counts of  $r^2$  estimates from single-locus genotype-phenotype associations from  
1990 literature review. Note logarithmic x-axis.

1991 **Figure 3B**

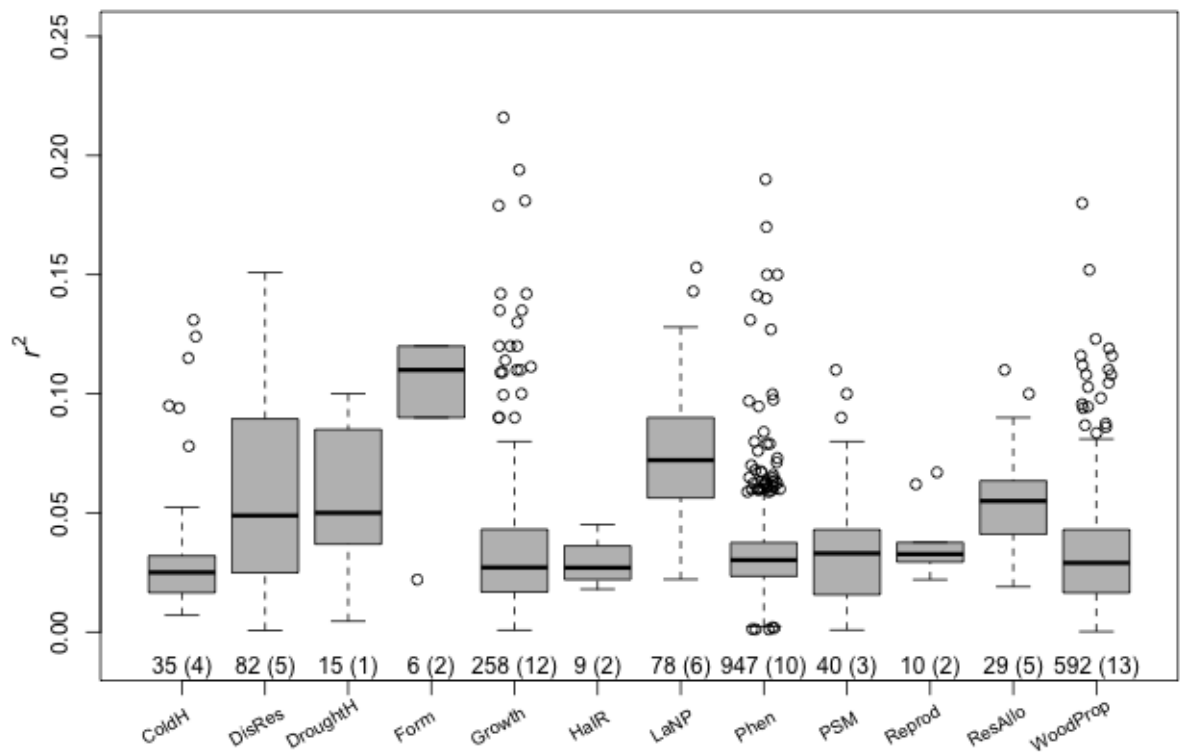

1992 **Figure 3B.** Distribution of  $r^2$  values for trait groups within genotype-phenotype literature review.  
1993 Values along x-axis are total number of estimates and number of species across estimates. Not  
1994 shown are nine outliers for disease resistance to *Cronartium ribicola* in *Pinus monticola* (range =  
1995 [0.402, 1.0]) from Lui et al. 2017. Abbreviations as in Figure 1.  
1996

1997 **BOXES**

1998 *Box 1 figure*

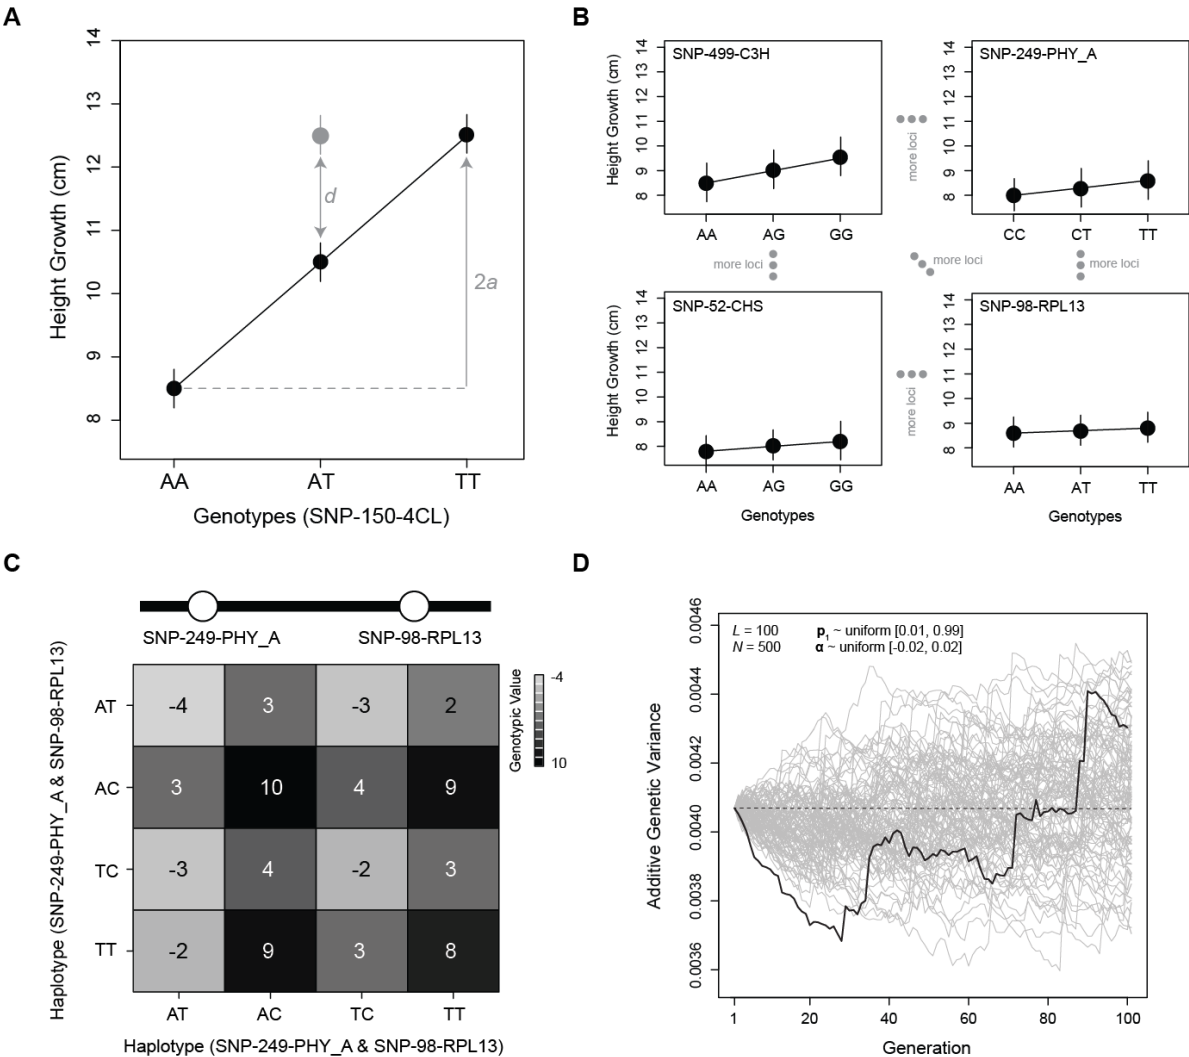

**Figure I.** Relevant quantitative genetic concepts are needed to understand the evolution of polygenic traits. (A) Additive and nonadditive effects at a single locus, where  $a$  is defined as the additive effect (also known as the average effect of allelic substitution [ $\alpha$ ] when there is no dominance) and  $d$  is defined as the dominance deviation. With dominance,  $\alpha = a[1 + k(p - q)]$ , where  $k$  is the degree of dominance ( $k = 0$ : additive,  $k = 1$ : dominance,  $k > 1$ : over-dominance, see Lynch & Walsh 1998). (B) Polygenic traits are determined by multiple genes, each with additive (shown) and non-additive (not shown) effects. The total additive effect is the sum of the additive effects at all causative loci. (C) Additive-by-additive epistasis, where the additive effect of an allele at the PHY\_A SNP depends on what allele it is paired with at the RPL13 SNP. In this case, the effects can be thought of as dependent in the following manner using the four possible haplotypes at the PHY\_A (A/T SNP) and RPL13 (C/T SNP) SNPs – AC: +5, AT: -2, TC: -1, TT: 4. (D) The effect of genetic drift on the additive genetic variance as determined by 100 independent, causative loci. Each line represents a simulation of genetic drift in a constant sized population ( $n = 500$  diploids) conditioned on initial allele frequencies across loci ( $p_1$ ) and effect sizes ( $\alpha$ ). The



expected mean across all 100 simulations is given by the dashed black line. Any given simulation can deviate strongly from this expectation (solid black line). Thus, when the elements of  $\mathbf{p}$  change over time, in this case due to genetic drift, so does the additive genetic variance.

# **Box 1: Basic Concepts from Quantitative Genetics**

We follow the traditional decomposition of phenotypes into genetic and environmental components, which forms the basis of quantitative genetics (Fisher 1918, Lynch & Walsh 1998, Charlesworth & Charlesworth 2010, reviewed by Hill 2010). The phenotype of an individual (P) can be decomposed into effects from its genotype (G), its environment (E), and the interaction between its genotype and environment (GxE). Typically, this is thought of as deviations from the population mean, with each causative locus having two alleles. Using this framework, phenotypic variance ( $\sigma^2_P$ ) can be decomposed into genotypic variance ( $\sigma^2_G$ ), environmental variance ( $\sigma^2_E$ ) and the variance due to the interaction between genotypes and environments ( $\sigma^2_{GxE}$ ):

$$\sigma^2_P = \sigma^2_G + \sigma^2_E + \sigma^2_{GxE}$$

For a single locus,  $\sigma^2_G$  can be decomposed into variances arising from additive ( $\sigma^2_A$ ) and dominance ( $\sigma^2_D$ ) effects (Fig. 1). For multiple loci,  $\sigma^2_G$  can be decomposed into variances arising from additive, dominance, and epistatic ( $\sigma^2_I$ ) effects, with the total additive effect across loci being the summation of the effects at each of the causative loci. Dominance and epistatic effects are jointly termed non-additive effects. Thus, the previous equation can be expanded to the following:

$$\sigma^2_P = \sigma^2_A + \sigma^2_D + \sigma^2_I + \sigma^2_E + \sigma^2_{GxE}$$

The decomposition of  $\sigma^2_G$  into different types of effects provides a way of estimating narrow-sense heritability ( $h^2$ ), which is defined as the ratio of additive genetic variance ( $\sigma^2_A$ ) to total phenotypic variance ( $\sigma^2_P$ ). For tree populations, this is often accomplished through variance partitioning techniques (Namkoong 1979) using half-sib designs in common gardens (White *et al.* 2007) or using molecular markers to estimate relatedness in the field (cf. Ritland & Ritland 1996). In the case of half-sib designs, if the assumptions of free recombination and little epistasis among causative loci, random mating, and lack of environmental covariance among sibs are satisfied,  $\sigma^2_A$  is given by (Lynch & Walsh 1998):

$$\sigma^2_A = 4\sigma^2_F$$

where  $\sigma^2_F$  is the variance due to family (e.g., as extracted from a linear mixed model). Hence, for a half-sib design,  $h^2 = 4\sigma^2_F/\sigma^2_P$ . Other sibling designs are possible, with the 4 in the previous equation replaced by  $1/r$ , where  $r$  is the coefficient of relationship (e.g., Whitlock & Gilbert 2012). Clonal and controlled mating designs are also often used for estimation of heritability, often broad-sense heritability (Namkoong 1979; White *et al.* 2007). When families are nested into populations, and an estimate of the among population variance component is made, these are the components also used to estimate  $Q_{ST}$  (Spitze 1993; Prout & Barker 1993). When compared against estimates of  $F_{ST}$  using a similar variance decomposition procedure (e.g., Yang 1998) and a method suitable to account for the substantial variance associated with these components (e.g., Whitlock & Guillaume 2009) conclusions about local adaptation can be reached.

Heritability estimates are population, environment, and time specific, as evidenced by the relationship between  $\sigma^2_A$  and allele frequencies within populations (Lynch & Walsh 1998; e.g. Berg & Coop 2014):

$$\sigma^2_A = 2 \sum_{i=1}^L \alpha_i^2 p_i (1 - p_i)$$

Lind *et al.*: Are we out of the woods yet?

2063 where the summation is over the number of causative loci ( $L$ ),  $\alpha$  is the average effect of allelic substitution  
 2064 at each locus (Fig. 1), and  $p_i$  is the frequency of one of the alleles at each of the causative loci. Thus, any  
 2065 evolutionary force altering  $p$  at some or all of the causative loci will change  $\sigma_A^2$  (cf. Box 3.7 in  
 2066 Charlesworth & Charlesworth 2010). Heritability is also uninformative about the underlying architecture  
 2067 itself, as are the relative magnitudes of the different variance components themselves (Huang & Mackay  
 2068 2016), and can often be misleading about evolutionary potential (Hansen *et al.* 2011).  
 2069

Lind *et al*: Are we out of the woods yet?

2070 This page intentionally left blank.

2071 Supplemental Information

2072 The genomics of local Adaptation in trees:

2073 Are we out of the woods yet?

2074 Brandon M. Lind<sup>\*2</sup>, Mitra Menon<sup>\*</sup>, Connie E. Bolte<sup>\*†</sup>, Trevor M. Faske<sup>†</sup>, and Andrew J.

2075 Eckert<sup>†</sup>

2076 <sup>\*</sup>Integrative Life Sciences, Virginia Commonwealth University, Richmond, Virginia 23284 USA

2077 <sup>†</sup>Department of Biology, Virginia Commonwealth University, Richmond, Virginia 23284 USA

2078 October 14, 2017

2079 **Running Title:** Are we out of the woods yet?

2080 **Keywords:** trees, GWAS, genetic architecture, polygenic local adaptation

---

<sup>2</sup> lindb@vcu.edu

**Supplemental Figures**

**Figure S1**

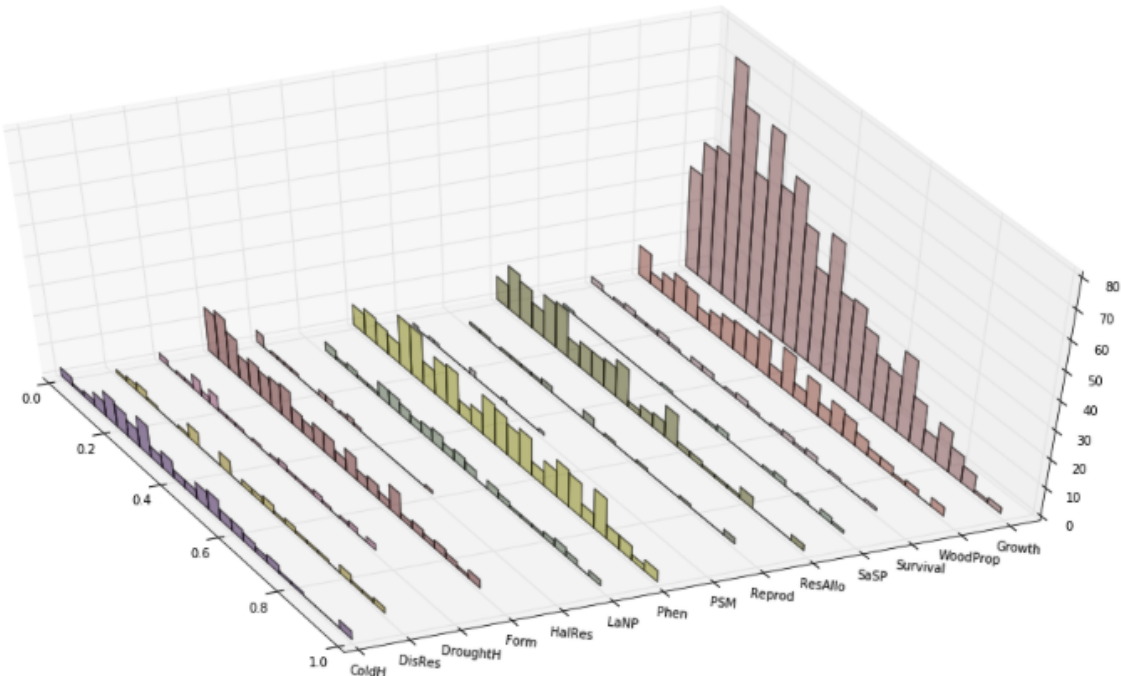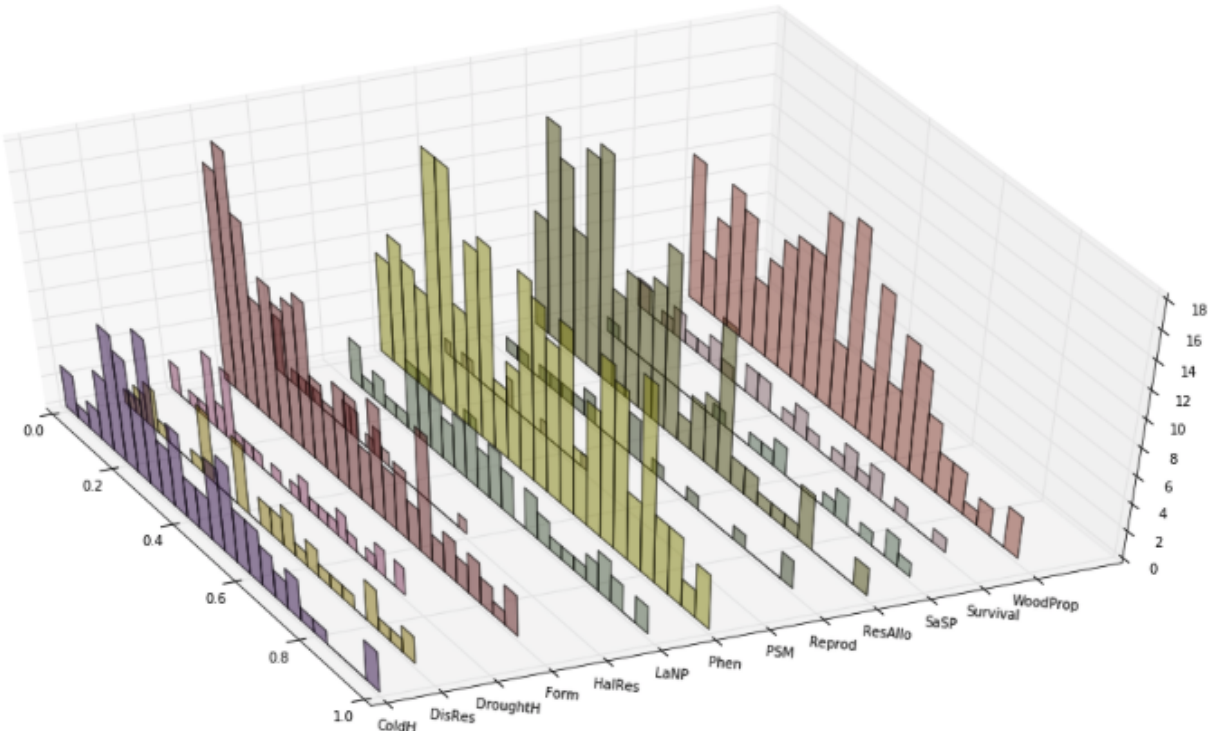

**Figure S1.** Distributions of unweighted narrow sense heritability with (A) and without (B) inclusion of the Growth distribution. Trait abbreviations as in Figure 1 of the main text.

2088 **Figure S2**

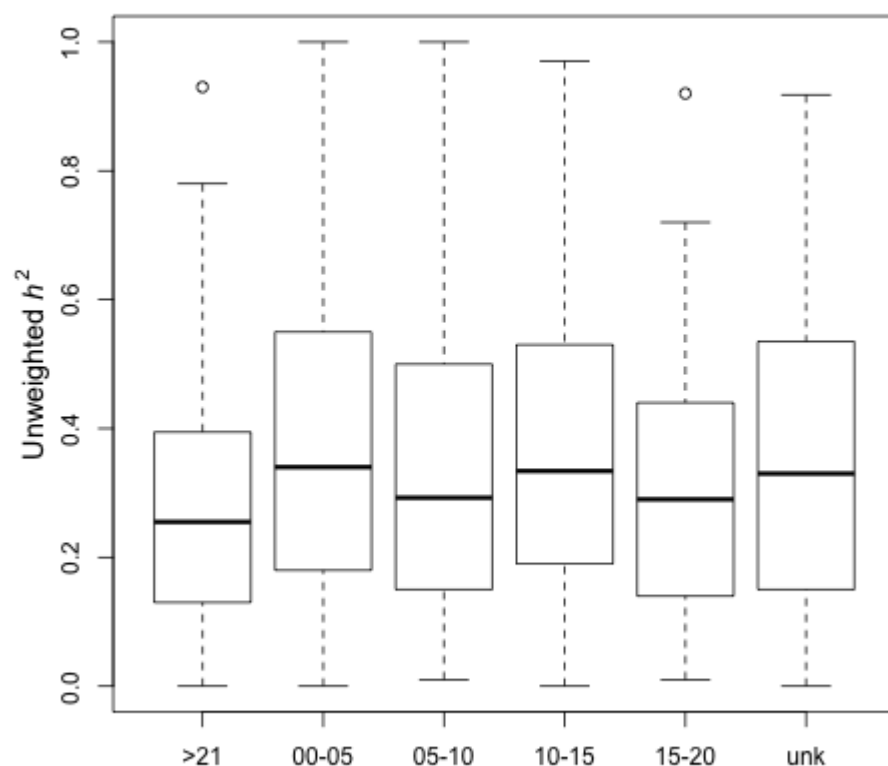

2089 **Figure S2.** Unweighted narrow sense heritability distributions by age (years). Unk = unknown  
 2090 age (i.e., not specified by article).  
 2091

2092 **Figure S3**

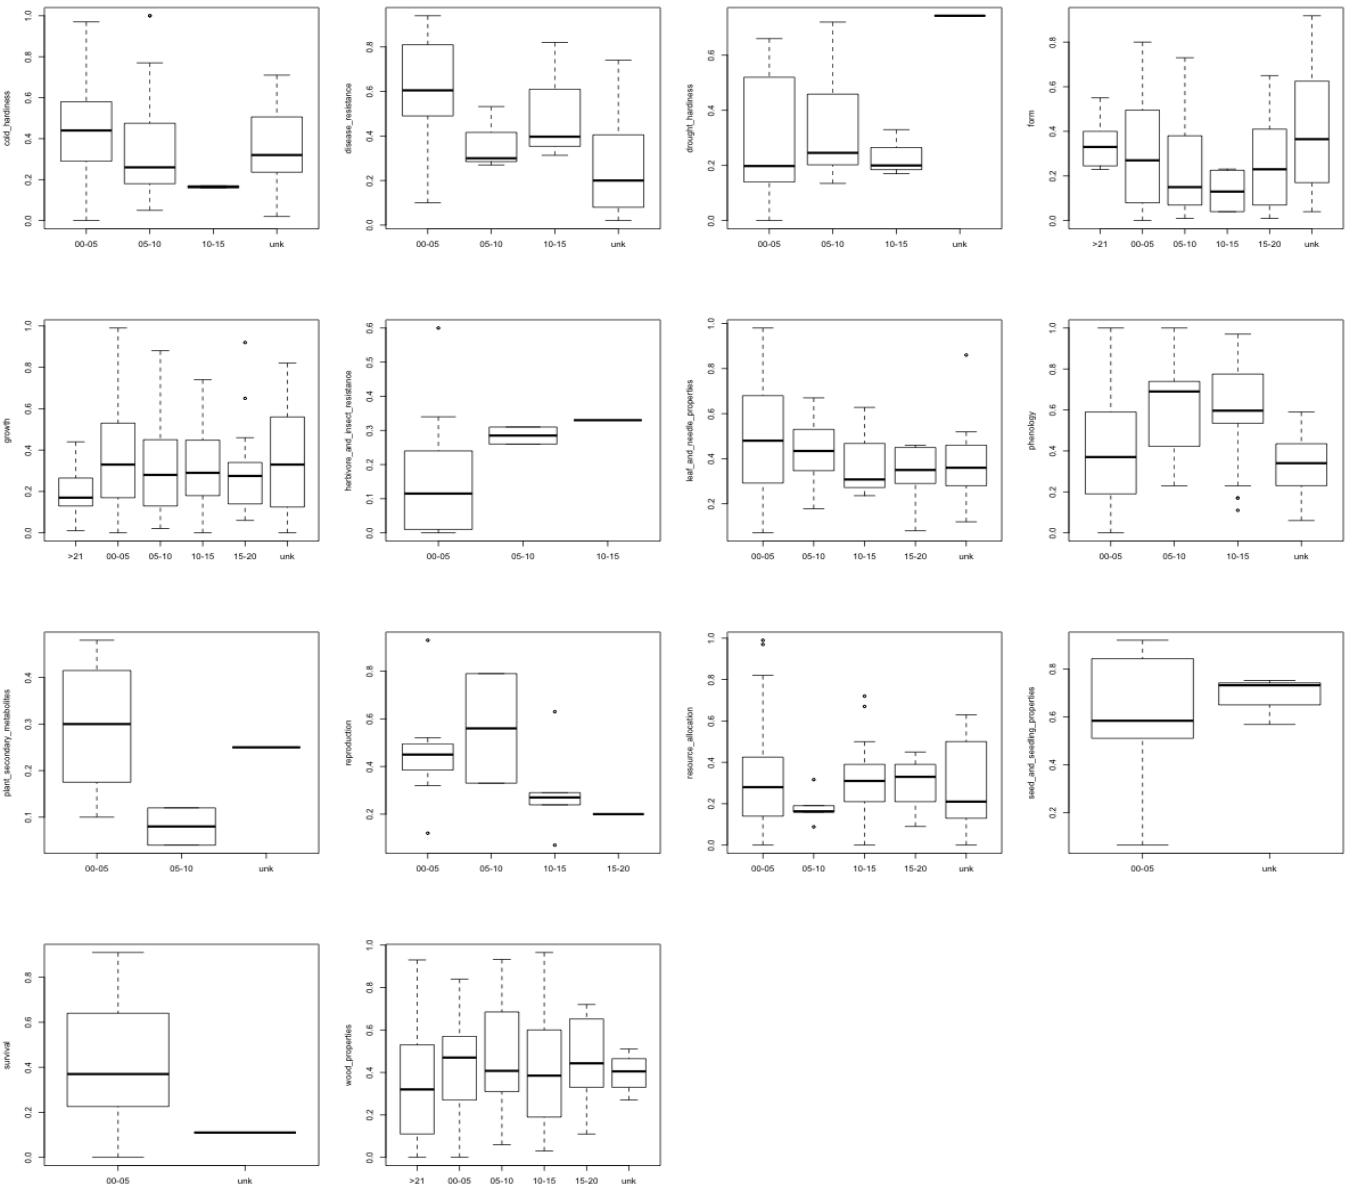

2093 **Figure S3.** Unweighted narrow sense heritability distributions by age (years) and by trait  
2094 category. Unk = unknown (i.e., not specified by article)  
2095



2096 **Figure S4**

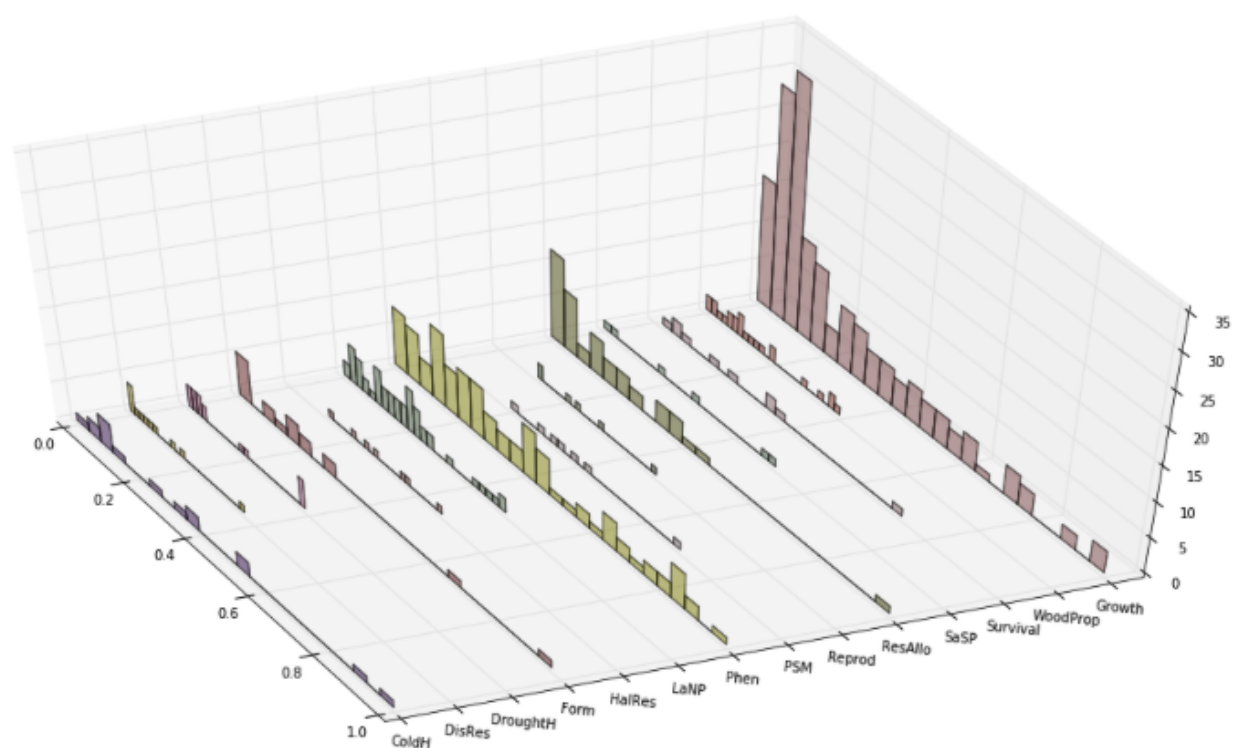

2097 **Figure S4.** Distributions of unweighted QST estimates from literature survey. Abbreviations as  
 2098 in Figure 1.  
 2099

Lind *et al*: Are we out of the woods yet?

2100 *Supplemental Tables*

2101 *Table S1*

| rait Group                     | Total species | Total measurements | Angiosperm | Gymnosperm | Eucalypt | Pine | Populus |
|--------------------------------|---------------|--------------------|------------|------------|----------|------|---------|
| old hardiness                  | 11            | 94                 | 35         | 59         | 27       | 6    | 2       |
| isease resistance              | 9             | 38                 | 20         | 18         | 1        | 12   | 13      |
| rough hardiness                | 12            | 36                 | 15         | 21         | 4        | 10   | 4       |
| orm                            | 15            | 153                | 45         | 108        | 20       | 86   | 3       |
| rowth                          | 41            | 819                | 174        | 645        | 71       | 412  | 21      |
| erbivore and insect resistance | 4             | 17                 | 17         | 0          | 8        | 0    | 0       |
| eaf and needle properties      | 16            | 65                 | 41         | 24         | 11       | 8    | 20      |
| henology                       | 22            | 240                | 92         | 148        | 0        | 50   | 29      |
| lant secondary metabolites     | 1             | 7                  | 7          | 0          | 7        | 0    | 0       |
| eproduction                    | 12            | 49                 | 7          | 42         | 4        | 29   | 2       |
| esource allocation             | 15            | 142                | 29         | 113        | 3        | 58   | 6       |
| eed and seedling properties    | 5             | 13                 | 2          | 11         | 0        | 2    | 0       |
| urvival                        | 8             | 27                 | 5          | 22         | 1        | 20   | 2       |
| ood properties                 | 10            | 168                | 35         | 133        | 13       | 81   | 22      |

2102 **Table S1.** Summary of total and per-species measurements used in literature review of narrow  
2103 sense heritability.

2104 **Table S2**

| trait Group                        | Total<br>measurements | Total<br>species | Angiosperm | Gymnosperm | Eucalypt | Pine | Populus |
|------------------------------------|-----------------------|------------------|------------|------------|----------|------|---------|
| Wood hardness                      | 16                    | 5                | 3          | 13         | 0        | 10   | 2       |
| Disease resistance                 | 12                    | 3                | 3          | 9          | 0        | 9    | 3       |
| Drought hardness                   | 17                    | 7                | 9          | 8          | 4        | 5    | 4       |
| Form                               | 18                    | 6                | 15         | 3          | 1        | 3    | 12      |
| Growth                             | 170                   | 26               | 73         | 97         | 13       | 76   | 44      |
| Herbivore and insect<br>resistance | 7                     | 2                | 7          | 0          | 6        | 0    | 0       |
| Leaf and needle properties         | 52                    | 14               | 44         | 8          | 11       | 5    | 12      |
| Phenology                          | 95                    | 10               | 63         | 32         | 0        | 18   | 53      |
| Plant secondary metabolites        | 7                     | 1                | 7          | 0          | 7        | 0    | 0       |
| Reproduction                       | 6                     | 2                | 2          | 4          | 2        | 4    | 0       |
| Resource allocation                | 44                    | 11               | 16         | 28         | 3        | 26   | 10      |
| Seed and seedling properties       | 6                     | 3                | 2          | 4          | 0        | 0    | 0       |
| Survival                           | 10                    | 5                | 2          | 8          | 2        | 8    | 0       |
| Wood properties                    | 24                    | 8                | 14         | 10         | 8        | 4    | 5       |

2105 **Table S2.** Summary of total and per-species measurements used in literature review of  
2106 differentiation of quantitative genetic variation ( $Q_{ST}$ ).

2107 **Table S3**

| trait Group                    | Total measurements | Total species | Angiosperm | Gymnosperm | Eucalypt | Pine | Populus |
|--------------------------------|--------------------|---------------|------------|------------|----------|------|---------|
| old hardness                   | 35                 | 4             | 2          | 33         | 0        | 0    | 2       |
| isease resistance              | 82                 | 5             | 31         | 51         | 0        | 51   | 30      |
| rough hardness                 | 15                 | 1             | 0          | 15         | 0        | 15   | 0       |
| orm                            | 6                  | 2             | 0          | 6          | 0        | 5    | 0       |
| rowth                          | 258                | 12            | 205        | 53         | 44       | 17   | 152     |
| erbivore and insect resistance | 9                  | 2             | 9          | 0          | 6        | 0    | 3       |
| leaf and needle properties     | 78                 | 6             | 58         | 20         | 0        | 5    | 45      |
| henology                       | 947                | 10            | 886        | 61         | 0        | 0    | 846     |
| lant secondary metabolites     | 40                 | 3             | 32         | 8          | 29       | 8    | 3       |
| eproduction                    | 10                 | 2             | 0          | 10         | 0        | 9    | 0       |
| esource allocation             | 29                 | 5             | 19         | 10         | 4        | 8    | 15      |
| ood properties                 | 592                | 13            | 414        | 178        | 94       | 136  | 316     |

2108 **Table S3.** Summary of total and per-species measurements used in literature review of percent  
2109 phenotypic variance explained by associated markers ( $r^2$ ).

## 2110 **BOXES**

### 2111 **Supplemental Box 1**

#### 2112 **Brief introduction to methods for single-locus genetic association analysis**

2113  
2114 Detecting associations between genetic markers and complex trait variation relies on fitting and  
2115 evaluating linear models, typically of the form:

$$2116 \mathbf{y} = \mathbf{X}\boldsymbol{\beta} + \mathbf{Z}\mathbf{u} + \mathbf{e},$$

2117  
2118 where  $\mathbf{y}$  is a vector of observed or inferred phenotypic values,  $\boldsymbol{\beta}$  and  $\mathbf{u}$  are vectors of random and fixed  
2119 effects, respectively,  $\mathbf{X}$  and  $\mathbf{Z}$  are design matrices associated with  $\boldsymbol{\beta}$  and  $\mathbf{u}$ , and  $\mathbf{e}$  is a vector of residuals  
2120 (Yu *et al.* 2005). In the simplest model, the phenotype ( $\mathbf{y}$ ) is modeled as a function of genetic effects at a  
2121 single locus, represented by marker genotypes for the samples comprising values in  $\mathbf{y}$ , and covariates  
2122 describing relatedness among sampled trees and the structure among populations from which those trees  
2123 were sampled. Genetic effects are encoded based on *a priori* assumptions about the underlying  
2124 architecture of the phenotypic trait under consideration, with the most frequent encoding being that for  
2125 additive effects (e.g. counts of a reference allele) considered as either fixed or random effects (Goddard  
2126 *et al.* 2009). Phenotypic values are often estimates derived through analysis of materials established  
2127 within common gardens, either from clones or sibships, from which estimates of the genetic values of  
2128 unmeasured trees (e.g. maternal trees for which markers have been genotyped) are made using the  
2129 theory of Best Linear Unbiased Predictors (BLUPs; Henderson 1975; Searle *et al.* 1992; Piepho *et al.*  
2130 2008). Inclusion of only fixed effects results in a General Linear Model (GLM), whereas a mixture of fixed  
2131 and random effects results in a Mixed Linear Model (MLM or LMM). The use of covariates is necessary to  
2132 avoid identification of false positive associations arising from the confounding between neutral genetic  
2133 and phenotypic variation due to demographic history and the analysis of relatives (Devlin & Roeder 1999;  
2134 Yu *et al.* 2005; Price *et al.* 2006).

2135  
2136 Models as described above are typically fitted and evaluated using restricted maximum likelihood (REML,  
2137 Patterson & Thompson 1971), although Bayesian methods are available and have the advantage of  
2138 specifying *a priori* assumptions more clearly, remove the distinction between fixed and random effects,  
2139 and are more applicable to testing biologically realistic models (Stephens & Balding 2009). Output from  
2140 these models include estimates of effect sizes for markers (e.g.  $r^2$ , coefficients for random effects,  
2141 genotypic trait means) and, when used in a frequentist framework, probability values ( $p$ -values) of  
2142 observing test statistics under a null model. Bayesian methods, in contrast, provide strength of evidence  
2143 measures such as Bayes Factors for the association of each marker to the phenotype of interest. The  
2144 ability to discover and correctly quantify effect sizes of true positives (i.e. causative markers or indirect  
2145 associations resulting from linkage to causative markers) is dependent upon experimental design,  
2146 including design of genotyping assays, and sample sizes (Long & Langley 1999; Zöllner and Pritchard  
2147 2007; Spencer *et al.* 2009), as well as genome-wide patterns of linkage disequilibrium relative to the  
2148 density of markers in the genome, the genetic distance between the indirectly associated marker and the  
2149 causative locus, and the true underlying genetic architecture of the phenotypic trait under consideration  
2150 (Platt *et al.* 2010; Prichard *et al.* 2010; Caballero *et al.* 2015).

2151  
2152 One model is typically fitted and evaluated per marker-phenotypic trait combination (but see e.g. Wegrzyn  
2153 *et al.* 2010 for haplotype analysis). Even without the issue of confounding described above, this increases  
2154 the likelihood of false positives arising solely from performing many statistical tests. A variety of methods  
2155 exist to deal with multiple testing, with the most popular methods being those based on the false  
2156 discovery rate (Storey & Tibshirani 2003) and permutation (Hirschhorn & Daly 2005). Additional methods  
2157 exist for situations where the multiple tests are not independent from one another (e.g. linkage  
2158 disequilibrium among markers, see Johnson *et al.* 2010) or when permutation analysis is problematic  
2159 (Joo *et al.* 2016).  
2160

## 2161 **Supplemental References**

- 2162 Caballero A, Tenesa A, Keightley PD (2015) The nature of genetic variation for complex traits  
2163 revealed by GWAS and regional heritability mapping analyses. *Genetics* 201:1601-1613.
- 2164 Devlin B, Roeder K (1999) Genomic control for association studies. *Biometrics* 55:997-1004.
- 2165 Goddard ME, Wray NR, Verbyla K, Visscher PM (2009) Estimating effects and making  
2166 predictions from genome-wide marker data. *Statistical Science* 24:517-529.
- 2167 Henderson CR (1975) Best linear unbiased estimation and prediction under a selection model.  
2168 *Biometrics* 31:423-447.
- 2169 Hirschhorn JN, Daly MJ (2005) Genome-wide association studies for common diseases and  
2170 complex traits. *Nature Reviews Genetics* 6:95-108.
- 2171 Johnson RC, Nelson GW, Troyer JL, et al (2010) Accounting for multiple comparisons in a  
2172 genome-wide association study (GWAS). *BMC Genomics* 11:724.
- 2173 Joo JWJ, Hormozdiari F, Han B, Eskin E (2016) Multiple testing correction in linear mixed  
2174 models. *Genome Biology* 17:62.
- 2175 Long AD, Langley CH (1999) The power of association studies to detect the contribution of  
2176 candidate genetic loci to variation in complex traits. *Genome Research* 9:720-731.
- 2177 Patterson HD, Thompson R (1971) Recovery of interblock information when block sizes are  
2178 unequal. *Biometrika* 58:545-554.
- 2179 Piepho HP, Möhring J, Melchinger AE, Büchse A (2008) BLUP for phenotypic selection in plant  
2180 breeding and variety testing. *Euphytica* 161:209-228.
- 2181 Platt A, Vilhjalmsen BJ, Nordborg M (2010) Conditions under which genome-wide association  
2182 studies will be positively misleading. *Genetics* 186:1045-1052.
- 2183 Price AL, Patterson NJ, Plenge RM, Weinblatt ME, Shadick NA, Reich D (2006) Principal  
2184 components analysis corrects for stratification in genome-wide association studies. *Nature*  
2185 *Genetics* 38:904-909.
- 2186 Pritchard JK, Pickrell JK, Coop G (2010) The Genetics of Human Adaptation: Hard Review  
2187 Sweeps, Soft Sweeps, and Polygenic Adaptation. *Current Biology* 20:R208–R215. doi:  
2188 10.1016/j.cub.2009.11.055
- 2189 Searle SR, Casella G, McCulloch CE (1992) *Variance Components*. New York, NY: John Wiley  
2190 & Sons, Inc. 528 pp.
- 2191 Spencer CCA, Su Z, Donnelly P, Marchini J (2009) Designing genome-wide association studies:

- 2192 sample size, power, imputation, and the choice of genotyping chip. PLoS Genetics  
2193 5:e1000477.
- 2194 Stephens M, Balding DJ (2009) Bayesian statistical methods for genetic association studies.  
2195 Nature Reviews Genetics 10:681-690.
- 2196 Storey JD, Tibshirani R (2003) Statistical significance for genomewide studies. Proceedings of  
2197 the National Academy of Sciences of the United States of America 100:9440-9445.
- 2198 Wegrzyn JL, Eckert AJ, Choi M, et al (2010) Association genetics of traits controlling lignin and  
2199 cellulose biosynthesis in black cottonwood (*Populus trichocarpa*, Salicaceae) secondary  
2200 xylem. New Phytologist 188:515–532. doi: 10.1111/j.1469-8137.2010.03415.x
- 2201 Yu J, Pressoir G, Briggs WH, Vroh Bi I, Yamasaki M et al. (2005) A unified mixed-model  
2202 method for association mapping that accounts for multiple levels of relatedness. Nature  
2203 Genetics 38:203-208.
- 2204 Zöllner S, Pritchard JK (2007) Overcoming the Winner’s Curse: Estimating Penetrance  
2205 Parameters from Case-Control Data. The American Journal of Human Genetics 80:605–615.
